# Supplementary material for: Predicting lymph node metastasis and prognosis of individual cancer patients based on miRNA-mediated RNA interactions
Source: BMC Med Genomics. 2022 Apr 17;15(Suppl 1):87. doi: 10.1186/s12920-022-01231-x (PMC9014599; doi:10.1186/s12920-022-01231-x)
Supplement: Supplementary file 1 — Additional file 1. Performance of two base models (logistic regression and SVM) and the ensemble model by stacking the base models in predicting lymph node metastasis. [file 12920_2022_1231_MOESM1_ESM.xlsx]

## Sheet: Sheet1
5-fold cross validation
cancer	model	Sen	Spe	Acc	PPV	NPV	MCC	AUC
BRCA	logistic regression	0.7987	0.7618	0.7801	0.7669	0.7941	0.5607	0.780239
	SVM	0.7476	0.8088	0.7785	0.7932	0.7656	0.5576	0.778191
	stacking	0.7732	0.8056	0.7896	0.7961	0.7835	0.5792	0.789403
COAD	logistic regression	0.68	0.9349	0.8566	0.8226	0.8681	0.6517	0.807456
	SVM	0.8	0.929	0.8893	0.8333	0.9128	0.7375	0.864497
	stacking	0.76	0.9645	0.9016	0.9048	0.9006	0.7638	0.862249
HNSC	logistic regression	0.9412	0.9298	0.936	0.9412	0.9298	0.871	0.935501
	SVM	0.9706	0.8246	0.904	0.8684	0.9592	0.8112	0.897575
	stacking	0.9559	0.8772	0.92	0.9028	0.9434	0.8396	0.916538
LUAD	logistic regression	0.6744	0.8882	0.8138	0.7632	0.8363	0.5807	0.781309
	SVM	0.6512	0.9068	0.8178	0.7887	0.8295	0.5874	0.778998
	stacking	0.593	0.9441	0.8219	0.85	0.8128	0.5967	0.768561
LUSC	logistic regression	0.8942	0.9171	0.9088	0.8611	0.9379	0.8051	0.905679
	SVM	0.8365	0.9116	0.8842	0.8447	0.9066	0.7497	0.87407
	stacking	0.875	0.9337	0.9123	0.8835	0.9286	0.8104	0.904351
STAD	logistic regression	0.9728	0.9306	0.9589	0.9662	0.9437	0.9066	0.951672
	SVM	0.9864	0.8472	0.9406	0.9295	0.9683	0.8651	0.916808
	stacking	0.9728	0.9028	0.9498	0.9533	0.942	0.8854	0.937783
THCA	logistic regression	0.7303	0.6832	0.7053	0.6701	0.7419	0.4128	0.706753
	SVM	0.6404	0.6931	0.6684	0.6477	0.6863	0.3338	0.666759
	stacking	0.6742	0.7228	0.7	0.6818	0.7157	0.3972	0.698465
independent testing
cancer	model	Sen	Spe	Acc	PPV	NPV	MCC	AUC
BRCA	logistic regression	0.7761	0.8188	0.7978	0.8062	0.7902	0.5957	0.79748
	SVM	0.7687	0.8261	0.7978	0.811	0.7862	0.596	0.797372
	stacking	0.7761	0.8261	0.8015	0.8125	0.7917	0.6032	0.801103
COAD	logistic regression	0.7812	0.9589	0.9048	0.8929	0.9091	0.7704	0.870077
	SVM	0.9375	0.9863	0.9714	0.9677	0.973	0.9322	0.961901
	stacking	0.9062	0.9863	0.9619	0.9667	0.96	0.9094	0.946276
HNSC	logistic regression	0.9333	0.8333	0.8889	0.875	0.9091	0.7753	0.883333
	SVM	0.9667	0.7917	0.8889	0.8529	0.95	0.7803	0.879167
	stacking	0.9667	0.7917	0.8889	0.8529	0.95	0.7803	0.879167
LUAD	logistic regression	0.8378	0.9429	0.9065	0.8857	0.9167	0.7915	0.890347
	SVM	0.7297	0.9714	0.8879	0.931	0.8718	0.7503	0.850579
	stacking	0.7838	0.9714	0.9065	0.9355	0.8947	0.7918	0.877606
LUSC	logistic regression	0.8667	0.9487	0.9187	0.907	0.925	0.8236	0.907692
	SVM	0.8222	0.9744	0.9187	0.9487	0.9048	0.8245	0.898291
	stacking	0.8889	0.9615	0.935	0.9302	0.9375	0.859	0.925214
STAD	logistic regression	0.9048	0.9355	0.9149	0.9661	0.8286	0.8171	0.920123
	SVM	0.9048	0.871	0.8936	0.9344	0.8182	0.7641	0.887865
	stacking	0.9048	0.9677	0.9255	0.9828	0.8333	0.8438	0.936252
THCA	logistic regression	0.7368	0.7273	0.7317	0.7	0.7619	0.463	0.732057
	SVM	0.6579	0.8636	0.7683	0.8065	0.7451	0.5363	0.760766
	stacking	0.6579	0.8636	0.7683	0.8065	0.7451	0.5363	0.760766
