# Supplementary material for: Predicting lymph node metastasis and prognosis of individual cancer patients based on miRNA-mediated RNA interactions
Source: BMC Med Genomics. 2022 Apr 17;15(Suppl 1):87. doi: 10.1186/s12920-022-01231-x (PMC9014599; doi:10.1186/s12920-022-01231-x)
Supplement: Supplementary file 2 — Additional file 2. Potential prognostic miRNA–RNA pairs in seven types of cancer. [file 12920_2022_1231_MOESM2_ESM.xlsx]

## Sheet: BRCA
miRNA_RNA pair	type of RNA in the pair	p-value of miRNA-RNA pair	p-value of RNA	p-value of miRNA
miR-26B_AC079414.1	lncRNA	2.27e-05	0.92	0.59
miR-3192_PPDPFL	mRNA	6.32e-05	0.00135	0.0135
miR-3192_AC013549.3	lncRNA	0.000126	0.503	0.0135
miR-3192_CLCA1	mRNA	0.000353	0.0489	0.0135
miR-3192_AC022081.1	lncRNA	0.000372	0.0184	0.0135
miR-26B_AC079070.1	lncRNA	0.000515	0.572	0.59
miR-149_AC092685.1	pseudogene	0.000623	0.000857	0.146
miR-3192_MYL1	mRNA	0.000655	0.243	0.0135
miR-3192_AC090531.1	lncRNA	0.000713	0.244	0.0135
miR-3192_AC138123.2	lncRNA	0.000729	0.2	0.0135
miR-3192_IGLV3-15	pseudogene	0.00114	0.213	0.0135
miR-3192_MTND5P26	pseudogene	0.00115	0.697	0.0135
miR-149_LINC01501	lncRNA	0.00124	0.377	0.146
miR-149_CCL25	mRNA	0.00141	0.154	0.146
miR-3192_AP004247.2	lncRNA	0.00144	0.0172	0.0135
miR-3192_PABPC1L2B	mRNA	0.00188	0.685	0.0135
miR-3192_AL606517.2	pseudogene	0.00193	0.135	0.0135
miR-3192_UTY	mRNA	0.00222	0.264	0.0135
miR-548AA1_TCHHL1	mRNA	0.00227	0.62	0.844
miR-26B_AC133561.1	pseudogene	0.00265	0.97	0.59
miR-3192_AP000462.2	lncRNA	0.003	0.264	0.0135
miR-3192_PPP1R3A	mRNA	0.00348	NA	0.0135
miR-548AA1_HIST1H1A	mRNA	0.00382	0.383	0.844
miR-5691_CSAG2	mRNA	0.00421	0.0757	0.285
miR-548AA1_AC110015.1	lncRNA	0.00463	0.499	0.844
miR-149_AL021877.2	lncRNA	0.00468	0.153	0.146
miR-149_AC008526.1	pseudogene	0.00513	0.0927	0.146
miR-3192_AL606517.1	pseudogene	0.0054	0.781	0.0135
miR-5093_MAFA-AS1	lncRNA	0.00607	0.00243	0.22
miR-3192_RIC3-DT	lncRNA	0.0061	0.0309	0.0135
miR-3192_AP000462.1	lncRNA	0.0061	0.391	0.0135
miR-149_BNIP5	mRNA	0.00693	0.00194	0.146
miR-149_AC010420.1	lncRNA	0.00702	0.141	0.146
miR-5190_LINC02434	lncRNA	0.00763	0.2	0.731
miR-3138_AP000593.2	pseudogene	0.00775	0.854	0.841
miR-3192_LPP-AS1	lncRNA	0.00786	0.414	0.0135
miR-3165_LHX1-DT	lncRNA	0.00795	0.926	0.489
miR-4728_AL160286.3	lncRNA	0.00837	0.323	0.593
miR-1205_HNRNPA1P70	pseudogene	0.00844	0.619	0.0121
miR-7156_SPPL2C	mRNA	0.00967	0.0594	0.598
miR-149_AC108688.1	pseudogene	0.00984	0.0584	0.146

## Sheet: COAD
miRNA_RNA pair	type of RNA in the pair	p-value of miRNA-RNA pair	p-value of RNA	p-value of miRNA
miR-604_AL162426.1	lncRNA	0.000187	0.437	0.673
miR-3679_RPL26P29	pseudogene	0.000312	0.0132	0.817
miR-6835_AC037459.2	lncRNA	0.000775	0.982	0.0294
miR-1245A_AC009065.3	lncRNA	0.00117	0.635	0.998
miR-5194_AC066613.2	lncRNA	0.00151	0.312	0.161
miR-3131_SERINC5	mRNA	0.00197	0.27	0.604
miR-4296_RPL23AP50	pseudogene	0.00239	0.654	0.0252
miR-4538_KCTD3	mRNA	0.00247	0.0702	0.663
miR-581_SNX31	mRNA	0.00348	0.557	0.872
miR-4637_CYP4A11	mRNA	0.00552	0.434	0.936
miR-581_AL162426.1	lncRNA	0.00569	0.437	0.872
miR-3149_DDX46	mRNA	0.00746	0.179	0.648
miR-3131_AC093673.1	lncRNA	0.00749	0.482	0.604
miR-4296_FDPSP7	pseudogene	0.00773	0.364	0.0252
miR-6784_SLC26A8	mRNA	0.00846	0.125	0.158
miR-593_AC016027.3	lncRNA	0.00946	0.82	0.454
miR-5687_AC008781.2	lncRNA	0.00988	0.858	0.756
miR-548AQ_ST20-MTHFS	mRNA	0.00993	0.0673	0.982

## Sheet: HNSC
miRNA_RNA pair	type of RNA in the pair	p-value of miRNA-RNA pair	p-value of RNA	p-value of miRNA
miR-4539_KRTAP10-2	mRNA	0.000185	0.303	0.00163
miR-6730_LINC01435	lncRNA	0.000978	0.0104	0.00321
miR-5195_AL390067.1	lncRNA	0.00107	0.0872	0.0344
miR-4539_NDRG3	mRNA	0.00389	0.541	0.00163
miR-4539_ARSEP1	pseudogene	0.00401	0.224	0.00163
miR-196A1_FAM120C	mRNA	0.0043	0.626	0.719
miR-4653_AC068473.3	lncRNA	0.00475	0.102	0.929
miR-1291_GC	mRNA	0.00511	0.181	0.259
miR-200B_ICAM5	mRNA	0.00634	0.893	0.45
miR-3936_SOX21	mRNA	0.00653	0.00432	0.195
miR-5587_AC097451.1	lncRNA	0.0085	0.112	0.266
miR-3936_EID2B	mRNA	0.00898	0.185	0.195

## Sheet: LUAD
miRNA_RNA pair	type of RNA in the pair	p-value of miRNA-RNA pair	p-value of RNA	p-value of miRNA
miR-581_LINC00628	lncRNA	4.72e-07	0.0193	0.874
miR-7848_AC087588.2	lncRNA	2.22e-06	1.75e-05	0.751
miR-3680-1_AL138789.1	lncRNA	1.3e-05	0.0239	0.537
miR-3671_RNF41	mRNA	1.32e-05	0.184	0.213
miR-3680-1_LINC00628	lncRNA	1.34e-05	0.0193	0.537
miR-186_LRMDA	mRNA	1.54e-05	0.303	0.00364
miR-34C_TFAP2A	mRNA	1.69e-05	0.00167	0.108
miR-186_TNFSF13	mRNA	2.03e-05	0.922	0.00364
miR-186_BEX4	mRNA	2.06e-05	0.00106	0.00364
miR-186_CD81	mRNA	3.21e-05	0.338	0.00364
miR-34C_NUP62CL	mRNA	3.49e-05	0.0559	0.108
miR-548V_AL138789.1	lncRNA	4.95e-05	0.0239	0.802
miR-215_AC026462.3	lncRNA	5.08e-05	0.132	0.136
miR-215_CLCA3P	pseudogene	5.45e-05	0.0334	0.136
miR-199A1_AL138789.1	lncRNA	7.29e-05	0.0239	0.851
miR-5690_CAB39P1	pseudogene	7.66e-05	0.00527	0.989
miR-5194_DSG4	mRNA	8.14e-05	0.00358	0.656
miR-5581_ZNF662	mRNA	8.64e-05	0.371	0.132
miR-4802_FGF12-AS2	lncRNA	9.21e-05	0.167	0.882
miR-34B_IL22RA1	mRNA	9.38e-05	0.235	0.994
miR-186_HLA-DRA	mRNA	0.000105	0.134	0.00364
miR-624_LINC01833	lncRNA	0.000115	0.016	0.819
miR-186_CYP27A1	mRNA	0.000116	0.025	0.00364
miR-186_PPM1M	mRNA	0.000119	0.0454	0.00364
miR-5581_PPM1M	mRNA	0.000125	0.0454	0.132
miR-579_AC103740.2	lncRNA	0.00013	0.104	0.252
miR-5581_TNFSF12	mRNA	0.000135	0.355	0.132
miR-553_LINC00628	lncRNA	0.000141	0.0193	0.0245
miR-34C_IL22RA1	mRNA	0.000151	0.235	0.108
miR-624_LINC00628	lncRNA	0.000151	0.0193	0.819
miR-429_TMEM167B	mRNA	0.000167	0.4	0.306
miR-215_DSG4	mRNA	0.000171	0.00358	0.136
miR-5581_CD300LF	mRNA	0.000175	0.0977	0.132
miR-4312_AL450345.1	lncRNA	0.000193	0.624	0.73
miR-186_KNTC1	mRNA	0.000207	0.0373	0.00364
miR-148B_AC090192.2	lncRNA	0.000218	0.112	0.273
miR-4639_CAB39P1	pseudogene	0.000242	0.00527	0.0193
miR-34C_SERPINB5	mRNA	0.000245	0.0061	0.108
miR-4324_AC013410.1	pseudogene	0.000273	0.288	0.724
miR-571_VAX1	mRNA	0.000299	0.75	0.382
miR-6757_AL138789.1	lncRNA	0.000309	0.0239	0.261
miR-4782_AL450345.1	lncRNA	0.000309	0.624	0.501
miR-1255A_LINC00628	lncRNA	0.000316	0.0193	0.974
miR-553_VAX1	mRNA	0.00033	0.75	0.0245
miR-624_C1orf105	mRNA	0.000332	0.104	0.819
miR-215_AC135166.1	lncRNA	0.000357	0.728	0.136
miR-4312_SIRLNT	lncRNA	0.00036	0.773	0.73
miR-3138_VAX1	mRNA	0.000383	0.75	0.563
miR-196A1_AC016999.1	lncRNA	0.000395	0.11	0.927
miR-3657_LINC01312	lncRNA	0.000424	0.148	0.957
miR-1972-1_VAX1	mRNA	0.000431	0.75	0.738
miR-581_VAX1	mRNA	0.00045	0.75	0.874
miR-548V_AL023755.1	lncRNA	0.000476	0.556	0.802
miR-215_AC069499.2	pseudogene	0.000477	0.111	0.136
miR-30C2_BTK	mRNA	0.000478	0.13	0.879
miR-219A1_PAQR9-AS1	lncRNA	0.000488	0.337	0.481
miR-624_NEK2P4	pseudogene	0.000504	0.13	0.819
miR-4538_AF130417.1	lncRNA	0.000511	0.186	0.343
miR-643_VAX1	mRNA	0.00052	0.75	0.345
miR-4312_AL049775.2	lncRNA	0.000529	0.736	0.73
miR-34B_LINC00240	lncRNA	0.000534	0.00507	0.994
miR-5690_SP9	mRNA	0.000555	0.672	0.989
miR-23B_DHX37	mRNA	0.000556	0.0464	0.393
miR-4782_LINC00628	lncRNA	0.000563	0.0193	0.501
miR-4802_AL138789.1	lncRNA	0.000566	0.0239	0.882
miR-186_PLA2G15	mRNA	0.000568	0.95	0.00364
miR-186_PPM1G	mRNA	0.000597	0.21	0.00364
miR-148B_CAB39P1	pseudogene	0.000623	0.00527	0.273
miR-4766_NPM1P32	pseudogene	0.000624	0.00379	0.308
miR-3907_PSMD10P2	pseudogene	0.000661	0.261	0.469
miR-3609_LINC00628	lncRNA	0.000662	0.0193	0.732
miR-5581_ZIC2	mRNA	0.000703	0.457	0.132
miR-4802_AP003419.1	mRNA	0.000743	0.00184	0.882
miR-579_DSG4	mRNA	0.000753	0.00358	0.252
miR-181B2_VAX1	mRNA	0.000761	0.75	0.29
miR-LET7F1_AL138789.1	lncRNA	0.000771	0.0239	0.355
miR-4537_LINC00628	lncRNA	0.000775	0.0193	0.915
miR-1972-1_AC012213.1	lncRNA	0.000806	0.0805	0.738
miR-4539_AC108688.1	pseudogene	0.000806	0.477	0.0469
miR-34C_LINC02826	lncRNA	0.00081	0.23	0.108
miR-1255A_VAX1	mRNA	0.000812	0.75	0.974
miR-186_B3GNT8	mRNA	0.000815	0.222	0.00364
miR-548V_AC013286.1	lncRNA	0.000816	0.775	0.802
miR-5581_CD81	mRNA	0.000835	0.338	0.132
miR-624_NPM1P32	pseudogene	0.000869	0.00379	0.819
miR-421_ATAD5	mRNA	0.00089	0.123	0.223
miR-1205_AC092953.1	pseudogene	0.000932	0.603	0.328
miR-4802_AC090192.2	lncRNA	0.000937	0.112	0.882
miR-3677_AC090181.2	lncRNA	0.000948	0.444	0.556
miR-34C_ADGRF4	mRNA	0.000952	0.0927	0.108
miR-215_HOXA13	mRNA	0.000987	0.384	0.136
miR-1296_FETUB	mRNA	0.000993	0.0651	0.649
miR-548V_CAB39P1	pseudogene	0.000995	0.00527	0.802
miR-23A_MOAP1	mRNA	0.00101	0.0812	0.607
miR-554_UCN2	mRNA	0.00101	0.00317	0.94
miR-1285-1_DBF4B	mRNA	0.00103	0.373	0.0909
miR-215_VAX1	mRNA	0.00104	0.75	0.136
miR-186_PEF1	mRNA	0.00104	0.402	0.00364
miR-LET7D_POU6F1	mRNA	0.00106	0.0809	0.473
miR-34B_TACC3	mRNA	0.00107	0.0168	0.994
miR-215_NXPH1	mRNA	0.00108	0.251	0.136
miR-4677_IGKV1OR2-1	pseudogene	0.00112	0.468	0.578
miR-34B_NUP62CL	mRNA	0.00113	0.0559	0.994
miR-548V_IFNL2	mRNA	0.00113	0.694	0.802
miR-548AR_FETUB	mRNA	0.00118	0.0651	0.0994
miR-3617_AP000679.1	lncRNA	0.00118	0.236	0.472
miR-571_LINC00628	lncRNA	0.00119	0.0193	0.382
miR-199A1_AC012213.1	lncRNA	0.00121	0.0805	0.851
miR-1255A_AL138789.1	lncRNA	0.00123	0.0239	0.974
miR-215_LINC01775	lncRNA	0.00126	0.0472	0.136
miR-4538_AP004607.7	pseudogene	0.0013	0.304	0.343
miR-1285-1_MYO19	mRNA	0.0013	0.0141	0.0909
miR-4730_LARP1P1	pseudogene	0.00132	0.54	0.51
miR-186_UPRT	mRNA	0.00137	0.691	0.00364
miR-6819_VAX1	mRNA	0.00137	0.75	0.465
miR-3140_LINC00460	lncRNA	0.0014	0.0248	0.957
miR-5188_S100A7	mRNA	0.0014	0.745	0.288
miR-624_UCN2	mRNA	0.00142	0.00317	0.819
miR-3617_VAX1	mRNA	0.00142	0.75	0.472
miR-5690_LINC02109	lncRNA	0.00144	0.253	0.989
miR-3136_CAB39P1	pseudogene	0.00147	0.00527	0.358
miR-23C_AC012213.4	lncRNA	0.00148	0.0263	0.166
miR-3135B_HOXA13	mRNA	0.00151	0.384	0.101
miR-6757_RNA5SP174	pseudogene	0.00153	0.546	0.261
miR-4257_PSG3	mRNA	0.00154	0.244	0.666
miR-3680-1_HIST1H2AL	mRNA	0.00157	0.043	0.537
miR-1270_PCNPP3	pseudogene	0.00158	0.00362	0.81
miR-548V_LHX1-DT	lncRNA	0.00165	0.316	0.802
miR-6081_C1orf105	mRNA	0.00169	0.104	0.849
miR-186_FCGRT	mRNA	0.00171	0.414	0.00364
miR-186_ATP6V0D1	mRNA	0.00173	0.482	0.00364
miR-6832_GAPDHP68	pseudogene	0.00173	0.0157	0.836
miR-1285-1_CD81	mRNA	0.00173	0.338	0.0909
miR-6719_AC103740.2	lncRNA	0.00174	0.104	0.0714
miR-34B_DSG4	mRNA	0.00179	0.00358	0.994
miR-5692C2_PAQR9-AS1	lncRNA	0.0018	0.337	0.516
miR-491_LINC00536	lncRNA	0.00181	0.121	0.893
miR-644A_C1orf105	mRNA	0.00181	0.104	0.505
miR-4538_LIN28B	mRNA	0.00184	0.312	0.343
miR-624_AC027088.3	lncRNA	0.00187	0.0835	0.819
miR-548V_ADAM18	mRNA	0.00187	0.575	0.802
miR-215_AL138789.1	lncRNA	0.00188	0.0239	0.136
miR-3136_FETUB	mRNA	0.00189	0.0651	0.358
miR-186_TYROBP	mRNA	0.00189	0.794	0.00364
miR-1972-1_RNA5SP323	pseudogene	0.00191	0.0091	0.738
miR-4768_AL138789.1	lncRNA	0.00193	0.0239	0.687
miR-6812_CASP14	mRNA	0.00193	0.0611	0.925
miR-186_RNF41	mRNA	0.00197	0.184	0.00364
miR-548V_FETUB	mRNA	0.00199	0.0651	0.802
miR-1255A_AC026462.3	lncRNA	0.002	0.132	0.974
miR-34C_EFCAB11	mRNA	0.00204	0.0423	0.108
miR-200B_AC090192.2	lncRNA	0.00206	0.112	0.573
miR-624_DLX2	mRNA	0.0021	0.00517	0.819
miR-23C_UCN2	mRNA	0.0021	0.00317	0.166
miR-30C2_NPC2	mRNA	0.00213	0.0498	0.879
miR-3942_CAB39P1	pseudogene	0.00213	0.00527	0.0121
miR-4312_C11orf44	lncRNA	0.00215	0.292	0.73
miR-4324_AC002381.1	pseudogene	0.00218	0.341	0.724
miR-571_LIPK	mRNA	0.00221	0.0837	0.382
miR-3617_GAPDHP68	pseudogene	0.00221	0.0157	0.472
miR-4742_FETUB	mRNA	0.00221	0.0651	0.589
miR-4312_LHX1-DT	lncRNA	0.00222	0.316	0.73
miR-199A1_C11orf44	lncRNA	0.00222	0.292	0.851
miR-3149_AC104763.2	pseudogene	0.00223	0.856	0.0252
miR-624_AC116562.1	pseudogene	0.00226	0.886	0.819
miR-624_FETUB	mRNA	0.00227	0.0651	0.819
miR-LET7F1_DEFB131E	pseudogene	0.00229	0.0298	0.355
miR-657_AL390718.1	lncRNA	0.00231	0.714	0.365
miR-186_KIF1C	mRNA	0.00239	0.958	0.00364
miR-148B_LINC00628	lncRNA	0.00244	0.0193	0.273
miR-186_TUSC2	mRNA	0.00247	0.0205	0.00364
miR-645_CYP2U1	mRNA	0.00247	0.298	0.723
miR-34B_EFCAB11	mRNA	0.00247	0.0423	0.994
miR-27B_HLA-DMA	mRNA	0.00251	0.194	0.115
miR-6081_HOXA13	mRNA	0.00251	0.384	0.849
miR-3186_VAX1	mRNA	0.00253	0.75	0.197
miR-548O_RNA5SP174	pseudogene	0.00257	0.546	0.388
miR-5188_ABCB10P4	pseudogene	0.00258	0.107	0.288
miR-3617_LINC01910	lncRNA	0.00259	0.00045	0.472
miR-624_LINC02826	lncRNA	0.0026	0.23	0.819
miR-581_DSG4	mRNA	0.00262	0.00358	0.874
miR-199A1_AL450345.1	lncRNA	0.00266	0.624	0.851
miR-1972-1_AC012213.4	lncRNA	0.00266	0.0263	0.738
miR-5685_CYP2U1	mRNA	0.0027	0.298	0.0714
miR-3174_ATAD5	mRNA	0.0027	0.123	0.137
miR-2355_AL161938.1	lncRNA	0.00275	0.938	0.758
miR-3136_LINC00628	lncRNA	0.00282	0.0193	0.358
miR-6895_IGHVII-60-1	pseudogene	0.00286	0.334	0.86
miR-186_U2SURP	mRNA	0.00292	0.709	0.00364
miR-3164_AC034223.1	lncRNA	0.00295	0.0904	0.405
miR-5581_BTK	mRNA	0.00303	0.13	0.132
miR-34C_RHOV	mRNA	0.00305	0.0625	0.108
miR-LET7D_ZRANB2-AS1	lncRNA	0.00305	0.0745	0.473
miR-186_IVD	mRNA	0.00306	0.223	0.00364
miR-8067_AC079296.1	lncRNA	0.00308	0.0463	0.459
miR-624_PSMD10P2	pseudogene	0.00308	0.261	0.819
miR-6895_UBE2SP2	pseudogene	0.00309	0.7	0.86
miR-624_GAPDHP73	pseudogene	0.00311	0.2	0.819
miR-646_AC008434.1	lncRNA	0.00312	0.42	0.381
miR-491_AC080129.1	lncRNA	0.00317	0.258	0.893
miR-186_RILP	mRNA	0.00317	0.862	0.00364
miR-3680-1_AC090192.2	lncRNA	0.00317	0.112	0.537
miR-576_AC022028.2	lncRNA	0.0032	0.0224	0.233
miR-646_AC091390.1	pseudogene	0.00324	0.00986	0.381
miR-571_PSMD10P2	pseudogene	0.00326	0.261	0.382
miR-148B_AC090502.3	pseudogene	0.00327	0.934	0.273
miR-148B_AL138789.1	lncRNA	0.00329	0.0239	0.273
miR-186_MGAT1	mRNA	0.00329	0.624	0.00364
miR-3149_HIST1H2BM	mRNA	0.00329	0.393	0.0252
miR-6081_TRIM15	mRNA	0.00332	0.0775	0.849
miR-548V_IRX4	mRNA	0.00335	0.556	0.802
miR-5581_GYPC	mRNA	0.00342	0.948	0.132
miR-215_SIRLNT	lncRNA	0.00344	0.773	0.136
miR-5194_CAB39P1	pseudogene	0.00346	0.00527	0.656
miR-624_HMGA1P1	pseudogene	0.00347	0.0643	0.819
miR-548O_AL450345.1	lncRNA	0.00348	0.624	0.388
miR-5690_AC080128.1	pseudogene	0.00351	0.911	0.989
miR-215_C11orf44	lncRNA	0.00352	0.292	0.136
miR-4312_OR1F1	mRNA	0.00352	0.784	0.73
miR-4740_LRFN4	mRNA	0.00354	0.0186	0.36
miR-4312_LHX3	mRNA	0.00362	0.173	0.73
miR-215_PTTG3P	pseudogene	0.00364	0.0431	0.136
miR-27B_GNGT2	mRNA	0.00365	0.775	0.115
miR-6819_AC034223.1	lncRNA	0.0037	0.0904	0.465
miR-3149_AL355607.2	lncRNA	0.0037	0.0809	0.0252
miR-186_ACAA1	mRNA	0.00371	0.341	0.00364
miR-3609_AC026462.3	lncRNA	0.00373	0.132	0.732
miR-27B_MCU	mRNA	0.00378	0.113	0.115
miR-624_LINC02109	lncRNA	0.00381	0.253	0.819
miR-554_LINC02029	lncRNA	0.00381	0.0118	0.94
miR-199A1_SIRLNT	lncRNA	0.00387	0.773	0.851
miR-34B_RIBC2	mRNA	0.00387	0.16	0.994
miR-657_RNA5SP174	pseudogene	0.0039	0.546	0.365
miR-6719_KLF2P4	pseudogene	0.00393	0.797	0.0714
miR-6895_AC010422.1	lncRNA	0.00393	0.113	0.86
miR-1285-1_GAPDHP60	pseudogene	0.00393	0.0134	0.0909
miR-646_AC026462.3	lncRNA	0.00398	0.132	0.381
miR-1296_CAB39P1	pseudogene	0.00398	0.00527	0.649
miR-199A1_AC026462.3	lncRNA	0.00404	0.132	0.851
miR-581_FETUB	mRNA	0.00407	0.0651	0.874
miR-186_SELENOW	mRNA	0.00409	0.0418	0.00364
miR-624_AC103740.2	lncRNA	0.00409	0.104	0.819
miR-624_AC026462.3	lncRNA	0.00414	0.132	0.819
miR-5692C2_AC090541.1	lncRNA	0.00414	0.227	0.516
miR-554_AC131009.2	lncRNA	0.00417	0.109	0.94
miR-4639_LINC02106	lncRNA	0.00424	0.868	0.0193
miR-4766_CAB39P1	pseudogene	0.00426	0.00527	0.308
miR-4782_AL138789.1	lncRNA	0.00428	0.0239	0.501
miR-199A1_HOXA10-AS	lncRNA	0.0043	0.612	0.851
miR-4802_ARNTL2-AS1	lncRNA	0.0043	0.147	0.882
miR-4802_LINC02313	lncRNA	0.00431	0.0085	0.882
miR-3680-1_KRT75	mRNA	0.00431	0.0201	0.537
miR-3942_GCNT1P4	pseudogene	0.00433	0.371	0.0121
miR-554_KLK6	mRNA	0.00434	0.182	0.94
miR-2355_AC012213.1	lncRNA	0.00434	0.0805	0.758
miR-4257_AC034223.1	lncRNA	0.00436	0.0904	0.666
miR-644A_AC090192.2	lncRNA	0.00437	0.112	0.505
miR-186_RSU1	mRNA	0.00439	0.9	0.00364
miR-6081_SP9	mRNA	0.00442	0.672	0.849
miR-548AR_DEFB131E	pseudogene	0.00442	0.0298	0.0994
miR-3178_VAX1	mRNA	0.00444	0.75	0.245
miR-548V_AC012213.1	lncRNA	0.00445	0.0805	0.802
miR-624_AC069499.2	pseudogene	0.00446	0.111	0.819
miR-4782_AC090192.2	lncRNA	0.0045	0.112	0.501
miR-5581_CRYL1	mRNA	0.00452	0.128	0.132
miR-5188_VPS26BP1	pseudogene	0.00456	0.155	0.288
miR-5581_AC022509.2	lncRNA	0.00457	0.308	0.132
miR-548O_AL355607.2	lncRNA	0.00459	0.0809	0.388
miR-186_TNFSF12	mRNA	0.00464	0.355	0.00364
miR-6757_LHX1-DT	lncRNA	0.00465	0.316	0.261
miR-3136_AP000864.1	lncRNA	0.00465	0.369	0.358
miR-8071-1_ACNATP	pseudogene	0.00468	0.0193	0.126
miR-6757_DEFB131E	pseudogene	0.00469	0.0298	0.261
miR-6819_LINC01924	lncRNA	0.00471	0.727	0.465
miR-3657_PCMTD1P3	pseudogene	0.00473	0.384	0.957
miR-581_CAB39P1	pseudogene	0.00481	0.00527	0.874
miR-1972-1_DEFB131E	pseudogene	0.00482	0.0298	0.738
miR-186_TRIM35	mRNA	0.00484	0.727	0.00364
miR-27B_LINC00641	lncRNA	0.00487	0.294	0.115
miR-215_AC131009.2	lncRNA	0.00492	0.109	0.136
miR-374B_IQCM	mRNA	0.00493	0.649	0.0383
miR-553_FDPSP8	pseudogene	0.00504	0.0443	0.0245
miR-624_AC139722.1	lncRNA	0.00508	0.222	0.819
miR-1972-1_RNA5SP174	pseudogene	0.00511	0.546	0.738
miR-6757_AC135166.1	lncRNA	0.00515	0.728	0.261
miR-5690_LINC00536	lncRNA	0.00515	0.121	0.989
miR-23B_AC102953.2	lncRNA	0.00521	0.0342	0.393
miR-3136_AC012213.4	lncRNA	0.00522	0.0263	0.358
miR-215_ZIC5	mRNA	0.00525	0.537	0.136
miR-5194_DEFB131E	pseudogene	0.0053	0.0298	0.656
miR-770_SPANXB1	mRNA	0.00531	0.571	0.978
miR-554_KRT8P14	pseudogene	0.00533	0.00402	0.94
miR-221_CDCA8	mRNA	0.00534	0.0735	0.536
miR-320C1_APOBEC1	mRNA	0.00534	0.156	0.831
miR-6757_NEUROG2	mRNA	0.00535	0.537	0.261
miR-LET7D_SNRPGP2	pseudogene	0.00535	0.317	0.473
miR-548V_AC022616.1	pseudogene	0.0054	0.99	0.802
miR-34C_DNAJC22	mRNA	0.00541	0.059	0.108
miR-4639_AC011840.1	lncRNA	0.00546	0.679	0.0193
miR-4537_AC034223.1	lncRNA	0.00547	0.0904	0.915
miR-215_LINC02313	lncRNA	0.00549	0.0085	0.136
miR-4639_AL138789.1	lncRNA	0.0055	0.0239	0.0193
miR-5188_AC005695.2	lncRNA	0.00552	0.308	0.288
miR-215_AC012213.1	lncRNA	0.00556	0.0805	0.136
miR-3136_LINC00994	lncRNA	0.00566	0.171	0.358
miR-4766_AC012213.4	lncRNA	0.00566	0.0263	0.308
miR-548V_HIST1H3J	mRNA	0.00568	0.87	0.802
miR-186_MTOR	mRNA	0.00572	0.137	0.00364
miR-6812_HOXA13	mRNA	0.00573	0.384	0.925
miR-548O_AC068228.1	lncRNA	0.00573	0.128	0.388
miR-4324_AC090502.2	lncRNA	0.00574	0.364	0.724
miR-646_SIRPG-AS1	lncRNA	0.00577	0.354	0.381
miR-548V_AC020922.1	mRNA	0.00578	0.334	0.802
miR-6819_AC090502.3	pseudogene	0.00579	0.934	0.465
miR-581_RNA5SP174	pseudogene	0.00581	0.546	0.874
miR-215_LINC00628	lncRNA	0.00582	0.0193	0.136
miR-3680-1_AC103740.2	lncRNA	0.00585	0.104	0.537
miR-548V_AC080129.1	lncRNA	0.00585	0.258	0.802
miR-186_SYS1	mRNA	0.00587	0.0533	0.00364
miR-624_VAX1	mRNA	0.00591	0.75	0.819
miR-553_GAPDHP22	pseudogene	0.00591	0.801	0.0245
miR-34C_PITX1	mRNA	0.00591	0.0364	0.108
miR-4537_FETUB	mRNA	0.00591	0.0651	0.915
miR-548O_SEPTIN14P12	pseudogene	0.00594	0.48	0.388
miR-4257_AC026462.3	lncRNA	0.00596	0.132	0.666
miR-6719_LINC00628	lncRNA	0.00597	0.0193	0.0714
miR-215_KCNJ4	mRNA	0.00602	0.0229	0.136
miR-2355_PSMD10P2	pseudogene	0.00606	0.261	0.758
miR-186_GYPC	mRNA	0.00606	0.948	0.00364
miR-4257_AP001970.1	lncRNA	0.00611	0.383	0.666
miR-LET7F1_RNA5SP174	pseudogene	0.00624	0.546	0.355
miR-215_AC090192.2	lncRNA	0.00625	0.112	0.136
miR-4766_AC012213.1	lncRNA	0.00629	0.0805	0.308
miR-215_LINC02826	lncRNA	0.00631	0.23	0.136
miR-6081_AC135166.1	lncRNA	0.00637	0.728	0.849
miR-186_TMEM9B	mRNA	0.00638	0.163	0.00364
miR-215_KRT18P60	pseudogene	0.00638	0.00343	0.136
miR-3617_RASGEF1C	mRNA	0.00641	0.0623	0.472
miR-548V_NEK2P4	pseudogene	0.00641	0.13	0.802
miR-8071-2_PKMYT1	mRNA	0.00642	0.0444	0.0739
miR-215_AP005233.2	lncRNA	0.00644	0.0774	0.136
miR-30C2_GPSM3	mRNA	0.00645	0.392	0.879
miR-4742_AP000864.1	lncRNA	0.0065	0.369	0.589
miR-199A1_AC016738.2	lncRNA	0.00651	0.00766	0.851
miR-196A1_AC159540.2	lncRNA	0.00651	0.157	0.927
miR-3671_MTOR	mRNA	0.00653	0.137	0.213
miR-571_AC080129.1	lncRNA	0.00656	0.258	0.382
miR-4766_AC091173.1	lncRNA	0.00657	0.0106	0.308
miR-374B_TMSB4X	mRNA	0.0066	0.619	0.0383
miR-34C_ADGRB2	mRNA	0.00663	0.0858	0.108
miR-548V_IFNL3	mRNA	0.00664	0.253	0.802
miR-646_UCN2	mRNA	0.00665	0.00317	0.381
miR-23A_AC243960.3	lncRNA	0.00665	0.267	0.607
miR-215_LINC02029	lncRNA	0.00666	0.0118	0.136
miR-34C_CHST6	mRNA	0.00667	0.285	0.108
miR-5692C2_AL355607.2	lncRNA	0.0067	0.0809	0.516
miR-1255A_RNA5SP323	pseudogene	0.00672	0.0091	0.974
miR-1296_AC068228.1	lncRNA	0.00673	0.128	0.649
miR-554_AC016877.3	lncRNA	0.00674	0.0871	0.94
miR-554_LINC02043	lncRNA	0.00677	0.157	0.94
miR-34C_TNS4	mRNA	0.00682	0.48	0.108
miR-3149_AC090502.3	pseudogene	0.00685	0.934	0.0252
miR-2355_RNA5SP174	pseudogene	0.00686	0.546	0.758
miR-646_AL353801.1	lncRNA	0.00687	0.228	0.381
miR-3186_DEFB131E	pseudogene	0.00688	0.0298	0.197
miR-624_AC080129.1	lncRNA	0.00697	0.258	0.819
miR-5690_AC108136.1	lncRNA	0.00698	0.103	0.989
miR-645_AC110760.2	lncRNA	0.007	0.261	0.723
miR-34B_HMGA2	mRNA	0.007	0.0254	0.994
miR-4312_AC012213.4	lncRNA	0.00704	0.0263	0.73
miR-548AR_LINC02029	lncRNA	0.00705	0.0118	0.0994
miR-548O_ZIC2	mRNA	0.00709	0.457	0.388
miR-4742_SP9	mRNA	0.00711	0.672	0.589
miR-5188_AC130895.1	lncRNA	0.00721	0.298	0.288
miR-553_APOBEC1	mRNA	0.00722	0.156	0.0245
miR-34C_HMGA2	mRNA	0.00724	0.0254	0.108
miR-6757_HLA-DPB1	mRNA	0.00727	0.0634	0.261
miR-4324_AL023755.1	lncRNA	0.00728	0.556	0.724
miR-548V_AC016723.1	lncRNA	0.00729	0.152	0.802
miR-624_AL033397.2	lncRNA	0.00735	0.118	0.819
miR-4768_LINC02310	lncRNA	0.00743	0.0882	0.687
miR-30C2_ECE2	mRNA	0.00746	0.183	0.879
miR-624_DEFB131E	pseudogene	0.00749	0.0298	0.819
miR-1302-3_AC016738.2	lncRNA	0.00752	0.00766	0.783
miR-186_CALR	mRNA	0.00752	0.534	0.00364
miR-6081_CAB39P1	pseudogene	0.00753	0.00527	0.849
miR-4539_PDHA1P1	pseudogene	0.00757	0.888	0.0469
miR-34C_TRIP13	mRNA	0.00764	0.0644	0.108
miR-548V_LINC01518	lncRNA	0.00768	0.665	0.802
miR-186_RNF185	mRNA	0.00768	0.35	0.00364
miR-5690_RNA5SP174	pseudogene	0.0077	0.546	0.989
miR-624_AL023755.1	lncRNA	0.00773	0.556	0.819
miR-3138_DEFB131E	pseudogene	0.00775	0.0298	0.563
miR-215_TLX1	mRNA	0.00776	0.104	0.136
miR-215_C20orf141	mRNA	0.00777	0.447	0.136
miR-3140_AC012157.2	lncRNA	0.00779	0.32	0.957
miR-2355_LINC02826	lncRNA	0.00784	0.23	0.758
miR-5194_AC135166.1	lncRNA	0.00785	0.728	0.656
miR-374B_DBF4B	mRNA	0.00787	0.373	0.0383
miR-34B_TRIP13	mRNA	0.00789	0.0644	0.994
miR-548V_FGF19	mRNA	0.00789	0.0464	0.802
miR-5188_ARHGAP26-IT1	lncRNA	0.00791	0.94	0.288
miR-548AR_AC069499.2	pseudogene	0.00792	0.111	0.0994
miR-324_DEFB131E	pseudogene	0.00803	0.0298	0.886
miR-4802_AC069499.2	pseudogene	0.0081	0.111	0.882
miR-491_C1orf105	mRNA	0.0081	0.104	0.893
miR-4312_SOX1-OT	lncRNA	0.00811	0.507	0.73
miR-LET7F1_AC092143.1	mRNA	0.00811	0.0512	0.355
miR-23C_LINC01833	lncRNA	0.00814	0.016	0.166
miR-1972-1_PGLYRP3	mRNA	0.00814	0.826	0.738
miR-374B_AC103809.1	lncRNA	0.00816	0.622	0.0383
miR-4312_AP001970.1	lncRNA	0.00822	0.383	0.73
miR-1296_AC011632.1	lncRNA	0.00822	0.668	0.649
miR-554_PDX1	mRNA	0.00826	0.525	0.94
miR-34B_RUVBL2	mRNA	0.00829	0.0617	0.994
miR-646_AC006480.1	pseudogene	0.00829	0.305	0.381
miR-4766_AP001178.1	lncRNA	0.00831	0.0117	0.308
miR-548AR_LINC00629	lncRNA	0.00833	0.335	0.0994
miR-200B_TLX1	mRNA	0.00834	0.104	0.573
miR-23C_AC090192.2	lncRNA	0.00841	0.112	0.166
miR-5194_SP9	mRNA	0.00843	0.672	0.656
miR-4802_AC016738.2	lncRNA	0.00843	0.00766	0.882
miR-4420_SP9	mRNA	0.00846	0.672	0.479
miR-3907_AC080129.1	lncRNA	0.00851	0.258	0.469
miR-643_AL138789.1	lncRNA	0.00854	0.0239	0.345
miR-200A_LINC01518	lncRNA	0.00855	0.665	0.139
miR-34B_TESMIN	mRNA	0.00856	0.166	0.994
miR-6757_FETUB	mRNA	0.00859	0.0651	0.261
miR-5188_SMAD1-AS2	lncRNA	0.00861	0.967	0.288
miR-554_MROH3P	pseudogene	0.00864	0.243	0.94
miR-148A_AC141273.2	pseudogene	0.00866	0.219	0.144
miR-646_TESC-AS1	lncRNA	0.00868	0.58	0.381
miR-199A1_KLF2P4	pseudogene	0.00868	0.797	0.851
miR-644A_FGF12-AS2	lncRNA	0.0087	0.167	0.505
miR-624_AC131009.2	lncRNA	0.00871	0.109	0.819
miR-4312_KRT33B	mRNA	0.00871	0.447	0.73
miR-215_TMPRSS11F	mRNA	0.00871	0.00125	0.136
miR-6071_HOXA6	mRNA	0.00874	0.325	0.798
miR-5188_FO393419.2	lncRNA	0.00875	0.787	0.288
miR-3135B_AC100793.1	pseudogene	0.00877	0.564	0.101
miR-3609_SP9	mRNA	0.00878	0.672	0.732
miR-2355_AC011611.2	lncRNA	0.00879	0.172	0.758
miR-34B_RHOV	mRNA	0.00881	0.0625	0.994
miR-8067_MTDHP4	pseudogene	0.00885	0.252	0.459
miR-4512_RPL7L1P8	pseudogene	0.00886	0.364	0.259
miR-624_GAL	mRNA	0.00893	0.0258	0.819
miR-181B2_AC026462.3	lncRNA	0.00902	0.132	0.29
miR-646_AC019206.1	pseudogene	0.00903	0.868	0.381
miR-199A1_AC015983.1	pseudogene	0.00903	0.587	0.851
miR-3617_LINC02313	lncRNA	0.00907	0.0085	0.472
miR-4312_CAB39P1	pseudogene	0.00909	0.00527	0.73
miR-491_AL033397.2	lncRNA	0.00909	0.118	0.893
miR-624_LINC02029	lncRNA	0.00911	0.0118	0.819
miR-548V_WASF1P1	pseudogene	0.00913	0.641	0.802
miR-5690_AC135166.1	lncRNA	0.00922	0.728	0.989
miR-148B_AC135166.1	lncRNA	0.00922	0.728	0.273
miR-5690_LIPK	mRNA	0.00924	0.0837	0.989
miR-5690_FETUB	mRNA	0.00925	0.0651	0.989
miR-657_RNA5SP323	pseudogene	0.00925	0.0091	0.365
miR-186_ATAD5	mRNA	0.00926	0.123	0.00364
miR-491_LIPK	mRNA	0.00928	0.0837	0.893
miR-222_LINC01312	lncRNA	0.0093	0.148	0.212
miR-624_AC090192.2	lncRNA	0.00935	0.112	0.819
miR-1972-1_LINC00628	lncRNA	0.00945	0.0193	0.738
miR-3135B_AP001207.2	pseudogene	0.00946	0.812	0.101
miR-3149_AL445523.1	pseudogene	0.00947	0.814	0.0252
miR-2355_LINC01629	lncRNA	0.00952	0.0509	0.758
miR-604_AP003419.1	mRNA	0.00969	0.00184	0.58
miR-624_C1QL4	mRNA	0.00969	0.178	0.819
miR-30C2_CD74	mRNA	0.00972	0.511	0.879
miR-4537_RNA5SP323	pseudogene	0.00977	0.0091	0.915
miR-3136_DLX1	mRNA	0.00981	0.0587	0.358
miR-3680-1_HASPIN	mRNA	0.00988	0.0182	0.537
miR-374B_AKAP7	mRNA	0.00995	0.799	0.0383
miR-3140_AF213884.1	pseudogene	0.00999	0.995	0.957

## Sheet: LUSC
miRNA_RNA pair	type of RNA in the pair	p-value of miRNA-RNA pair	p-value of RNA	p-value of miRNA
miR-548Z_PNLIPRP2	pseudogene	0.000118	0.318	0.000664
miR-3972_CSAG4	pseudogene	0.000149	0.517	0.474
miR-146B_PHETA2	mRNA	0.000149	0.0478	0.276
miR-6832_DCAF8L1	mRNA	0.000159	0.00121	0.394
miR-548Z_AC020658.4	lncRNA	0.000178	0.0835	0.000664
miR-548AR_LINC02200	lncRNA	0.000242	0.000265	0.448
miR-593_UQCRBP2	pseudogene	0.000277	0.00245	0.423
miR-4477B_CCDC124	mRNA	0.000331	0.075	0.000225
miR-429_MIF4GD	mRNA	0.000489	0.549	0.108
miR-23B_MBNL2	mRNA	0.000543	0.000277	0.881
miR-4539_AP001476.3	lncRNA	0.00138	0.00862	0.217
miR-6819_DEFA5	mRNA	0.00142	0.0721	0.118
miR-590_AC007000.2	pseudogene	0.00199	0.0922	0.457
miR-548Z_AC010655.4	lncRNA	0.002	0.0562	0.000664
miR-4782_HTR3B	mRNA	0.00215	0.382	0.761
miR-708_AC008805.1	pseudogene	0.00219	0.333	0.152
miR-548Z_RPL12P30	pseudogene	0.00231	0.103	0.000664
miR-6867_LINC01994	lncRNA	0.00235	0.00473	0.326
miR-3174_PTH	mRNA	0.00297	0.0405	0.264
miR-4513_PES1P1	pseudogene	0.00351	0.00151	0.287
miR-LET7D_TARDBP	mRNA	0.00372	0.00267	0.756
miR-4782_AL161757.5	lncRNA	0.00372	0.012	0.761
miR-6870_LINC01707	lncRNA	0.00383	0.121	0.713
miR-5581_ZNF32-AS1	lncRNA	0.00439	0.292	0.8
miR-3174_TNP1	mRNA	0.00442	0.0113	0.264
miR-548Z_SHCBP1L	mRNA	0.00445	0.909	0.000664
miR-4782_LINC01054	lncRNA	0.00449	0.148	0.761
miR-4639_AC138965.1	lncRNA	0.0045	0.00612	0.0465
miR-3174_AP000997.2	lncRNA	0.00451	0.00904	0.264
miR-3174_AC015522.1	lncRNA	0.00453	0.00125	0.264
miR-135B_GFY	mRNA	0.00457	0.0165	0.852
miR-548Z_LINC01971	lncRNA	0.00462	0.242	0.000664
miR-548Z_AC078785.2	lncRNA	0.00472	0.688	0.000664
miR-3174_AC007493.1	lncRNA	0.00476	0.326	0.264
miR-3174_AC105185.1	pseudogene	0.00479	0.0743	0.264
miR-3186_CPN1	mRNA	0.00503	0.00103	0.538
miR-8071-1_PES1P1	pseudogene	0.00515	0.00151	0.0935
miR-3164_PPY2P	pseudogene	0.0053	0.0321	0.262
miR-548Z_AC091946.2	lncRNA	0.0055	0.227	0.000664
miR-3174_AC120498.7	pseudogene	0.00559	0.0851	0.264
miR-4539_PABPC1L2A	mRNA	0.00564	0.011	0.217
miR-3174_SLCO1B7	mRNA	0.0057	0.00692	0.264
miR-4539_AC103855.3	lncRNA	0.00576	0.51	0.217
miR-429_AL096803.2	lncRNA	0.00602	0.371	0.108
miR-6814_CPN1	mRNA	0.00616	0.00103	0.15
miR-3174_LINC01445	lncRNA	0.00618	0.165	0.264
miR-378A_PPIAP53	pseudogene	0.00636	0.773	0.22
miR-548Z_AP002387.1	pseudogene	0.0065	0.17	0.000664
miR-4782_AL157414.1	lncRNA	0.00661	0.203	0.761
miR-4539_LINC01895	lncRNA	0.00681	0.0049	0.217
miR-23A_SRRT	mRNA	0.00683	0.000133	0.0718
miR-6819_LINC01707	lncRNA	0.00718	0.121	0.118
miR-548Z_AC010307.4	lncRNA	0.00735	0.45	0.000664
miR-590_SSBP3-AS1	lncRNA	0.00736	0.729	0.457
miR-5587_LINC01016	lncRNA	0.00739	0.254	0.483
miR-186_LYG2	mRNA	0.0074	0.0303	0.36
miR-4513_miR-124-2HG	lncRNA	0.0076	0.000335	0.287
miR-LET7D_S1PR2	mRNA	0.00817	0.0494	0.756
miR-548Z_SLX1A	mRNA	0.0088	0.322	0.000664
miR-4701_B3GAT2	mRNA	0.0089	0.0173	0.784
miR-3164_AC138965.1	lncRNA	0.00908	0.00612	0.262
miR-548Z_TMEM207	mRNA	0.00931	0.113	0.000664
miR-4539_LCE2B	mRNA	0.00951	0.000775	0.217

## Sheet: STAD
miRNA_RNA pair	type of RNA in the pair	p-value of miRNA-RNA pair	p-value of RNA	p-value of miRNA
miR-604_OLFML3	mRNA	1e-05	0.0479	0.492
miR-554_OR10A5	mRNA	4.04e-05	0.00473	0.0585
miR-149_OR10A5	mRNA	0.000169	0.00473	0.885
miR-8071-1_SLC5A6	mRNA	0.000261	0.0203	0.0851
miR-4511_OR10A5	mRNA	0.000269	0.00473	0.787
miR-587_AC011753.1	pseudogene	0.000309	0.27	0.0504
miR-222_OR10A5	mRNA	0.000338	0.00473	0.728
miR-6728_AL133371.1	lncRNA	0.000485	0.741	0.991
miR-3117_EIF2B1	mRNA	0.000529	0.0361	0.171
miR-604_CTSF	mRNA	0.000641	0.971	0.492
miR-520C_AC016700.3	lncRNA	0.000778	0.475	0.995
miR-149_KRTAP24-1	mRNA	0.000816	0.197	0.885
miR-181B2_SIAE	mRNA	0.000857	0.334	0.261
miR-378J_LINC01194	lncRNA	0.000935	0.414	0.0693
miR-554_PPIAP24	pseudogene	0.000995	0.742	0.0585
miR-587_SAPCD2P1	pseudogene	0.00102	0.025	0.0504
miR-646_MRPS12	mRNA	0.00105	0.701	0.149
miR-3619_ERICH3-AS1	lncRNA	0.00108	0.000926	0.882
miR-604_CDS2	mRNA	0.00112	0.382	0.492
miR-3164_AC105224.1	pseudogene	0.00114	0.16	0.956
miR-6814_XKR3	mRNA	0.00131	0.428	0.536
miR-23A_BTBD19	mRNA	0.00149	0.124	0.651
miR-613_AJ003147.2	lncRNA	0.00151	0.00991	0.263
miR-5687_OR7E47P	pseudogene	0.00154	0.0542	0.0941
miR-4428_ERICH3-AS1	lncRNA	0.00159	0.000926	0.0975
miR-6763_PCDHB9	mRNA	0.00161	0.346	0.288
miR-186_AC093520.2	pseudogene	0.0019	0.0184	0.397
miR-641_AC013509.1	lncRNA	0.0019	0.951	0.622
miR-4644_BX276092.7	pseudogene	0.00194	0.27	0.711
miR-6867_AC090809.1	lncRNA	0.00203	0.0325	0.525
miR-4524B_DPEP1	mRNA	0.00218	0.144	0.105
miR-7974_LINC00538	lncRNA	0.0022	0.291	0.508
miR-486-1_BOLA3P4	pseudogene	0.00224	0.0743	0.414
miR-219A1_ERICH3-AS1	lncRNA	0.00229	0.000926	0.59
miR-378J_AC093763.1	lncRNA	0.0023	0.594	0.0693
miR-2278_AL391422.3	lncRNA	0.00233	0.262	0.72
miR-4428_AC000081.1	pseudogene	0.00234	0.191	0.0975
miR-770_ADIPOR1	mRNA	0.00242	0.0173	0.549
miR-938_OR7E47P	pseudogene	0.00242	0.0542	0.654
miR-4428_C2orf83	mRNA	0.00247	0.585	0.0975
miR-4428_AC104073.3	pseudogene	0.00269	0.713	0.0975
miR-4428_LINC01416	lncRNA	0.00277	0.173	0.0975
miR-4787_AC009158.1	lncRNA	0.00287	0.0311	0.0285
miR-6757_CEP83-DT	lncRNA	0.00294	0.502	0.25
miR-604_EPB41L3	mRNA	0.00302	0.97	0.492
miR-5692A1_AC063923.1	pseudogene	0.00304	0.413	0.696
miR-613_AC106707.1	lncRNA	0.00313	0.496	0.263
miR-4428_AC136759.1	pseudogene	0.00321	0.000461	0.0975
miR-5192_LINC01520	lncRNA	0.00328	0.659	0.0699
miR-196A1_AC136759.1	pseudogene	0.00332	0.000461	0.0724
miR-5692A1_AC007610.3	pseudogene	0.00339	0.344	0.696
miR-554_AL353803.2	lncRNA	0.00342	0.125	0.0585
miR-181A2_RPS20P22	pseudogene	0.00344	0.0115	0.154
miR-27B_KCNQ1	mRNA	0.00354	0.0063	0.701
miR-4777_AC090541.1	lncRNA	0.00364	0.904	0.0767
miR-4787_HERC2P9	pseudogene	0.0037	0.046	0.0285
miR-520C_FNDC7	mRNA	0.00387	0.102	0.995
miR-4295_AC139491.3	lncRNA	0.00394	0.39	0.727
miR-604_PRRT4	mRNA	0.00395	0.0417	0.492
miR-149_OR2G6	mRNA	0.00405	0.375	0.885
miR-1249_LINC02064	lncRNA	0.00407	0.0712	0.695
miR-3685_IGKV2-29	pseudogene	0.00415	0.273	0.634
miR-4428_AC114757.1	lncRNA	0.00417	0.0754	0.0975
miR-554_LINC01490	lncRNA	0.00419	0.0681	0.0585
miR-657_AC073487.1	lncRNA	0.0043	0.681	0.197
miR-4530_HERC2P9	pseudogene	0.00432	0.046	0.991
miR-641_GH2	mRNA	0.00434	0.092	0.622
miR-4777_LINC01570	lncRNA	0.00441	0.000695	0.0767
miR-149_COX6B1P2	pseudogene	0.00445	0.26	0.885
miR-604_SYNPO2L	mRNA	0.00454	0.347	0.492
miR-181A2_UNC13D	mRNA	0.00462	0.655	0.154
miR-6728_BX276092.7	pseudogene	0.00489	0.27	0.991
miR-604_MRPL10	mRNA	0.00519	0.703	0.492
miR-770_EFNA3	mRNA	0.00523	0.0728	0.549
AC104450.1_KRTAP4-1	mRNA	0.00538	0.139	0.18
miR-604_C3orf18	mRNA	0.00549	0.753	0.492
miR-571_RPL34P19	pseudogene	0.00549	0.554	0.0232
miR-587_AC005323.1	lncRNA	0.00551	0.301	0.0504
miR-4706_LINC00392	lncRNA	0.00551	0.199	0.543
miR-7976_NEUROD4	mRNA	0.00571	0.4	0.244
miR-604_DGKK	mRNA	0.0059	0.141	0.492
miR-5000_AC020891.1	lncRNA	0.00594	0.369	0.146
miR-215_ALDH4A1	mRNA	0.0061	0.179	0.789
miR-4999_AC003101.2	lncRNA	0.00612	0.712	0.0694
miR-181B2_AC107909.2	lncRNA	0.00618	0.368	0.261
miR-486-1_AC025278.1	lncRNA	0.00624	0.0886	0.414
miR-32_AL513324.1	lncRNA	0.00629	0.0848	0.0547
miR-587_AC011352.3	lncRNA	0.00632	0.172	0.0504
miR-149_AL591419.1	pseudogene	0.00638	0.54	0.885
miR-1276_LINC00538	lncRNA	0.00643	0.291	0.193
miR-604_SBDSP1	pseudogene	0.00657	0.473	0.492
miR-1180_AC068473.2	lncRNA	0.00661	0.323	0.488
miR-27B_AC021491.4	lncRNA	0.00662	0.0773	0.701
miR-554_IPPKP1	pseudogene	0.00667	0.744	0.0585
miR-181B2_AC021752.1	lncRNA	0.00673	0.287	0.261
miR-125B2_CNGB3	mRNA	0.00676	0.0583	0.485
miR-4261_LINC01378	lncRNA	0.00686	0.927	0.336
miR-554_AC132186.1	pseudogene	0.00703	0.206	0.0585
miR-27B_PIK3CA	mRNA	0.00703	0.463	0.701
miR-4664_ZMYM5	mRNA	0.00705	0.615	0.327
miR-603_MAGEA4-AS1	lncRNA	0.00706	0.196	0.872
miR-644A_LINC00538	lncRNA	0.00709	0.291	0.108
miR-125B2_EPM2AIP1	mRNA	0.00716	0.0129	0.485
miR-4537_UCK2	mRNA	0.00718	0.0179	0.859
miR-8071-1_RBP1	mRNA	0.00737	0.281	0.0851
miR-587_RAB11FIP1P1	pseudogene	0.0074	0.505	0.0504
miR-4506_OR10A5	mRNA	0.00757	0.00473	0.545
miR-1276_RNMTL1P1	pseudogene	0.00762	0.946	0.193
miR-378J_CSAG4	pseudogene	0.00777	0.29	0.0693
miR-641_AC090283.1	lncRNA	0.00792	0.915	0.622
miR-4479_AC139491.3	lncRNA	0.00803	0.39	0.0713
miR-4257_KRTAP24-1	mRNA	0.00811	0.197	0.845
miR-604_AKTIP	mRNA	0.0085	0.229	0.492
miR-4428_AC005291.1	lncRNA	0.00857	0.55	0.0975
miR-4428_UQCRFS1P1	pseudogene	0.0086	0.719	0.0975
miR-587_LINC00276	lncRNA	0.00868	0.491	0.0504
miR-149_MED15P4	pseudogene	0.00874	0.709	0.885
miR-4701_VDAC1P6	pseudogene	0.00877	0.254	0.819
miR-4787_GCNT3	mRNA	0.00885	0.509	0.0285
miR-558_AC093763.1	lncRNA	0.00891	0.594	0.231
miR-3149_CCDC18-AS1	lncRNA	0.00897	0.453	0.0071
miR-4787_AL611929.1	lncRNA	0.00901	0.107	0.0285
miR-4257_LINC02294	lncRNA	0.00907	0.0852	0.845
miR-1249_RFC5P1	pseudogene	0.00915	0.0997	0.695
miR-4802_BCAT1	mRNA	0.00935	0.413	0.504
miR-1249_LINC02563	lncRNA	0.00937	0.0733	0.695
miR-604_PPP1R1A	mRNA	0.0095	0.111	0.492
miR-181A2_TMEM145	mRNA	0.00955	0.354	0.154
miR-149_AC090283.1	lncRNA	0.00959	0.915	0.885
miR-587_DUXAP3	pseudogene	0.00963	0.513	0.0504
miR-554_OR7C2	mRNA	0.00968	0.971	0.0585
miR-8071-1_EPM2AIP1	mRNA	0.00974	0.0129	0.0851
miR-26B_RPA1	mRNA	0.00984	0.0221	0.228
miR-203A_CYP11B2	mRNA	0.00984	0.452	0.577

## Sheet: THCA
miRNA_RNA pair	type of RNA in the pair	p-value of miRNA-RNA pair	p-value of RNA	p-value of miRNA
miR-5685_GADD45A	mRNA	0.00349	0.792	0.259
miR-6784_AC093281.2	lncRNA	0.00376	0.593	0.0556
miR-8071-2_CFB	mRNA	0.00399	0.0139	0.949
miR-4537_CFB	mRNA	0.00404	0.0139	0.466
miR-6784_AC092295.1	lncRNA	0.00428	0.964	0.0556
miR-146B_GLI3	mRNA	0.00445	0.0629	0.101
miR-5195_CFB	mRNA	0.00543	0.0139	0.454
miR-146B_AC006450.3	lncRNA	0.00559	0.981	0.101
miR-7156_C17orf99	mRNA	0.00561	0.353	0.357
miR-27B_AP001992.1	pseudogene	0.00594	0.416	0.029
miR-146B_RPL17P41	pseudogene	0.00594	0.372	0.101
miR-146B_AL359313.1	lncRNA	0.00641	0.0678	0.101
miR-146B_RNASE11	mRNA	0.00686	0.0606	0.101
miR-146B_AL391069.3	lncRNA	0.0073	0.503	0.101
miR-3186_SRSF11	mRNA	0.00743	0.219	0.391
miR-146B_LINC00303	lncRNA	0.00794	0.257	0.101
miR-146B_SLC22A12	mRNA	0.00862	1	0.101
miR-5581_AP2M1	mRNA	0.00958	0.633	0.381
