# Supplementary material for: Predicting lymph node metastasis and prognosis of individual cancer patients based on miRNA-mediated RNA interactions
Source: BMC Med Genomics. 2022 Apr 17;15(Suppl 1):87. doi: 10.1186/s12920-022-01231-x (PMC9014599; doi:10.1186/s12920-022-01231-x)
Supplement: Supplementary file 3 — Additional file 3. TCGA barcodes of all normal samples and tumor samples studied in our work. [file 12920_2022_1231_MOESM3_ESM.xlsx]

## Sheet: BRCA
TCGA barcode
TCGA-BH-A0BC-11A-22R-A089-07
TCGA-BH-A0HA-11A-31R-A12P-07
TCGA-E2-A1LB-11A-22R-A144-07
TCGA-E2-A1LH-11A-22R-A14D-07
TCGA-E2-A1BC-11A-32R-A12P-07
TCGA-E9-A1NF-11A-73R-A14D-07
TCGA-E9-A1N9-11A-71R-A14D-07
TCGA-BH-A0H5-11A-62R-A115-07
TCGA-BH-A0DT-11A-12R-A12D-07
TCGA-A7-A0CH-11A-32R-A089-07
TCGA-E9-A1NG-11A-52R-A14M-07
TCGA-BH-A1FR-11B-42R-A13Q-07
TCGA-BH-A1FB-11A-33R-A13Q-07
TCGA-E2-A15I-11A-32R-A137-07
TCGA-E9-A1N5-11A-41R-A14D-07
TCGA-BH-A209-11A-42R-A157-07
TCGA-BH-A18P-11A-43R-A12D-07
TCGA-BH-A1EV-11A-24R-A137-07
TCGA-A7-A13F-11A-42R-A12P-07
TCGA-A7-A0CE-11A-21R-A089-07
TCGA-BH-A0AU-11A-11R-A12P-07
TCGA-E9-A1N4-11A-33R-A14M-07
TCGA-BH-A0E0-11A-13R-A089-07
TCGA-BH-A0BM-11A-12R-A089-07
TCGA-BH-A0DG-11A-43R-A12P-07
TCGA-BH-A208-11A-51R-A157-07
TCGA-BH-A1FC-11A-32R-A13Q-07
TCGA-BH-A1FU-11A-23R-A14D-07
TCGA-BH-A1F6-11B-94R-A13Q-07
TCGA-BH-A1EN-11A-23R-A13Q-07
TCGA-BH-A18U-11A-23R-A12D-07
TCGA-A7-A0DC-11A-41R-A089-07
TCGA-BH-A18L-11A-42R-A12D-07
TCGA-BH-A0BJ-11A-23R-A089-07
TCGA-BH-A1FD-11B-21R-A13Q-07
TCGA-BH-A1FN-11A-34R-A13Q-07
TCGA-BH-A18Q-11A-34R-A12D-07
TCGA-E9-A1RC-11A-33R-A157-07
TCGA-BH-A0BW-11A-12R-A115-07
TCGA-AC-A2FF-11A-13R-A17B-07
TCGA-BH-A18N-11A-43R-A12D-07
TCGA-AC-A2FB-11A-13R-A17B-07
TCGA-E9-A1R7-11A-42R-A14M-07
TCGA-BH-A0DD-11A-23R-A12P-07
TCGA-E2-A15K-11A-13R-A12P-07
TCGA-AC-A2FM-11B-32R-A19W-07
TCGA-E9-A1RH-11A-34R-A169-07
TCGA-BH-A0BV-11A-31R-A089-07
TCGA-BH-A204-11A-53R-A157-07
TCGA-BH-A1FG-11B-12R-A13Q-07
TCGA-BH-A1EO-11A-31R-A137-07
TCGA-BH-A0H9-11A-22R-A466-07
TCGA-A7-A13G-11A-51R-A13Q-07
TCGA-BH-A0B7-11A-34R-A115-07
TCGA-E2-A1LS-11A-32R-A157-07
TCGA-BH-A1F2-11A-32R-A13Q-07
TCGA-BH-A0DV-11A-22R-A12P-07
TCGA-BH-A1FJ-11B-42R-A13Q-07
TCGA-BH-A1FH-11B-42R-A13Q-07
TCGA-BH-A0AY-11A-23R-A089-07
TCGA-BH-A18R-11A-42R-A12D-07
TCGA-GI-A2C9-11A-22R-A21T-07
TCGA-BH-A1F8-11B-21R-A13Q-07
TCGA-BH-A0DP-11A-12R-A089-07
TCGA-BH-A0DQ-11A-12R-A089-07
TCGA-BH-A0HK-11A-11R-A089-07
TCGA-BH-A0C0-11A-21R-A089-07
TCGA-BH-A0H7-11A-13R-A089-07
TCGA-BH-A18K-11A-13R-A12D-07
TCGA-BH-A0AZ-11A-22R-A12P-07
TCGA-E9-A1RF-11A-32R-A157-07
TCGA-BH-A18J-11A-31R-A12D-07
TCGA-BH-A1EW-11B-33R-A137-07
TCGA-E9-A1N6-11A-32R-A144-07
TCGA-BH-A0BT-11A-21R-A12P-07
TCGA-BH-A1FE-11B-14R-A13Q-07
TCGA-BH-A0BA-11A-22R-A19E-07
TCGA-BH-A0DL-11A-13R-A115-07
TCGA-BH-A0DO-11A-22R-A12D-07
TCGA-BH-A1ET-11B-23R-A137-07
TCGA-E2-A15M-11A-22R-A12D-07
TCGA-E2-A158-11A-22R-A12D-07
TCGA-BH-A18S-11A-43R-A12D-07
TCGA-BH-A0DH-11A-31R-A089-07
TCGA-BH-A0B5-11A-23R-A12P-07
TCGA-BH-A1EU-11A-23R-A137-07
TCGA-E9-A1NA-11A-33R-A144-07
TCGA-E9-A1RD-11A-33R-A157-07
TCGA-A7-A0D9-11A-53R-A089-07
TCGA-E9-A1RB-11A-33R-A157-07
TCGA-E2-A1L7-11A-33R-A144-07
TCGA-BH-A0E1-11A-13R-A089-07
TCGA-BH-A0DZ-11A-22R-A089-07
TCGA-E2-A153-11A-31R-A12D-07
TCGA-BH-A1FM-11B-23R-A13Q-07
TCGA-A7-A0DB-11A-33R-A089-07
TCGA-BH-A0BQ-11A-33R-A115-07
TCGA-E2-A1IG-11A-22R-A144-07
TCGA-BH-A0B3-11B-21R-A089-07
TCGA-BH-A1F0-11B-23R-A137-07
TCGA-GI-A2C8-11A-22R-A16F-07
TCGA-A7-A13E-11A-61R-A12P-07
TCGA-BH-A0DK-11A-13R-A089-07
TCGA-BH-A0B8-11A-41R-A089-07
TCGA-BH-A18V-11A-52R-A12D-07
TCGA-BH-A0C3-11A-23R-A12P-07
TCGA-BH-A203-11A-42R-A169-07
TCGA-BH-A0BS-11A-11R-A12P-07
TCGA-BH-A18M-11A-33R-A12D-07
TCGA-E9-A1RI-11A-41R-A169-07
TCGA-AC-A23H-11A-12R-A157-07
TCGA-E9-A1ND-11A-43R-A144-07
TCGA-BH-A0BZ-11A-61R-A12P-07
TCGA-D8-A27W-01A-11R-A16F-07
TCGA-A8-A07R-01A-21R-A034-07
TCGA-E9-A245-01A-22R-A16F-07
TCGA-AC-A6NO-01A-12R-A33J-07
TCGA-E2-A15G-01A-11R-A12D-07
TCGA-BH-A0H9-01A-11R-A056-07
TCGA-GM-A2DN-01A-11R-A180-07
TCGA-AC-A6IX-01A-12R-A32P-07
TCGA-OL-A66L-01A-12R-A31O-07
TCGA-AR-A256-01A-11R-A169-07
TCGA-BH-A0DE-01A-11R-A115-07
TCGA-A2-A0T1-01A-21R-A084-07
TCGA-BH-A18U-01A-21R-A12D-07
TCGA-AR-A5QM-01A-11R-A27Q-07
TCGA-GM-A2DH-01A-11R-A180-07
TCGA-BH-A0HO-01A-11R-A034-07
TCGA-A2-A0YF-01A-21R-A109-07
TCGA-BH-A18J-01A-11R-A12D-07
TCGA-E2-A14N-01A-31R-A137-07
TCGA-A7-A426-01A-22R-A24H-07
TCGA-AR-A0TZ-01A-12R-A084-07
TCGA-A8-A08F-01A-11R-A00Z-07
TCGA-BH-A1FC-01A-11R-A13Q-07
TCGA-AR-A1AL-01A-21R-A12P-07
TCGA-BH-A0BM-01A-11R-A056-07
TCGA-LD-A74U-01A-13R-A33J-07
TCGA-BH-A0HU-01A-11R-A034-07
TCGA-E9-A243-01A-21R-A169-07
TCGA-A2-A0EQ-01A-11R-A034-07
TCGA-A8-A09R-01A-11R-A00Z-07
TCGA-D8-A1JG-01B-11R-A13Q-07
TCGA-B6-A0WT-01A-11R-A109-07
TCGA-B6-A0IN-01A-11R-A034-07
TCGA-EW-A6SC-01A-12R-A32P-07
TCGA-EW-A6SA-01A-21R-A32P-07
TCGA-AO-A125-01A-11R-A10J-07
TCGA-E9-A1NA-01A-11R-A144-07
TCGA-A8-A08T-01A-21R-A00Z-07
TCGA-BH-A0E7-01A-11R-A034-07
TCGA-LL-A73Z-01A-11R-A32P-07
TCGA-A1-A0SO-01A-22R-A084-07
TCGA-BH-A201-01A-11R-A14M-07
TCGA-BH-A18G-01A-11R-A12D-07
TCGA-D8-A141-01A-11R-A115-07
TCGA-A7-A0CG-01A-12R-A056-07
TCGA-AN-A041-01A-11R-A034-07
TCGA-EW-A1P4-01A-21R-A144-07
TCGA-BH-A0H6-01A-21R-A056-07
TCGA-D8-A1XU-01A-11R-A14M-07
TCGA-A7-A13D-01A-13R-A12P-07
TCGA-A8-A09D-01A-11R-A00Z-07
TCGA-BH-A8FZ-01A-11R-A352-07
TCGA-E9-A3Q9-01A-11R-A21T-07
TCGA-BH-A18R-01A-11R-A12D-07
TCGA-BH-A0HK-01A-11R-A056-07
TCGA-A7-A0D9-01A-31R-A056-07
TCGA-AO-A03L-01A-41R-A056-07
TCGA-E2-A1B1-01A-21R-A12P-07
TCGA-EW-A6SD-01A-12R-A33J-07
TCGA-AC-A2B8-01A-11R-A17B-07
TCGA-C8-A133-01A-32R-A12D-07
TCGA-A7-A2KD-01A-31R-A21T-07
TCGA-AO-A1KO-01A-31R-A13Q-07
TCGA-V7-A7HQ-01A-11R-A33J-07
TCGA-BH-A0E0-01A-11R-A056-07
TCGA-BH-A1F8-01A-11R-A13Q-07
TCGA-AN-A0AK-01A-21R-A00Z-07
TCGA-5L-AAT0-01A-12R-A41B-07
TCGA-E2-A1IK-01A-11R-A144-07
TCGA-EW-A2FR-01A-11R-A21T-07
TCGA-AN-A049-01A-21R-A00Z-07
TCGA-OL-A6VO-01A-12R-A33J-07
TCGA-BH-A0DV-01A-21R-A12P-07
TCGA-OL-A5S0-01A-11R-A28M-07
TCGA-A8-A0AB-01A-11R-A034-07
TCGA-OL-A6VQ-01A-12R-A41B-07
TCGA-B6-A1KF-01A-11R-A13Q-07
TCGA-AO-A12E-01A-11R-A10J-07
TCGA-C8-A26W-01A-11R-A16F-07
TCGA-3C-AALK-01A-11R-A41B-07
TCGA-C8-A12L-01A-11R-A115-07
TCGA-A2-A0YC-01A-11R-A109-07
TCGA-BH-A1EU-01A-11R-A137-07
TCGA-A8-A07Z-01A-11R-A00Z-07
TCGA-A7-A13D-01A-13R-A277-07
TCGA-A2-A0YD-01A-11R-A109-07
TCGA-AO-A0JI-01A-21R-A056-07
TCGA-AO-A12B-01A-11R-A10J-07
TCGA-A2-A0EO-01A-11R-A034-07
TCGA-AC-A23G-01A-11R-A213-07
TCGA-UU-A93S-01A-21R-A41B-07
TCGA-C8-A12U-01A-11R-A115-07
TCGA-BH-A18H-01A-11R-A12D-07
TCGA-C8-A1HM-01A-12R-A137-07
TCGA-HN-A2OB-01A-21R-A27Q-07
TCGA-D8-A1XZ-01A-11R-A14M-07
TCGA-E2-A14Y-01A-21R-A12D-07
TCGA-BH-A18I-01A-11R-A12D-07
TCGA-AR-A252-01A-11R-A169-07
TCGA-A8-A07E-01A-11R-A034-07
TCGA-AN-A0FS-01A-11R-A034-07
TCGA-BH-A1F5-01A-12R-A13Q-07
TCGA-BH-A0B4-01A-11R-A00Z-07
TCGA-AN-A0XN-01A-21R-A109-07
TCGA-A7-A5ZW-01A-12R-A29R-07
TCGA-AC-A5XU-01A-11R-A28M-07
TCGA-EW-A1PG-01A-11R-A144-07
TCGA-AC-A3W7-01A-11R-A22K-07
TCGA-A2-A4RY-01A-31R-A266-07
TCGA-E2-A15A-01A-11R-A12D-07
TCGA-A8-A09B-01A-11R-A00Z-07
TCGA-BH-A0HP-01A-12R-A084-07
TCGA-AQ-A54O-01A-11R-A266-07
TCGA-D8-A1J9-01A-11R-A13Q-07
TCGA-AO-A0JL-01A-11R-A056-07
TCGA-B6-A0X7-01A-11R-A10J-07
TCGA-B6-A2IU-01A-32R-A18M-07
TCGA-B6-A0WS-01A-11R-A115-07
TCGA-E2-A1IO-01A-11R-A144-07
TCGA-AC-A5EH-01A-11R-A28M-07
TCGA-AC-A3BB-01A-21R-A19W-07
TCGA-AR-A0TQ-01A-11R-A084-07
TCGA-D8-A1JK-01A-11R-A13Q-07
TCGA-D8-A1X7-01A-11R-A14M-07
TCGA-AO-A1KQ-01A-11R-A13Q-07
TCGA-PL-A8LX-01A-11R-A41B-07
TCGA-AR-A2LH-01A-31R-A18M-07
TCGA-BH-A0B8-01A-21R-A056-07
TCGA-A2-A3KD-01A-12R-A213-07
TCGA-A2-A0D4-01A-11R-A00Z-07
TCGA-D8-A27R-01A-11R-A16F-07
TCGA-E2-A1IE-01A-11R-A13Q-07
TCGA-EW-A1J3-01A-11R-A13Q-07
TCGA-BH-A18Q-01A-12R-A12D-07
TCGA-B6-A1KI-01A-11R-A14M-07
TCGA-A7-A26G-01A-21R-A169-07
TCGA-AO-A03M-01B-11R-A10J-07
TCGA-A2-A0CS-01A-11R-A115-07
TCGA-C8-A12W-01A-11R-A115-07
TCGA-E2-A1IU-01A-11R-A14D-07
TCGA-B6-A0I9-01A-11R-A034-07
TCGA-AO-A128-01A-11R-A10J-07
TCGA-A7-A3J0-01A-11R-A213-07
TCGA-E9-A1NE-01A-21R-A14M-07
TCGA-AC-A2FB-01A-11R-A17B-07
TCGA-AR-A5QP-01A-11R-A28M-07
TCGA-A2-A0T4-01A-31R-A084-07
TCGA-BH-A0BL-01A-11R-A115-07
TCGA-BH-A0HY-01A-11R-A056-07
TCGA-E9-A2JT-01A-22R-A18M-07
TCGA-A7-A3IY-01A-21R-A21T-07
TCGA-A8-A085-01A-11R-A00Z-07
TCGA-D8-A146-01A-31R-A115-07
TCGA-D8-A1X5-01A-11R-A14D-07
TCGA-A2-A1FV-01A-11R-A13Q-07
TCGA-A2-A0CK-01A-11R-A22K-07
TCGA-E2-A1IL-01A-11R-A14D-07
TCGA-EW-A1J5-01A-11R-A13Q-07
TCGA-A8-A07U-01A-11R-A034-07
TCGA-BH-A0DL-01A-11R-A115-07
TCGA-GM-A2DF-01A-11R-A180-07
TCGA-C8-A131-01A-11R-A115-07
TCGA-B6-A409-01A-11R-A24H-07
TCGA-A2-A0SY-01A-31R-A084-07
TCGA-AO-A12A-01A-21R-A115-07
TCGA-A2-A0CY-01A-12R-A034-07
TCGA-AN-A0G0-01A-11R-A034-07
TCGA-A2-A3XT-01A-11R-A22U-07
TCGA-AQ-A1H2-01A-11R-A13Q-07
TCGA-E2-A1L8-01A-11R-A13Q-07
TCGA-C8-A26V-01A-11R-A16F-07
TCGA-GM-A4E0-01A-12R-A266-07
TCGA-BH-A208-01A-11R-A157-07
TCGA-D8-A1XD-01A-11R-A14D-07
TCGA-AO-A0J8-01A-21R-A034-07
TCGA-AO-A1KS-01A-11R-A13Q-07
TCGA-OL-A66J-01A-11R-A29R-07
TCGA-A7-A0CD-01A-11R-A00Z-07
TCGA-EW-A2FS-01A-11R-A17B-07
TCGA-D8-A1JT-01A-31R-A13Q-07
TCGA-D8-A1JS-01A-11R-A13Q-07
TCGA-BH-A0DT-01A-21R-A12D-07
TCGA-B6-A0IE-01A-11R-A034-07
TCGA-BH-A0BT-01A-11R-A12P-07
TCGA-AR-A1AH-01A-11R-A12D-07
TCGA-A2-A0EU-01A-22R-A056-07
TCGA-D8-A1X8-01A-11R-A14M-07
TCGA-AC-A3EH-01A-22R-A22K-07
TCGA-AN-A0FW-01A-11R-A034-07
TCGA-D8-A1XL-01A-11R-A14M-07
TCGA-BH-A0WA-01A-11R-A109-07
TCGA-A8-A094-01A-11R-A00Z-07
TCGA-B6-A0I5-01A-11R-A034-07
TCGA-C8-A12Z-01A-11R-A115-07
TCGA-E2-A1LL-01A-11R-A144-07
TCGA-A2-A0EV-01A-11R-A034-07
TCGA-AC-A62V-01A-11R-A31O-07
TCGA-OK-A5Q2-01A-11R-A27Q-07
TCGA-BH-A42T-01A-11R-A24H-07
TCGA-E2-A154-01A-11R-A115-07
TCGA-C8-A1HG-01A-11R-A137-07
TCGA-A8-A06X-01A-21R-A00Z-07
TCGA-B6-A0WZ-01A-11R-A109-07
TCGA-AC-A23H-01A-11R-A157-07
TCGA-E2-A1B6-01A-31R-A12P-07
TCGA-A8-A093-01A-11R-A00Z-07
TCGA-AR-A1AM-01A-41R-A22K-07
TCGA-AO-A0J9-01A-11R-A034-07
TCGA-BH-A6R9-01A-21R-A32P-07
TCGA-D8-A1XC-01A-11R-A14D-07
TCGA-BH-A0BZ-01A-31R-A12P-07
TCGA-BH-A0E6-01A-11R-A034-07
TCGA-A2-A0ER-01A-21R-A034-07
TCGA-A2-A0T5-01A-21R-A084-07
TCGA-E2-A1LH-01A-11R-A14D-07
TCGA-BH-A1EO-01A-11R-A137-07
TCGA-B6-A0X1-01A-11R-A109-07
TCGA-BH-A0BO-01A-23R-A12D-07
TCGA-A8-A06U-01A-11R-A00Z-07
TCGA-AN-A0XO-01A-11R-A109-07
TCGA-AN-A0FV-01A-11R-A00Z-07
TCGA-AR-A1AO-01A-11R-A12P-07
TCGA-E2-A15F-01A-11R-A115-07
TCGA-D8-A27H-01A-11R-A16F-07
TCGA-LL-A9Q3-01A-11R-A41B-07
TCGA-E2-A15I-01A-21R-A137-07
TCGA-AC-A2BM-01A-11R-A21T-07
TCGA-A2-A0CT-01A-31R-A056-07
TCGA-A7-A13E-01A-11R-A12P-07
TCGA-GM-A3NY-01A-11R-A21T-07
TCGA-D8-A1J8-01A-11R-A13Q-07
TCGA-D8-A27G-01A-11R-A16F-07
TCGA-B6-A0I6-01A-11R-A034-07
TCGA-AO-A12D-01A-11R-A115-07
TCGA-EW-A6SB-01A-12R-A32P-07
TCGA-E9-A249-01A-11R-A169-07
TCGA-EW-A1PE-01A-11R-A144-07
TCGA-A8-A07W-01A-11R-A00Z-07
TCGA-GM-A3NW-01A-21R-A22K-07
TCGA-E9-A1NC-01A-21R-A26B-07
TCGA-AO-A0JM-01A-21R-A056-07
TCGA-B6-A0IQ-01A-11R-A034-07
TCGA-E9-A228-01A-31R-A157-07
TCGA-A8-A09Z-01A-11R-A00Z-07
TCGA-E2-A105-01A-11R-A10J-07
TCGA-S3-AA0Z-01A-11R-A41B-07
TCGA-OL-A5D6-01A-21R-A27Q-07
TCGA-BH-A0RX-01A-21R-A084-07
TCGA-B6-A0RP-01A-21R-A084-07
TCGA-AR-A1AQ-01A-11R-A12P-07
TCGA-A2-A25A-01A-12R-A16F-07
TCGA-E2-A10E-01A-21R-A10J-07
TCGA-C8-A3M7-01A-12R-A21T-07
TCGA-AQ-A1H3-01A-31R-A13Q-07
TCGA-E9-A247-01A-11R-A169-07
TCGA-AN-A0FF-01A-11R-A034-07
TCGA-A2-A0YH-01A-11R-A109-07
TCGA-E9-A1RH-01A-21R-A169-07
TCGA-AR-A2LE-01A-11R-A180-07
TCGA-E9-A1N3-01A-12R-A157-07
TCGA-MS-A51U-01A-31R-A266-07
TCGA-A8-A07F-01A-11R-A00Z-07
TCGA-A8-A08A-01A-11R-A32Y-07
TCGA-D8-A1JE-01A-11R-A13Q-07
TCGA-LL-A6FR-01A-12R-A31O-07
TCGA-E9-A22D-01A-11R-A157-07
TCGA-A2-A0SX-01A-12R-A084-07
TCGA-EW-A1PH-01A-11R-A14M-07
TCGA-AN-A0FK-01A-11R-A034-07
TCGA-A2-A0CX-01A-21R-A00Z-07
TCGA-E2-A158-01A-11R-A12D-07
TCGA-D8-A1X6-01A-11R-A14M-07
TCGA-EW-A1P7-01A-21R-A144-07
TCGA-B6-A0IG-01A-11R-A034-07
TCGA-A7-A4SA-01A-11R-A266-07
TCGA-D8-A1JP-01A-11R-A13Q-07
TCGA-C8-A1HN-01A-11R-A137-07
TCGA-D8-A1XK-01A-21R-A14M-07
TCGA-E9-A22A-01A-11R-A157-07
TCGA-AO-A12H-01A-11R-A115-07
TCGA-D8-A1Y2-01A-11R-A157-07
TCGA-D8-A1XW-01A-11R-A14M-07
TCGA-OL-A5RZ-01A-11R-A28M-07
TCGA-BH-A42V-01A-11R-A24H-07
TCGA-BH-A0B7-01A-12R-A115-07
TCGA-C8-A1HO-01A-11R-A13Q-07
TCGA-A8-A09A-01A-11R-A00Z-07
TCGA-AO-A129-01A-21R-A10J-07
TCGA-AO-A03O-01A-11R-A00Z-07
TCGA-E2-A10A-01A-21R-A115-07
TCGA-A8-A09E-01A-11R-A00Z-07
TCGA-AC-A3YJ-01A-11R-A22U-07
TCGA-EW-A1IX-01A-12R-A144-07
TCGA-A8-A09N-01A-11R-A00Z-07
TCGA-AO-A0J6-01A-11R-A034-07
TCGA-AN-A0FJ-01A-11R-A00Z-07
TCGA-BH-A1ES-01A-11R-A137-07
TCGA-BH-A0E1-01A-11R-A056-07
TCGA-4H-AAAK-01A-12R-A41B-07
TCGA-EW-A6S9-01A-22R-A33J-07
TCGA-D8-A1JM-01A-11R-A13Q-07
TCGA-A7-A4SF-01A-11R-A266-07
TCGA-A8-A08R-01A-11R-A034-07
TCGA-A7-A26F-01B-04R-A22O-07
TCGA-A2-A4RW-01A-21R-A266-07
TCGA-E2-A14O-01A-31R-A115-07
TCGA-AN-A0FL-01A-11R-A034-07
TCGA-AO-A03V-01A-11R-A115-07
TCGA-E2-A106-01A-11R-A10J-07
TCGA-AO-A0J2-01A-11R-A034-07
TCGA-AO-A1KR-01A-12R-A144-07
TCGA-BH-A0HN-01A-11R-A10U-07
TCGA-E2-A3DX-01A-21R-A213-07
TCGA-E2-A10B-01A-11R-A10J-07
TCGA-A7-A0CJ-01A-21R-A00Z-07
TCGA-A8-A06O-01A-11R-A00Z-07
TCGA-BH-A18N-01A-11R-A12D-07
TCGA-D8-A73X-01A-11R-A32P-07
TCGA-EW-A3U0-01A-11R-A22K-07
TCGA-AN-A0FY-01A-11R-A034-07
TCGA-C8-A12O-01A-11R-A115-07
TCGA-EW-A1OV-01A-11R-A144-07
TCGA-A8-A08P-01A-11R-A00Z-07
TCGA-C8-A26Z-01A-11R-A16F-07
TCGA-E2-A1LG-01A-21R-A14M-07
TCGA-AR-A0TY-01A-12R-A115-07
TCGA-AQ-A54N-01A-11R-A266-07
TCGA-A7-A26E-01A-11R-A277-07
TCGA-BH-A1FR-01A-11R-A13Q-07
TCGA-A2-A0D2-01A-21R-A034-07
TCGA-C8-A12P-01A-11R-A115-07
TCGA-BH-A1F0-01A-11R-A137-07
TCGA-OL-A66K-01A-11R-A29R-07
TCGA-BH-A0GY-01A-11R-A056-07
TCGA-GM-A2DD-01A-11R-A180-07
TCGA-A1-A0SE-01A-11R-A084-07
TCGA-LL-A73Y-01A-11R-A33J-07
TCGA-A2-A0CM-01A-31R-A034-07
TCGA-A8-A09G-01A-21R-A00Z-07
TCGA-E2-A14T-01A-11R-A115-07
TCGA-E9-A1N8-01A-11R-A144-07
TCGA-AN-A0AT-01A-11R-A034-07
TCGA-A8-A08Z-01A-21R-A00Z-07
TCGA-AR-A24N-01A-11R-A169-07
TCGA-BH-A0B6-01A-11R-A19W-07
TCGA-EW-A1PA-01A-11R-A144-07
TCGA-AR-A24Q-01A-12R-A169-07
TCGA-BH-A8FY-01A-11R-A36F-07
TCGA-E9-A2JS-01A-11R-A180-07
TCGA-AN-A0AR-01A-11R-A00Z-07
TCGA-A2-A04U-01A-11R-A115-07
TCGA-A7-A56D-01A-11R-A27Q-07
TCGA-B6-A0X4-01A-11R-A109-07
TCGA-AQ-A7U7-01A-22R-A352-07
TCGA-D8-A1XT-01A-11R-A14M-07
TCGA-BH-A1FJ-01A-11R-A13Q-07
TCGA-A2-A0ET-01A-31R-A034-07
TCGA-AR-A0TR-01A-11R-A084-07
TCGA-A8-A095-01A-11R-A00Z-07
TCGA-A2-A25E-01A-11R-A169-07
TCGA-A8-A08S-01A-11R-A034-07
TCGA-AR-A0TS-01A-11R-A115-07
TCGA-BH-A0BR-01A-21R-A115-07
TCGA-A8-A0A6-01A-12R-A056-07
TCGA-B6-A401-01A-11R-A239-07
TCGA-E2-A1B5-01A-21R-A12P-07
TCGA-A7-A26I-01B-06R-A22O-07
TCGA-AN-A03Y-01A-21R-A00Z-07
TCGA-E2-A1AZ-01A-11R-A12P-07
TCGA-GM-A2DA-01A-11R-A18M-07
TCGA-A2-A0T6-01A-11R-A084-07
TCGA-BH-A0HI-01A-11R-A084-07
TCGA-A2-A3XW-01A-11R-A239-07
TCGA-E9-A22E-01A-11R-A157-07
TCGA-A2-A04W-01A-31R-A115-07
TCGA-D8-A3Z5-01A-41R-A24H-07
TCGA-B6-A400-01A-11R-A239-07
TCGA-A1-A0SH-01A-11R-A084-07
TCGA-A8-A0AD-01A-11R-A056-07
TCGA-AQ-A04H-01B-11R-A10J-07
TCGA-AN-A04C-01A-21R-A034-07
TCGA-AN-A03X-01A-21R-A00Z-07
TCGA-A2-A3XZ-01A-42R-A239-07
TCGA-AC-A8OQ-01A-11R-A41B-07
TCGA-BH-A1EV-01A-11R-A137-07
TCGA-B6-A0IB-01A-11R-A034-07
TCGA-AR-A1AX-01A-11R-A12P-07
TCGA-BH-A1FB-01A-11R-A13Q-07
TCGA-E2-A574-01A-11R-A29R-07
TCGA-A8-A07I-01A-11R-A00Z-07
TCGA-EW-A423-01A-11R-A24H-07
TCGA-A2-A3XY-01A-11R-A239-07
TCGA-AC-A7VC-01A-11R-A352-07
TCGA-E2-A2P6-01A-11R-A19W-07
TCGA-A2-A04Y-01A-21R-A034-07
TCGA-BH-A0E9-01B-11R-A115-07
TCGA-AC-A2BK-01A-11R-A21T-07
TCGA-B6-A0RV-01A-11R-A084-07
TCGA-C8-A27B-01A-11R-A169-07
TCGA-E9-A1R3-01A-31R-A14M-07
TCGA-D8-A1XY-01A-11R-A14M-07
TCGA-BH-A1FM-01A-11R-A13Q-07
TCGA-E2-A10F-01A-11R-A10J-07
TCGA-BH-A1EN-01A-11R-A13Q-07
TCGA-A1-A0SN-01A-11R-A144-07
TCGA-E2-A150-01A-11R-A12D-07
TCGA-PL-A8LZ-01A-31R-A36F-07
TCGA-A2-A0CO-01A-13R-A22K-07
TCGA-HN-A2NL-01A-11R-A18M-07
TCGA-E2-A14X-01A-11R-A115-07
TCGA-BH-A0B2-01A-11R-A10J-07
TCGA-A2-A4RX-01A-11R-A266-07
TCGA-E2-A572-01A-13R-A31O-07
TCGA-C8-A12V-01A-11R-A115-07
TCGA-BH-A0BQ-01A-21R-A115-07
TCGA-C8-A12T-01A-11R-A115-07
TCGA-EW-A1OX-01A-11R-A144-07
TCGA-BH-A0BW-01A-11R-A115-07
TCGA-A8-A084-01A-21R-A00Z-07
TCGA-A2-A0SV-01A-11R-A084-07
TCGA-C8-A275-01A-21R-A16F-07
TCGA-S3-A6ZH-01A-22R-A32P-07
TCGA-D8-A1JD-01A-11R-A13Q-07
TCGA-A2-A0CV-01A-31R-A115-07
TCGA-E2-A14V-01A-11R-A12D-07
TCGA-E2-A153-01A-12R-A12D-07
TCGA-AR-A24R-01A-11R-A169-07
TCGA-AR-A1AV-01A-21R-A12P-07
TCGA-OL-A66H-01A-11R-A29R-07
TCGA-AR-A251-01A-12R-A169-07
TCGA-AC-A7VB-01A-11R-A352-07
TCGA-A8-A08C-01A-11R-A00Z-07
TCGA-OL-A5RV-01A-12R-A28M-07
TCGA-D8-A27P-01A-11R-A16F-07
TCGA-GM-A3XN-01A-12R-A22U-07
TCGA-A8-A0A9-01A-11R-A00Z-07
TCGA-C8-A8HQ-01A-11R-A36F-07
TCGA-GI-A2C8-01A-11R-A16F-07
TCGA-B6-A408-01A-12R-A24H-07
TCGA-AR-A24X-01A-11R-A169-07
TCGA-D8-A13Y-01A-11R-A115-07
TCGA-D8-A1XA-01A-11R-A14D-07
TCGA-D8-A27E-01A-11R-A16F-07
TCGA-D8-A1XV-01A-11R-A14M-07
TCGA-A2-A25F-01A-11R-A169-07
TCGA-S3-A6ZF-01A-32R-A32P-07
TCGA-C8-A26X-01A-31R-A16F-07
TCGA-C8-A27A-01A-11R-A169-07
TCGA-BH-A1EX-01A-11R-A13Q-07
TCGA-A7-A0DB-01A-11R-A277-07
TCGA-BH-A0W5-01A-11R-A109-07
TCGA-AR-A24M-01A-11R-A169-07
TCGA-JL-A3YX-01A-11R-A22U-07
TCGA-A8-A0A4-01A-11R-A00Z-07
TCGA-E9-A3HO-01A-11R-A213-07
TCGA-EW-A2FV-01A-11R-A17B-07
TCGA-BH-A0EA-01A-11R-A115-07
TCGA-AO-A0JB-01A-11R-A32Y-07
TCGA-A8-A06P-01A-11R-A00Z-07
TCGA-E9-A1NG-01A-21R-A14M-07
TCGA-BH-A18T-01A-11R-A12D-07
TCGA-E2-A15R-01A-11R-A115-07
TCGA-AO-A0JJ-01A-11R-A056-07
TCGA-E2-A15L-01A-11R-A12D-07
TCGA-AR-A1AJ-01A-21R-A12P-07
TCGA-BH-A0BA-01A-11R-A056-07
TCGA-AN-A04D-01A-21R-A034-07
TCGA-BH-A0AU-01A-11R-A12P-07
TCGA-A2-A25D-01A-12R-A16F-07
TCGA-AO-A126-01A-11R-A10J-07
TCGA-A8-A09Q-01A-11R-A00Z-07
TCGA-EW-A1J1-01A-11R-A13Q-07
TCGA-E2-A15D-01A-11R-A115-07
TCGA-LL-A5YO-01A-21R-A28M-07
TCGA-LL-A5YL-01A-12R-A29R-07
TCGA-A8-A08X-01A-21R-A00Z-07
TCGA-S3-AA17-01A-11R-A41B-07
TCGA-AN-A0XT-01A-11R-A109-07
TCGA-AO-A0J4-01A-11R-A034-07
TCGA-A8-A08O-01A-21R-A056-07
TCGA-BH-A0BF-01A-21R-A12P-07
TCGA-C8-A12X-01A-11R-A115-07
TCGA-E2-A1IG-01A-11R-A144-07
TCGA-D8-A1JH-01A-11R-A13Q-07
TCGA-BH-A0HL-01A-11R-A10U-07
TCGA-GM-A5PX-01A-12R-A28M-07
TCGA-AR-A1AK-01A-21R-A12P-07
TCGA-A2-A3XU-01A-12R-A22U-07
TCGA-AC-A2QH-01B-04R-A22O-07
TCGA-A8-A07S-01A-11R-A034-07
TCGA-E2-A15P-01A-11R-A115-07
TCGA-A2-A0CR-01A-11R-A22K-07
TCGA-A2-A1G0-01A-11R-A13Q-07
TCGA-BH-A0DQ-01A-11R-A084-07
TCGA-UL-AAZ6-01A-11R-A41B-07
TCGA-AR-A24P-01A-11R-A169-07
TCGA-BH-A0AY-01A-21R-A00Z-07
TCGA-LD-A66U-01A-11R-A31O-07
TCGA-E2-A1BC-01A-11R-A12P-07
TCGA-AN-A0XW-01A-11R-A109-07
TCGA-AR-A24V-01A-21R-A169-07
TCGA-S3-AA12-01A-11R-A41B-07
TCGA-E9-A1N6-01A-11R-A144-07
TCGA-A8-A086-01A-11R-A00Z-07
TCGA-A2-A0YJ-01A-11R-A109-07
TCGA-A2-A0SW-01A-11R-A084-07
TCGA-AR-A1AI-01A-11R-A12P-07
TCGA-BH-AB28-01A-31R-A41B-07
TCGA-E2-A1LA-01A-11R-A144-07
TCGA-A8-A09V-01A-11R-A034-07
TCGA-WT-AB44-01A-11R-A41B-07
TCGA-E9-A1R5-01A-11R-A14M-07
TCGA-A2-A25B-01A-11R-A169-07
TCGA-AR-A2LR-01A-12R-A18M-07
TCGA-B6-A1KN-01A-11R-A13Q-07
TCGA-A7-A6VY-01A-12R-A33J-07
TCGA-C8-A1HL-01A-11R-A137-07
TCGA-B6-A0WV-01A-11R-A109-07
TCGA-E2-A159-01A-11R-A115-07
TCGA-AR-A1AT-01A-11R-A12P-07
TCGA-BH-A6R8-01A-21R-A33J-07
TCGA-D8-A1Y1-01A-21R-A14M-07
TCGA-BH-A0EE-01A-11R-A034-07
TCGA-AC-A3OD-01B-06R-A22O-07
TCGA-BH-A0HB-01A-11R-A056-07
TCGA-A2-A1FW-01A-11R-A13Q-07
TCGA-E2-A14Z-01A-11R-A115-07
TCGA-EW-A1PF-01A-11R-A144-07
TCGA-BH-A1FU-01A-11R-A14D-07
TCGA-A8-A07C-01A-11R-A034-07
TCGA-E9-A5UO-01A-11R-A28M-07
TCGA-S3-AA11-01A-31R-A41B-07
TCGA-BH-A0C0-01A-21R-A056-07
TCGA-E2-A14R-01A-11R-A115-07
TCGA-AC-A62Y-01A-11R-A29R-07
TCGA-A8-A08B-01A-11R-A00Z-07
TCGA-D8-A1XJ-01A-11R-A14M-07
TCGA-AO-A0JC-01A-11R-A056-07
TCGA-AR-A0U0-01A-11R-A109-07
TCGA-A7-A6VV-01A-22R-A33J-07
TCGA-B6-A3ZX-01A-11R-A239-07
TCGA-AR-A24L-01A-11R-A169-07
TCGA-EW-A1OW-01A-21R-A144-07
TCGA-EW-A1P3-01A-11R-A144-07
TCGA-LL-A7T0-01A-31R-A352-07
TCGA-B6-A0I8-01A-11R-A034-07
TCGA-BH-A0AV-01A-31R-A115-07
TCGA-E2-A156-01A-11R-A12D-07
TCGA-BH-A5IZ-01A-11R-A27Q-07
TCGA-AR-A24W-01A-11R-A169-07
TCGA-D8-A1JU-01A-11R-A13Q-07
TCGA-E2-A1BD-01A-11R-A12P-07
TCGA-C8-A12Q-01A-11R-A115-07
TCGA-BH-A18F-01A-11R-A12D-07
TCGA-A2-A0D1-01A-11R-A034-07
TCGA-BH-A1FD-01A-11R-A13Q-07
TCGA-A2-A0YM-01A-11R-A109-07
TCGA-E9-A5UP-01A-11R-A28M-07
TCGA-C8-A1HF-01A-11R-A137-07
TCGA-EW-A1P1-01A-31R-A14D-07
TCGA-A7-A4SB-01A-21R-A266-07
TCGA-BH-A0E2-01A-11R-A056-07
TCGA-AR-A0TU-01A-31R-A109-07
TCGA-E9-A295-01A-11R-A16F-07
TCGA-LD-A7W6-01A-81R-A352-07
TCGA-E2-A1LK-01A-21R-A14D-07
TCGA-AO-A0J7-01A-11R-A034-07
TCGA-AO-A03U-01B-21R-A10J-07
TCGA-E9-A1RB-01A-11R-A157-07
TCGA-E9-A22B-01A-11R-A157-07
TCGA-A8-A07P-01A-11R-A00Z-07
TCGA-A8-A06Z-01A-11R-A00Z-07
TCGA-LL-A740-01A-21R-A32P-07
TCGA-A7-A0CE-01A-11R-A00Z-07
TCGA-A8-A08L-01A-11R-A00Z-07
TCGA-A8-A06Q-01A-11R-A034-07
TCGA-B6-A0IK-01A-12R-A056-07
TCGA-BH-A1EW-01A-11R-A137-07
TCGA-A8-A090-01A-11R-A00Z-07
TCGA-BH-A28Q-01A-11R-A16F-07
TCGA-A8-A07L-01A-11R-A00Z-07
TCGA-BH-A0AZ-01A-21R-A12P-07
TCGA-A8-A076-01A-21R-A00Z-07
TCGA-D8-A1JI-01A-11R-A13Q-07
TCGA-GM-A2DC-01A-11R-A18M-07
TCGA-A8-A09T-01A-11R-A00Z-07
TCGA-AC-A5XS-01A-11R-A29R-07
TCGA-AC-A4ZE-01A-11R-A41B-07
TCGA-D8-A27I-01A-11R-A16F-07
TCGA-A8-A09X-01A-11R-A00Z-07
TCGA-OL-A6VR-01A-32R-A33J-07
TCGA-A2-A0D3-01A-11R-A115-07
TCGA-S3-AA14-01A-11R-A41B-07
TCGA-B6-A40C-01A-11R-A239-07
TCGA-E9-A1RD-01A-11R-A157-07
TCGA-PL-A8LV-01A-21R-A41B-07
TCGA-A7-A6VX-01A-12R-A33J-07
TCGA-C8-A8HR-01A-11R-A36F-07
TCGA-E2-A1LS-01A-12R-A157-07
TCGA-A1-A0SI-01A-11R-A144-07
TCGA-A2-A1FZ-01A-51R-A14D-07
TCGA-C8-A134-01A-11R-A115-07
TCGA-E2-A1LE-01A-12R-A19W-07
TCGA-5L-AAT1-01A-12R-A41B-07
TCGA-D8-A1JL-01A-11R-A13Q-07
TCGA-AC-A2QI-01A-12R-A19W-07
TCGA-GM-A3XL-01A-11R-A22U-07
TCGA-LQ-A4E4-01A-11R-A266-07
TCGA-A7-A0DC-01A-11R-A00Z-07
TCGA-OL-A97C-01A-32R-A41B-07
TCGA-BH-A0DX-01A-11R-A115-07
TCGA-A2-A259-01A-11R-A16F-07
TCGA-AO-A03P-01A-11R-A00Z-07
TCGA-A7-A4SE-01A-11R-A266-07
TCGA-C8-A132-01A-31R-A115-07
TCGA-B6-A0RS-01A-11R-A084-07
TCGA-BH-A0BV-01A-11R-A00Z-07
TCGA-BH-A0B1-01A-12R-A056-07
TCGA-AN-A0FZ-01A-11R-A034-07
TCGA-EW-A1PC-01B-11R-A21T-07
TCGA-D8-A147-01A-11R-A115-07
TCGA-BH-A1FE-01A-11R-A13Q-07
TCGA-AN-A0XV-01A-11R-A109-07
TCGA-XX-A89A-01A-11R-A36F-07
TCGA-LL-A441-01A-11R-A24H-07
TCGA-E2-A15O-01A-11R-A115-07
TCGA-A2-A0EN-01A-13R-A084-07
TCGA-EW-A1J6-01A-11R-A13Q-07
TCGA-BH-A204-01A-11R-A157-07
TCGA-OL-A5RW-01A-11R-A28M-07
TCGA-EW-A1OY-01A-11R-A144-07
TCGA-AC-A8OS-01A-12R-A41B-07
TCGA-LL-A5YP-01A-21R-A28M-07
TCGA-A2-A0YK-01A-22R-A109-07
TCGA-GM-A2DL-01A-11R-A18M-07
TCGA-AO-A0JF-01A-11R-A056-07
TCGA-BH-A0HQ-01A-11R-A034-07
TCGA-AR-A254-01A-21R-A169-07
TCGA-B6-A0I2-01A-11R-A034-07
TCGA-AR-A24H-01A-11R-A169-07
TCGA-B6-A0IC-01A-11R-A034-07
TCGA-D8-A1Y3-01A-11R-A157-07
TCGA-AR-A2LQ-01A-22R-A18M-07
TCGA-E9-A248-01A-11R-A169-07
TCGA-A8-A083-01A-21R-A00Z-07
TCGA-B6-A0RI-01A-11R-A056-07
TCGA-AN-A0XP-01A-11R-A109-07
TCGA-GM-A2DB-01A-31R-A18M-07
TCGA-EW-A1IZ-01A-11R-A13Q-07
TCGA-A2-A04V-01A-21R-A034-07
TCGA-E2-A1II-01A-11R-A144-07
TCGA-BH-A0C7-01B-11R-A115-07
TCGA-PE-A5DE-01A-11R-A27Q-07
TCGA-BH-A1F6-01A-11R-A13Q-07
TCGA-D8-A1JJ-01A-31R-A14M-07
TCGA-E9-A1NI-01A-11R-A14D-07
TCGA-WT-AB41-01A-11R-A41B-07
TCGA-AC-A2FK-01A-12R-A180-07
TCGA-LL-A442-01A-11R-A24H-07
TCGA-GM-A2DI-01A-31R-A18M-07
TCGA-BH-A0C3-01A-21R-A12P-07
TCGA-B6-A0RH-01A-21R-A115-07
TCGA-A7-A26H-01A-11R-A169-07
TCGA-A2-A0EY-01A-11R-A034-07
TCGA-A2-A0EX-01A-21R-A034-07
TCGA-AR-A1AY-01A-21R-A12P-07
TCGA-D8-A1JC-01A-11R-A13Q-07
TCGA-JL-A3YW-01A-12R-A239-07
TCGA-A8-A07O-01A-11R-A00Z-07
TCGA-BH-A0B3-01A-11R-A056-07
TCGA-E9-A1N9-01A-11R-A14D-07
TCGA-A8-A06Y-01A-21R-A00Z-07
TCGA-A8-A09I-01A-22R-A034-07
TCGA-A8-A0A2-01A-11R-A034-07
TCGA-AC-A2FE-01A-11R-A19W-07
TCGA-A7-A13D-01B-04R-A277-07
TCGA-A8-A08J-01A-11R-A00Z-07
TCGA-5T-A9QA-01A-11R-A41B-07
TCGA-A1-A0SQ-01A-21R-A144-07
TCGA-AC-A3QP-01A-11R-A22U-07
TCGA-D8-A1JB-01A-11R-A13Q-07
TCGA-BH-A18S-01A-11R-A12D-07
TCGA-A2-A0CW-01A-21R-A115-07
TCGA-A8-A09K-01A-11R-A00Z-07
TCGA-E9-A22G-01A-11R-A157-07
TCGA-E2-A573-01A-11R-A29R-07
TCGA-AR-A0TP-01A-11R-A084-07
TCGA-AO-A1KT-01A-11R-A13Q-07
TCGA-BH-A203-01A-12R-A169-07
TCGA-B6-A0RM-01A-11R-A084-07
TCGA-A1-A0SP-01A-11R-A084-07
TCGA-A1-A0SB-01A-11R-A144-07
TCGA-AC-A6IV-01A-12R-A33J-07
TCGA-OL-A5RY-01A-21R-A28M-07
TCGA-LL-A7SZ-01A-32R-A352-07
TCGA-AO-A03R-01A-21R-A034-07
TCGA-EW-A1PD-01A-11R-A144-07
TCGA-BH-A1FG-01A-11R-A13Q-07
TCGA-AO-A0JA-01A-11R-A056-07
TCGA-A2-A04T-01A-21R-A034-07
TCGA-BH-A0DH-01A-11R-A084-07
TCGA-A7-A26E-01A-11R-A169-07
TCGA-D8-A1XF-01A-11R-A14D-07
TCGA-A8-A06T-01A-11R-A00Z-07
TCGA-LL-A50Y-01A-11R-A266-07
TCGA-E9-A3QA-01A-61R-A22K-07
TCGA-EW-A2FW-01A-11R-A17B-07
TCGA-AR-A2LN-01A-21R-A18M-07
TCGA-A2-A4S3-01A-21R-A266-07
TCGA-Z7-A8R5-01A-42R-A41B-07
TCGA-A7-A0DB-01C-02R-A277-07
TCGA-A2-A0YI-01A-31R-A10J-07
TCGA-AO-A12C-01A-11R-A10J-07
TCGA-E2-A1IN-01A-11R-A13Q-07
TCGA-AR-A1AR-01A-31R-A137-07
TCGA-E2-A14P-01A-31R-A12D-07
TCGA-EW-A1P5-01A-11R-A144-07
TCGA-E9-A3X8-01A-31R-A22U-07
TCGA-AC-A3QQ-01B-06R-A22O-07
TCGA-A2-A0SU-01A-11R-A084-07
TCGA-E9-A1R2-01A-11R-A14D-07
TCGA-BH-A42U-01A-12R-A24H-07
TCGA-E9-A54Y-01A-11R-A466-07
TCGA-XX-A899-01A-11R-A36F-07
TCGA-A2-A0CU-01A-12R-A034-07
TCGA-E2-A14U-01A-11R-A22K-07
TCGA-BH-A0GZ-01A-11R-A056-07
TCGA-E9-A1NH-01A-11R-A14D-07
TCGA-A8-A079-01A-21R-A00Z-07
TCGA-B6-A0IO-01A-11R-A034-07
TCGA-BH-A0DG-01A-21R-A12P-07
TCGA-A2-A04Q-01A-21R-A034-07
TCGA-D8-A140-01A-11R-A115-07
TCGA-BH-A0BP-01A-11R-A115-07
TCGA-D8-A1XR-01A-11R-A14M-07
TCGA-AR-A0TX-01A-11R-A084-07
TCGA-A1-A0SG-01A-11R-A144-07
TCGA-AO-A12F-01A-11R-A115-07
TCGA-E2-A152-01A-11R-A12D-07
TCGA-EW-A1P6-01A-11R-A144-07
TCGA-E2-A1LI-01A-12R-A157-07
TCGA-AN-A0FX-01A-11R-A034-07
TCGA-AO-A1KP-01A-11R-A13Q-07
TCGA-E9-A1N4-01A-11R-A14M-07
TCGA-B6-A402-01A-11R-A239-07
TCGA-BH-A0B5-01A-11R-A12P-07
TCGA-EW-A1J2-01A-21R-A13Q-07
TCGA-E9-A244-01A-11R-A169-07
TCGA-GM-A2DO-01A-11R-A18M-07
TCGA-C8-A12N-01A-11R-A115-07
TCGA-AN-A0FT-01A-11R-A034-07
TCGA-A8-A09W-01A-11R-A00Z-07
TCGA-A8-A07B-01A-11R-A00Z-07
TCGA-BH-A18M-01A-11R-A12D-07
TCGA-A2-A04P-01A-31R-A034-07
TCGA-D8-A1XB-01A-11R-A14D-07
TCGA-B6-A0X5-01A-21R-A109-07
TCGA-AQ-A04J-01A-02R-A034-07
TCGA-Z7-A8R6-01A-11R-A41B-07
TCGA-AC-A3W6-01A-12R-A22K-07
TCGA-E9-A1N5-01A-11R-A14D-07
TCGA-B6-A0IM-01A-11R-A034-07
TCGA-C8-A273-01A-11R-A16F-07
TCGA-A2-A4S1-01A-21R-A266-07
TCGA-A2-A4S2-01A-12R-A266-07
TCGA-OL-A5D8-01A-11R-A27Q-07
TCGA-A7-A26E-01B-06R-A277-07
TCGA-D8-A27T-01A-11R-A16F-07
TCGA-E2-A15S-01A-11R-A115-07
TCGA-B6-A1KC-01B-11R-A157-07
TCGA-GI-A2C9-01A-11R-A21T-07
TCGA-BH-A0BG-01A-11R-A115-07
TCGA-A7-A6VW-01A-21R-A33J-07
TCGA-AQ-A04L-01B-21R-A10J-07
TCGA-AR-A24Z-01A-11R-A169-07
TCGA-A2-A04X-01A-21R-A034-07
TCGA-OL-A66N-01A-12R-A31O-07
TCGA-E2-A15K-01A-11R-A12P-07
TCGA-LL-A6FP-01A-11R-A31O-07
TCGA-A7-A26J-01A-11R-A169-07
TCGA-B6-A0RU-01A-11R-A084-07
TCGA-BH-A0W7-01A-11R-A115-07
TCGA-PE-A5DC-01A-12R-A27Q-07
TCGA-AC-A8OP-01A-11R-A36F-07
TCGA-AC-A2FO-01A-11R-A180-07
TCGA-BH-A0H3-01A-11R-A12P-07
TCGA-BH-A18K-01A-11R-A12D-07
TCGA-A8-A075-01A-11R-A084-07
TCGA-B6-A0RT-01A-21R-A084-07
TCGA-A8-A07G-01A-11R-A034-07
TCGA-C8-A1HK-01A-21R-A13Q-07
TCGA-E2-A1IH-01A-11R-A13Q-07
TCGA-E9-A1NF-01A-11R-A14D-07
TCGA-BH-A0B0-01A-21R-A115-07
TCGA-EW-A1OZ-01A-11R-A144-07
TCGA-A7-A3RF-01A-11R-A22K-07
TCGA-BH-A0BJ-01A-11R-A056-07
TCGA-C8-A12K-01A-21R-A115-07
TCGA-AR-A0TW-01A-11R-A084-07
TCGA-BH-A1FN-01A-11R-A13Q-07
TCGA-AN-A0XL-01A-11R-A10J-07
TCGA-E2-A1LB-01A-11R-A144-07
TCGA-BH-A0H7-01A-13R-A056-07
TCGA-A2-A1FX-01A-11R-A13Q-07
TCGA-E2-A15J-01A-11R-A12P-07
TCGA-A2-A0T3-01A-21R-A115-07
TCGA-A8-A081-01A-11R-A00Z-07
TCGA-A8-A096-01A-11R-A00Z-07
TCGA-BH-A209-01A-11R-A157-07
TCGA-GM-A2D9-01A-11R-A18M-07
TCGA-A2-A0T7-01A-21R-A084-07
TCGA-D8-A1XS-01A-11R-A14M-07
TCGA-AR-A2LL-01A-11R-A180-07
TCGA-B6-A0IP-01A-11R-A034-07
TCGA-A1-A0SD-01A-11R-A115-07
TCGA-EW-A424-01A-11R-A24H-07
TCGA-3C-AALI-01A-11R-A41B-07
TCGA-B6-A0I1-01A-11R-A21T-07
TCGA-AC-A2QJ-01A-12R-A19W-07
TCGA-AR-A5QQ-01A-11R-A28M-07
TCGA-BH-A8G0-01A-11R-A352-07
TCGA-D8-A1XQ-01A-11R-A14M-07
TCGA-D8-A73U-01A-11R-A33J-07
TCGA-C8-A26Y-01A-11R-A16F-07
TCGA-AC-A8OR-01A-21R-A41B-07
TCGA-D8-A27K-01A-11R-A16F-07
TCGA-EW-A1IY-01A-11R-A13Q-07
TCGA-BH-A18V-01A-11R-A12D-07
TCGA-BH-A0B9-01A-11R-A056-07
TCGA-A2-A0T2-01A-11R-A084-07
TCGA-AR-A1AS-01A-11R-A12P-07
TCGA-E9-A1R4-01A-21R-A14D-07
TCGA-A7-A13E-01A-11R-A277-07
TCGA-E2-A107-01A-11R-A10J-07
TCGA-A2-A0T0-01A-22R-A084-07
TCGA-BH-A0W4-01A-11R-A109-07
TCGA-W8-A86G-01A-21R-A36F-07
TCGA-A8-A097-01A-11R-A034-07
TCGA-A2-A0CZ-01A-11R-A034-07
TCGA-A2-A3XV-01A-21R-A239-07
TCGA-A2-A0ST-01A-12R-A084-07
TCGA-EW-A3E8-01B-11R-A24H-07
TCGA-A7-A4SD-01A-11R-A266-07
TCGA-3C-AAAU-01A-11R-A41B-07
TCGA-LL-A6FQ-01A-11R-A31O-07
TCGA-LL-A8F5-01A-11R-A36F-07
TCGA-A7-A26J-01B-02R-A277-07
TCGA-AC-A3W5-01A-11R-A22K-07
TCGA-D8-A27L-01A-11R-A16F-07
TCGA-E2-A1IJ-01A-11R-A144-07
TCGA-E9-A229-01A-31R-A157-07
TCGA-A2-A0CL-01A-11R-A115-07
TCGA-A2-A0YG-01A-21R-A109-07
TCGA-AQ-A0Y5-01A-11R-A14M-07
TCGA-A7-A0DC-01B-04R-A22O-07
TCGA-E9-A5FK-01A-11R-A27Q-07
TCGA-E9-A1RC-01A-11R-A157-07
TCGA-A8-A0A1-01A-11R-A00Z-07
TCGA-A7-A5ZX-01A-12R-A29R-07
TCGA-OL-A5DA-01A-11R-A27Q-07
TCGA-BH-A0BC-01A-22R-A084-07
TCGA-AN-A0FN-01A-11R-A034-07
TCGA-AR-A0TV-01A-21R-A084-07
TCGA-E9-A226-01A-21R-A157-07
TCGA-A2-A0D0-01A-11R-A00Z-07
TCGA-AN-A0XU-01A-11R-A109-07
TCGA-AC-A23E-01A-11R-A157-07
TCGA-D8-A3Z6-01A-11R-A239-07
TCGA-OL-A66P-01A-11R-A31O-07
TCGA-A1-A0SK-01A-12R-A084-07
TCGA-B6-A0WX-01A-11R-A109-07
TCGA-A8-A091-01A-11R-A00Z-07
TCGA-A7-A0DA-01A-31R-A115-07
TCGA-AN-A0XR-01A-11R-A109-07
TCGA-BH-A0H0-01A-11R-A056-07
TCGA-D8-A1X9-01A-12R-A157-07
TCGA-LL-A5YN-01A-11R-A28M-07
TCGA-B6-A0WW-01A-11R-A109-07
TCGA-BH-A1FH-01A-12R-A13Q-07
TCGA-S3-A6ZG-01A-22R-A32P-07
TCGA-EW-A1P8-01A-11R-A144-07
TCGA-A7-A3IZ-01A-11R-A213-07
TCGA-OL-A66I-01A-21R-A29R-07
TCGA-LL-A5YM-01A-11R-A28M-07
TCGA-BH-A0DD-01A-31R-A12P-07
TCGA-C8-A3M8-01A-11R-A213-07
TCGA-A8-A08G-01A-11R-A00Z-07
TCGA-AR-A2LK-01A-11R-A180-07
TCGA-LD-A9QF-01A-32R-A41B-07
TCGA-BH-A1F2-01A-31R-A13Q-07
TCGA-AR-A0TT-01A-31R-A084-07
TCGA-AC-A23C-01A-12R-A169-07
TCGA-A1-A0SF-01A-11R-A144-07
TCGA-A2-A1G4-01A-11R-A13Q-07
TCGA-BH-A0AW-01A-11R-A056-07
TCGA-B6-A0IA-01A-11R-A034-07
TCGA-C8-A130-01A-31R-A115-07
TCGA-BH-A0W3-01A-11R-A109-07
TCGA-E2-A10C-01A-21R-A10J-07
TCGA-AN-A04A-01A-21R-A034-07
TCGA-E9-A227-01A-11R-A157-07
TCGA-AO-A0JG-01A-31R-A084-07
TCGA-A2-A1G1-01A-21R-A13Q-07
TCGA-AR-A24U-01A-11R-A169-07
TCGA-AC-A2FG-01A-11R-A17B-07
TCGA-A8-A06R-01A-11R-A00Z-07
TCGA-AR-A0U4-01A-11R-A109-07
TCGA-A8-A09M-01A-11R-A00Z-07
TCGA-D8-A27N-01A-11R-A16F-07
TCGA-E2-A1L9-01A-11R-A13Q-07
TCGA-BH-A5J0-01A-11R-A27Q-07
TCGA-BH-A0HX-01A-21R-A056-07
TCGA-E9-A22H-01A-11R-A157-07
TCGA-A7-A5ZV-01A-11R-A28M-07
TCGA-OL-A66O-01A-11R-A31O-07
TCGA-D8-A1JA-01A-11R-A13Q-07
TCGA-AC-A2FM-01A-11R-A19W-07
TCGA-D8-A4Z1-01A-21R-A266-07
TCGA-E2-A2P5-01A-11R-A19W-07
TCGA-OL-A5RX-01A-11R-A28M-07
TCGA-E9-A1ND-01A-11R-A144-07
TCGA-AO-A03T-01A-21R-A034-07
TCGA-A2-A04N-01A-11R-A115-07
TCGA-AO-A124-01A-11R-A10J-07
TCGA-B6-A0X0-01A-21R-A115-07
TCGA-E9-A54X-01A-11R-A266-07
TCGA-E9-A1RE-01A-11R-A157-07
TCGA-D8-A73W-01A-22R-A352-07
TCGA-A1-A0SJ-01A-11R-A084-07
TCGA-BH-A18P-01A-11R-A12D-07
TCGA-AR-A250-01A-31R-A169-07
TCGA-AR-A2LO-01A-31R-A18M-07
TCGA-C8-A135-01A-11R-A115-07
TCGA-AO-A0J3-01A-11R-A034-07
TCGA-A2-A1G6-01A-11R-A13Q-07
TCGA-GM-A2DM-01A-11R-A180-07
TCGA-B6-A0IH-01A-11R-A115-07
TCGA-A2-A3KC-01A-11R-A213-07
TCGA-BH-A202-01A-11R-A14M-07
TCGA-E2-A1L7-01A-11R-A144-07
TCGA-BH-A0HW-01A-11R-A034-07
TCGA-E2-A1IF-01A-11R-A144-07
TCGA-AO-A03N-01B-11R-A10J-07
TCGA-C8-A1HJ-01A-11R-A13Q-07
TCGA-E9-A6HE-01A-11R-A31O-07
TCGA-AR-A1AN-01A-11R-A12P-07
TCGA-E2-A15C-01A-31R-A12D-07
TCGA-A7-A0CH-01A-21R-A00Z-07
TCGA-C8-A278-01A-11R-A169-07
TCGA-A7-A425-01A-11R-A24H-07
TCGA-E2-A15H-01A-11R-A12D-07
TCGA-A8-A06N-01A-11R-A00Z-07
TCGA-E2-A570-01A-11R-A29R-07
TCGA-BH-A1FL-01A-11R-A13Q-07
TCGA-E2-A56Z-01A-12R-A29R-07
TCGA-E9-A1RI-01A-11R-A169-07
TCGA-BH-A0DP-01A-21R-A056-07
TCGA-AR-A0U3-01A-11R-A109-07
TCGA-BH-A18L-01A-32R-A12D-07
TCGA-A7-A3J1-01A-11R-A213-07
TCGA-AC-A6IW-01A-12R-A33J-07
TCGA-AC-A3YI-01A-21R-A239-07
TCGA-D8-A1XG-01A-11R-A14D-07
TCGA-A8-A082-01A-11R-A00Z-07
TCGA-OL-A5RU-01A-11R-A28M-07
TCGA-BH-A0HA-01A-11R-A12P-07
TCGA-A2-A3XS-01A-11R-A22U-07
TCGA-A2-A0ES-01A-11R-A115-07
TCGA-B6-A0RN-01A-12R-A084-07
TCGA-BH-A2L8-01A-11R-A18M-07
TCGA-E2-A108-01A-13R-A10J-07
TCGA-AN-A046-01A-21R-A034-07
TCGA-E2-A576-01A-11R-A31O-07
TCGA-A2-A3XX-01A-21R-A239-07
TCGA-C8-A137-01A-11R-A115-07
TCGA-A7-A4SC-01A-12R-A266-07
TCGA-E2-A15M-01A-11R-A12D-07
TCGA-A8-A08I-01A-11R-A00Z-07
TCGA-AC-A2FF-01A-11R-A17B-07
TCGA-E2-A1L6-01A-11R-A13Q-07
TCGA-A7-A13E-01B-06R-A277-07
TCGA-AR-A24S-01A-11R-A169-07
TCGA-E2-A155-01A-11R-A12D-07
TCGA-C8-A12M-01A-11R-A115-07
TCGA-E2-A14W-01A-11R-A12D-07
TCGA-B6-A0RQ-01A-11R-A115-07
TCGA-EW-A1IW-01A-11R-A13Q-07
TCGA-A1-A0SM-01A-11R-A084-07
TCGA-E9-A1R6-01A-11R-A14D-07
TCGA-A2-A0CQ-01A-21R-A034-07
TCGA-OL-A5D7-01A-11R-A27Q-07
TCGA-D8-A143-01A-11R-A115-07
TCGA-C8-A138-01A-11R-A115-07
TCGA-E2-A14Q-01A-11R-A12D-07
TCGA-A2-A0YL-01A-21R-A109-07
TCGA-PL-A8LY-01A-11R-A41B-07
TCGA-LL-A440-01A-11R-A24H-07
TCGA-D8-A27M-01A-11R-A16F-07
TCGA-BH-A0DS-01A-11R-A056-07
TCGA-AC-A3TM-01A-11R-A22K-07
TCGA-AR-A255-01A-11R-A169-07
TCGA-B6-A0WY-01A-11R-A109-07
TCGA-BH-A1ET-01A-11R-A137-07
TCGA-AR-A24K-01A-11R-A169-07
TCGA-B6-A0IJ-01A-11R-A034-07
TCGA-D8-A1JN-01A-11R-A13Q-07
TCGA-EW-A1P0-01A-11R-A144-07
TCGA-A2-A25C-01A-11R-A169-07
TCGA-A7-A0DB-01A-11R-A00Z-07
TCGA-S3-AA15-01A-11R-A41B-07
TCGA-AR-A1AW-01A-21R-A12P-07
TCGA-E9-A5FL-01A-11R-A27Q-07
TCGA-A8-A092-01A-11R-A00Z-07
TCGA-D8-A13Z-01A-11R-A115-07
TCGA-AR-A24O-01A-11R-A169-07
TCGA-AO-A0JD-01A-11R-A056-07
TCGA-BH-A0HF-01A-11R-A056-07
TCGA-PE-A5DD-01A-12R-A27Q-07
TCGA-AR-A0U2-01A-11R-A109-07
TCGA-AC-A3HN-01A-11R-A213-07
TCGA-AN-A0AL-01A-11R-A00Z-07
TCGA-B6-A0RL-01A-11R-A084-07
TCGA-C8-A274-01A-11R-A16F-07
TCGA-A2-A0CP-01A-11R-A034-07
TCGA-BH-A0H5-01A-21R-A115-07
TCGA-A2-A0EW-01A-21R-A115-07
TCGA-D8-A145-01A-11R-A115-07
TCGA-A7-A13G-01B-04R-A22O-07
TCGA-AN-A0XS-01A-22R-A109-07
TCGA-D8-A27V-01A-12R-A17B-07
TCGA-D8-A27F-01A-11R-A16F-07
TCGA-AN-A0AS-01A-11R-A00Z-07
TCGA-AO-A0J5-01A-11R-A034-07
TCGA-D8-A1Y0-01A-11R-A14M-07
TCGA-BH-A0EI-01A-11R-A115-07
TCGA-BH-A0DI-01A-21R-A12P-07
TCGA-D8-A1XM-01A-21R-A14M-07
TCGA-BH-A0DZ-01A-11R-A00Z-07
TCGA-A8-A08H-01A-21R-A00Z-07
TCGA-A2-A3Y0-01A-11R-A239-07
TCGA-BH-A0C1-01B-11R-A12D-07
TCGA-BH-A0EB-01A-11R-A034-07
TCGA-E2-A15T-01A-11R-A115-07
TCGA-C8-A1HI-01A-11R-A137-07
TCGA-A2-A0EM-01A-11R-A034-07
TCGA-3C-AALJ-01A-31R-A41B-07
TCGA-E9-A1RG-01A-11R-A14D-07
TCGA-A8-A0A7-01A-11R-A00Z-07
TCGA-E2-A1B0-01A-11R-A12P-07
TCGA-BH-A28O-01A-11R-A22K-07
TCGA-B6-A0RE-01A-11R-A056-07
TCGA-A7-A13F-01A-11R-A12P-07
TCGA-C8-A1HE-01A-11R-A13Q-07
TCGA-BH-A1EY-01A-11R-A13Q-07
TCGA-AC-A3TN-01A-11R-A22K-07
TCGA-BH-A0DK-01A-21R-A056-07
TCGA-A2-A04R-01A-41R-A109-07
TCGA-E2-A1B4-01A-11R-A12P-07
TCGA-D8-A1XO-01A-11R-A14M-07
TCGA-AN-A0FD-01A-11R-A034-07
TCGA-A8-A099-01A-11R-A00Z-07
TCGA-GM-A5PV-01A-11R-A28M-07
TCGA-E9-A1R0-01A-22R-A16F-07
TCGA-AR-A1AP-01A-11R-A12P-07
TCGA-AC-A62X-01A-11R-A29R-07
TCGA-A2-A0EP-01A-52R-A22U-07
TCGA-E9-A1RF-01A-11R-A157-07
TCGA-AR-A2LJ-01A-12R-A19W-07
TCGA-E2-A9RU-01A-11R-A41B-07
TCGA-A2-A0YE-01A-11R-A109-07
TCGA-AR-A5QN-01A-12R-A28M-07
TCGA-C8-A12Y-01A-11R-A12D-07
TCGA-AR-A24T-01A-11R-A169-07
TCGA-A7-A26J-01A-11R-A277-07
TCGA-GM-A2DK-01A-21R-A180-07
TCGA-B6-A0RO-01A-22R-A084-07
TCGA-D8-A142-01A-11R-A115-07
TCGA-C8-A8HP-01A-11R-A36F-07
TCGA-E9-A24A-01A-11R-A169-07
TCGA-AO-A0JE-01A-11R-A056-07
TCGA-AR-A1AU-01A-11R-A12P-07
TCGA-E9-A1QZ-01A-21R-A169-07
TCGA-A7-A13H-01A-11R-A22K-07
TCGA-B6-A40B-01A-11R-A239-07
TCGA-GM-A3XG-01A-31R-A24H-07
TCGA-E2-A109-01A-11R-A10J-07
TCGA-D8-A1JF-01A-11R-A13Q-07
TCGA-E9-A1RA-01A-11R-A14D-07
TCGA-BH-A0DO-01B-11R-A12D-07
TCGA-A2-A4S0-01A-21R-A266-07
TCGA-A8-A07J-01A-11R-A00Z-07
TCGA-AN-A0AJ-01A-11R-A00Z-07
TCGA-AO-A12G-01A-11R-A10J-07
TCGA-AR-A2LM-01A-11R-A180-07
TCGA-EW-A1PB-01A-11R-A144-07
TCGA-A2-A0YT-01A-11R-A109-07
TCGA-E2-A15E-01A-11R-A12D-07
TCGA-E9-A1R7-01A-11R-A14M-07
TCGA-BH-A0BD-01A-11R-A034-07
TCGA-AN-A0AM-01A-11R-A034-07
TCGA-B6-A0RG-01A-11R-A056-07
TCGA-S3-AA10-01A-21R-A41B-07

## Sheet: COAD
TCGA barcode
TCGA-AA-3518-11A-01R-1672-07
TCGA-A6-5662-11A-01R-1653-07
TCGA-AZ-6603-11A-02R-1839-07
TCGA-AA-3496-11A-01R-1839-07
TCGA-AZ-6605-11A-01R-1839-07
TCGA-AA-3516-11A-01R-A32Z-07
TCGA-A6-5667-11A-01R-1723-07
TCGA-A6-2684-11A-01R-A32Z-07
TCGA-A6-2685-11A-01R-A32Z-07
TCGA-AA-3489-11A-01R-1839-07
TCGA-AA-3525-11A-01R-A32Z-07
TCGA-AA-3522-11A-01R-A32Z-07
TCGA-AA-3660-11A-01R-1723-07
TCGA-A6-2686-11A-01R-A32Z-07
TCGA-AA-3712-11A-01R-1723-07
TCGA-A6-2683-11A-01R-A32Z-07
TCGA-AA-3534-11A-01R-A32Z-07
TCGA-AA-3713-11A-01R-1723-07
TCGA-AZ-6600-11A-01R-1774-07
TCGA-AA-3697-11A-01R-1723-07
TCGA-F4-6704-11A-01R-1839-07
TCGA-A6-2671-11A-01R-A32Z-07
TCGA-AA-3663-11A-01R-1723-07
TCGA-AZ-6598-11A-01R-1774-07
TCGA-AA-3655-11A-01R-1723-07
TCGA-A6-2682-11A-01R-A32Z-07
TCGA-A6-2680-11A-01R-A32Z-07
TCGA-A6-2679-11A-01R-A32Z-07
TCGA-A6-5659-11A-01R-1653-07
TCGA-AA-3527-11A-01R-A32Z-07
TCGA-AA-3517-11A-01R-A32Z-07
TCGA-AA-3520-11A-01R-A32Z-07
TCGA-AA-3531-11A-01R-A32Z-07
TCGA-A6-2678-11A-01R-A32Z-07
TCGA-AA-3514-11A-01R-A32Z-07
TCGA-AA-3511-11A-01R-1839-07
TCGA-AZ-6601-11A-01R-1774-07
TCGA-A6-2675-11A-01R-1723-07
TCGA-AA-3662-11A-01R-1723-07
TCGA-AZ-6599-11A-01R-1774-07
TCGA-A6-5665-11A-01R-1653-07
TCGA-4T-AA8H-01A-11R-A41B-07
TCGA-AA-A00Q-01A-01R-A002-07
TCGA-AZ-4614-01A-01R-1410-07
TCGA-A6-2675-01A-02R-1723-07
TCGA-AA-A00U-01A-01R-A002-07
TCGA-A6-6781-01A-22R-1928-07
TCGA-CM-6169-01A-11R-1653-07
TCGA-AA-3516-01A-02R-0826-07
TCGA-AA-3552-01A-01R-0821-07
TCGA-D5-6931-01A-11R-1928-07
TCGA-SS-A7HO-01A-21R-A37K-07
TCGA-AZ-6605-01A-11R-1839-07
TCGA-CA-6717-01A-11R-1839-07
TCGA-NH-A8F7-01A-11R-A41B-07
TCGA-AD-6965-01A-11R-1928-07
TCGA-AA-A02H-01A-01R-A089-07
TCGA-AA-A022-01A-21R-A16W-07
TCGA-AA-3680-01A-01R-0905-07
TCGA-A6-6650-01A-11R-1774-07
TCGA-G4-6311-01A-11R-1723-07
TCGA-A6-2677-01B-02R-A277-07
TCGA-AA-3815-01A-01R-1022-07
TCGA-CK-4951-01A-01R-1410-07
TCGA-CK-6748-01A-11R-1839-07
TCGA-CA-5255-01A-11R-1839-07
TCGA-CK-4952-01A-01R-1723-07
TCGA-AZ-4315-01A-01R-1410-07
TCGA-AA-3869-01A-01R-1022-07
TCGA-G4-6626-01A-11R-1774-07
TCGA-DM-A1D7-01A-11R-A155-07
TCGA-AA-3531-01A-01R-0821-07
TCGA-A6-5662-01A-01R-1653-07
TCGA-CM-4744-01A-01R-A32Z-07
TCGA-D5-5540-01A-01R-1653-07
TCGA-AZ-6608-01A-11R-1839-07
TCGA-AA-3518-01A-02R-0826-07
TCGA-CM-5863-01A-21R-1839-07
TCGA-A6-5666-01A-01R-1653-07
TCGA-DM-A280-01A-12R-A16W-07
TCGA-AA-3973-01A-01R-1022-07
TCGA-CM-4748-01A-01R-1410-07
TCGA-D5-6530-01A-11R-1723-07
TCGA-A6-6137-01A-11R-1774-07
TCGA-DM-A1D6-01A-21R-A155-07
TCGA-D5-6923-01A-11R-A32Z-07
TCGA-A6-2681-01A-01R-1410-07
TCGA-F4-6463-01A-11R-1723-07
TCGA-AZ-6599-01A-11R-1774-07
TCGA-D5-6532-01A-11R-1723-07
TCGA-AA-3489-01A-21R-1839-07
TCGA-CM-6171-01A-11R-1653-07
TCGA-AA-A00R-01A-01R-A002-07
TCGA-DM-A28C-01A-11R-A32Y-07
TCGA-AA-A01T-01A-21R-A16W-07
TCGA-AA-A02E-01A-01R-A00A-07
TCGA-CM-5860-01A-01R-1653-07
TCGA-A6-6141-01A-11R-1774-07
TCGA-AA-A00D-01A-01R-A002-07
TCGA-G4-6628-01A-11R-1839-07
TCGA-AA-3688-01A-01R-0905-07
TCGA-AA-3492-01A-01R-1410-07
TCGA-AA-3819-01A-01R-0905-07
TCGA-A6-2678-01A-01R-0821-07
TCGA-AA-3521-01A-01R-0821-07
TCGA-DM-A1DA-01A-11R-A155-07
TCGA-AA-3864-01A-01R-1022-07
TCGA-F4-6855-01A-11R-1928-07
TCGA-F4-6856-01A-11R-1928-07
TCGA-DM-A0X9-01A-11R-A155-07
TCGA-A6-5659-01A-01R-1653-07
TCGA-AZ-6598-01A-11R-1774-07
TCGA-AA-3519-01A-02R-0821-07
TCGA-DM-A1HB-01A-21R-A180-07
TCGA-A6-A567-01A-31R-A28H-07
TCGA-AA-3970-01A-01R-1022-07
TCGA-CA-5796-01A-01R-1653-07
TCGA-5M-AAT6-01A-11R-A41B-07
TCGA-CM-6163-01A-11R-1653-07
TCGA-AD-6889-01A-11R-1928-07
TCGA-CM-4751-01A-02R-1839-07
TCGA-AA-3982-01A-02R-1022-07
TCGA-AA-A00A-01A-01R-A002-07
TCGA-D5-6924-01A-11R-1928-07
TCGA-AA-3502-01A-01R-1410-07
TCGA-D5-7000-01A-11R-A32Z-07
TCGA-D5-6540-01A-11R-1723-07
TCGA-D5-6932-01A-11R-1928-07
TCGA-CK-5912-01A-11R-1653-07
TCGA-AA-3538-01A-01R-0821-07
TCGA-AA-3930-01A-01R-1022-07
TCGA-AA-A00W-01A-01R-A002-07
TCGA-AA-3555-01A-01R-0821-07
TCGA-AA-3655-01A-02R-1723-07
TCGA-AA-3989-01A-01R-1022-07
TCGA-5M-AATA-01A-31R-A41B-07
TCGA-5M-AAT4-01A-11R-A41B-07
TCGA-AA-A02R-01A-01R-A00A-07
TCGA-A6-6649-01A-11R-1774-07
TCGA-A6-3809-01B-04R-A277-07
TCGA-AY-4070-01A-01R-1113-07
TCGA-G4-6299-01A-11R-1774-07
TCGA-AA-A02O-01A-21R-A16W-07
TCGA-AA-3972-01A-01R-1022-07
TCGA-NH-A50T-01A-11R-A28H-07
TCGA-DM-A0XD-01A-12R-A155-07
TCGA-AU-6004-01A-11R-1723-07
TCGA-AA-3841-01A-01R-0905-07
TCGA-DM-A28E-01A-11R-A32Y-07
TCGA-AA-A00E-01A-01R-A002-07
TCGA-AA-3514-01A-02R-0821-07
TCGA-AA-A01F-01A-01R-A002-07
TCGA-A6-5665-01B-03R-2302-07
TCGA-G4-6315-01A-11R-1723-07
TCGA-F4-6459-01A-11R-1774-07
TCGA-D5-6926-01A-11R-1928-07
TCGA-CK-6747-01A-11R-1839-07
TCGA-DM-A1D8-01A-11R-A155-07
TCGA-AA-3858-01A-01R-0905-07
TCGA-AA-3522-01A-01R-0821-07
TCGA-G4-6314-01A-11R-1723-07
TCGA-AA-3544-01A-01R-1873-07
TCGA-NH-A6GA-01A-11R-A37K-07
TCGA-D5-6537-01A-11R-1723-07
TCGA-AZ-4684-01A-01R-1410-07
TCGA-G4-6302-01A-11R-1723-07
TCGA-AA-3862-01A-01R-1022-07
TCGA-A6-2685-01A-01R-1410-07
TCGA-AA-3712-01A-21R-1723-07
TCGA-AA-3562-01A-02R-0821-07
TCGA-AA-3846-01A-01R-1022-07
TCGA-A6-A565-01A-31R-A28H-07
TCGA-AU-3779-01A-01R-1723-07
TCGA-A6-2684-01A-01R-A278-07
TCGA-AA-3561-01A-01R-0821-07
TCGA-CM-5341-01A-01R-1410-07
TCGA-A6-2683-01A-01R-0821-07
TCGA-AA-A004-01A-01R-A00A-07
TCGA-AA-3529-01A-02R-0821-07
TCGA-AA-3861-01A-01R-1022-07
TCGA-AA-3844-01A-01R-1022-07
TCGA-AA-3952-01A-01R-1022-07
TCGA-D5-5537-01A-21R-1928-07
TCGA-AA-3837-01A-01R-0905-07
TCGA-AA-3511-01A-21R-1839-07
TCGA-D5-6922-01A-11R-1928-07
TCGA-AA-3556-01A-01R-0821-07
TCGA-CM-6674-01A-11R-1839-07
TCGA-AA-3939-01A-01R-1022-07
TCGA-AA-A00K-01A-02R-A002-07
TCGA-DM-A28A-01A-21R-A32Y-07
TCGA-CK-5914-01A-11R-1653-07
TCGA-G4-6320-01A-11R-1723-07
TCGA-A6-A5ZU-01A-11R-A28H-07
TCGA-AA-3495-01A-01R-1410-07
TCGA-QL-A97D-01A-12R-A41B-07
TCGA-CM-5868-01A-01R-1653-07
TCGA-AA-3534-01A-01R-0821-07
TCGA-AA-3693-01A-01R-0905-07
TCGA-AA-A02J-01A-01R-A00A-07
TCGA-D5-5541-01A-01R-1653-07
TCGA-AA-3860-01A-02R-0905-07
TCGA-A6-5657-01A-01R-A32Z-07
TCGA-AA-3812-01A-01R-0905-07
TCGA-DM-A1D4-01A-21R-A155-07
TCGA-AA-3854-01A-01R-0905-07
TCGA-CK-4950-01A-01R-1723-07
TCGA-D5-6541-01A-11R-1723-07
TCGA-QG-A5YV-01A-11R-A28H-07
TCGA-AD-6901-01A-11R-1928-07
TCGA-AA-3526-01A-02R-A32Z-07
TCGA-DM-A1HA-01A-11R-A155-07
TCGA-AA-A02W-01A-01R-A00A-07
TCGA-AA-A00F-01A-01R-A002-07
TCGA-AA-A02Y-01A-43R-A32Y-07
TCGA-A6-6780-01B-04R-A277-07
TCGA-AA-3525-01A-02R-0826-07
TCGA-A6-6650-01A-11R-A278-07
TCGA-CM-4752-01A-01R-1410-07
TCGA-A6-3809-01A-01R-A278-07
TCGA-CM-6680-01A-11R-1839-07
TCGA-AD-A5EK-01A-11R-A28H-07
TCGA-A6-2682-01A-01R-1410-07
TCGA-CM-6164-01A-11R-1653-07
TCGA-DM-A28H-01A-11R-A16W-07
TCGA-D5-6898-01A-11R-1928-07
TCGA-A6-3808-01A-01R-1022-07
TCGA-A6-6780-01A-11R-A278-07
TCGA-AA-3662-01A-01R-1723-07
TCGA-CM-5864-01A-01R-1653-07
TCGA-NH-A6GB-01A-11R-A37K-07
TCGA-NH-A8F8-01A-72R-A41B-07
TCGA-CM-6677-01A-11R-1839-07
TCGA-AA-3949-01A-01R-1022-07
TCGA-DM-A1D9-01A-11R-A155-07
TCGA-D5-6930-01A-11R-1928-07
TCGA-AA-3980-01A-02R-1022-07
TCGA-CA-5797-01A-01R-1653-07
TCGA-AA-3494-01A-01R-1410-07
TCGA-D5-6531-01A-11R-1723-07
TCGA-AZ-4615-01A-01R-1410-07
TCGA-A6-5656-01B-02R-A277-07
TCGA-A6-2684-01A-01R-1410-07
TCGA-CM-4743-01A-01R-1723-07
TCGA-AA-A01K-01A-01R-A00A-07
TCGA-NH-A50U-01A-33R-A37K-07
TCGA-D5-6928-01A-11R-1928-07
TCGA-DM-A28K-01A-21R-A32Y-07
TCGA-AY-6196-01A-11R-1723-07
TCGA-CM-5344-01A-21R-1723-07
TCGA-G4-6309-01A-21R-1839-07
TCGA-CM-6165-01A-11R-1653-07
TCGA-AY-5543-01A-01R-1653-07
TCGA-CM-6167-01A-11R-1653-07
TCGA-AA-3664-01A-01R-0905-07
TCGA-AZ-4313-01A-01R-1410-07
TCGA-AA-3530-01A-01R-1022-07
TCGA-AA-3877-01A-01R-1022-07
TCGA-D5-6535-01A-11R-1723-07
TCGA-CM-6678-01A-11R-1839-07
TCGA-CM-4746-01A-01R-1410-07
TCGA-A6-6652-01A-11R-1774-07
TCGA-A6-6781-01A-22R-A278-07
TCGA-AA-A01Q-01A-01R-A002-07
TCGA-A6-5661-01A-01R-1653-07
TCGA-5M-AATE-01A-11R-A41B-07
TCGA-DM-A1D0-01A-11R-A155-07
TCGA-AA-3681-01A-01R-0905-07
TCGA-D5-5538-01A-01R-1653-07
TCGA-AA-3870-01A-01R-1022-07
TCGA-CM-6679-01A-11R-1839-07
TCGA-T9-A92H-01A-11R-A37K-07
TCGA-A6-3809-01A-01R-1022-07
TCGA-AA-3818-01A-01R-0905-07
TCGA-CA-5254-01A-21R-1839-07
TCGA-AA-3672-01A-01R-0905-07
TCGA-AD-5900-01A-11R-1653-07
TCGA-CA-6719-01A-11R-1839-07
TCGA-A6-6654-01A-21R-1839-07
TCGA-CM-6161-01A-11R-1653-07
TCGA-AA-3814-01A-01R-0905-07
TCGA-AA-3697-01A-01R-1723-07
TCGA-AA-3532-01A-01R-0821-07
TCGA-AZ-6606-01A-11R-1839-07
TCGA-CK-4947-01B-11R-1653-07
TCGA-A6-2674-01A-02R-0821-07
TCGA-CA-6716-01A-11R-1839-07
TCGA-NH-A6GC-01A-12R-A41B-07
TCGA-AA-3848-01A-01R-0905-07
TCGA-AA-3684-01A-02R-0905-07
TCGA-F4-6807-01A-11R-1839-07
TCGA-AA-3875-01A-01R-0905-07
TCGA-G4-6297-01A-11R-1723-07
TCGA-A6-5660-01A-01R-1653-07
TCGA-AZ-6607-01A-11R-1839-07
TCGA-AZ-4308-01A-01R-1410-07
TCGA-AA-3524-01A-02R-0821-07
TCGA-AA-3975-01A-01R-1022-07
TCGA-AA-3666-01A-02R-0905-07
TCGA-AA-3872-01A-01R-1022-07
TCGA-AA-3979-01A-01R-1022-07
TCGA-CM-6168-01A-11R-1653-07
TCGA-G4-6588-01A-11R-1774-07
TCGA-CM-5348-01A-21R-1723-07
TCGA-AA-3553-01A-01R-0821-07
TCGA-AA-3833-01A-01R-0905-07
TCGA-G4-6295-01A-11R-1723-07
TCGA-A6-2677-01A-01R-0821-07
TCGA-AA-3867-01A-01R-1022-07
TCGA-AA-A00N-01A-02R-A00A-07
TCGA-CK-5915-01A-11R-1653-07
TCGA-AA-3520-01A-01R-0821-07
TCGA-A6-5665-01A-01R-1653-07
TCGA-G4-6303-01A-11R-1774-07
TCGA-AA-A03F-01A-11R-A16W-07
TCGA-DM-A1DB-01A-11R-A155-07
TCGA-CM-6170-01A-11R-1653-07
TCGA-A6-2680-01A-01R-1410-07
TCGA-QG-A5YW-01A-11R-A28H-07
TCGA-AA-A024-01A-02R-A00A-07
TCGA-DM-A285-01A-11R-A16W-07
TCGA-QG-A5YX-01A-11R-A28H-07
TCGA-AA-A017-01A-01R-A00A-07
TCGA-AA-3509-01A-01R-1410-07
TCGA-D5-6920-01A-11R-1928-07
TCGA-D5-6534-01A-21R-1928-07
TCGA-A6-5661-01B-05R-2302-07
TCGA-AA-3496-01A-21R-1839-07
TCGA-AA-A02K-01A-03R-A32Y-07
TCGA-AA-3685-01A-02R-A32Z-07
TCGA-AA-3851-01A-01R-1022-07
TCGA-DM-A282-01A-12R-A16W-07
TCGA-AA-3543-01A-01R-0826-07
TCGA-F4-6805-01A-11R-1839-07
TCGA-AA-3821-01A-01R-1022-07
TCGA-F4-6460-01A-11R-1774-07
TCGA-AZ-5407-01A-01R-1723-07
TCGA-D5-6929-01A-31R-1928-07
TCGA-AA-3984-01A-02R-1022-07
TCGA-A6-5664-01A-21R-1839-07
TCGA-AM-5821-01A-01R-1653-07
TCGA-AA-3488-01A-01R-1410-07
TCGA-AA-3956-01A-02R-1022-07
TCGA-G4-6298-01A-11R-1723-07
TCGA-DM-A28F-01A-11R-A32Y-07
TCGA-AA-A00J-01A-02R-A002-07
TCGA-A6-6142-01A-11R-1774-07
TCGA-G4-6304-01A-11R-1928-07
TCGA-A6-2674-01A-02R-A278-07
TCGA-G4-6310-01A-11R-1723-07
TCGA-AA-3866-01A-01R-1022-07
TCGA-F4-6806-01A-11R-1839-07
TCGA-AY-A8YK-01A-11R-A41B-07
TCGA-AA-3852-01A-01R-0905-07
TCGA-D5-5539-01A-01R-1653-07
TCGA-AZ-6601-01A-11R-1774-07
TCGA-AA-3994-01A-01R-1113-07
TCGA-G4-6307-01A-11R-1723-07
TCGA-CM-4747-01A-01R-1410-07
TCGA-NH-A50V-01A-11R-A28H-07
TCGA-A6-5667-01A-21R-1723-07
TCGA-NH-A5IV-01A-42R-A37K-07
TCGA-AA-3667-01A-01R-0905-07
TCGA-QG-A5Z2-01A-11R-A28H-07
TCGA-AA-A01X-01A-21R-A083-07
TCGA-AY-6197-01A-11R-1723-07
TCGA-AA-3517-01A-01R-0821-07
TCGA-AA-3968-01A-01R-1022-07
TCGA-AA-3713-01A-21R-1723-07
TCGA-AA-3527-01A-01R-0821-07
TCGA-AA-3673-01A-01R-0905-07
TCGA-AA-3856-01A-01R-0905-07
TCGA-CM-6676-01A-11R-1839-07
TCGA-A6-2679-01A-02R-1410-07
TCGA-DM-A28M-01A-12R-A16W-07
TCGA-AA-A010-01A-01R-A089-07
TCGA-AD-6548-01A-11R-1839-07
TCGA-AA-3554-01A-01R-0826-07
TCGA-CK-5913-01A-11R-1653-07
TCGA-AA-A01S-01A-21R-A083-07
TCGA-AA-3660-01A-01R-1723-07
TCGA-CM-6166-01A-11R-1653-07
TCGA-AA-A01P-01A-21R-A083-07
TCGA-DM-A28G-01A-11R-A16W-07
TCGA-CA-5256-01A-01R-1410-07
TCGA-CM-6675-01A-11R-1839-07
TCGA-AA-A029-01A-01R-A00A-07
TCGA-AA-3678-01A-01R-0905-07
TCGA-A6-6140-01A-11R-1774-07
TCGA-AA-3986-01A-02R-1022-07
TCGA-G4-6293-01A-11R-1723-07
TCGA-D5-6538-01A-11R-1723-07
TCGA-AA-3941-01A-01R-1022-07
TCGA-G4-6317-01A-11R-1723-07
TCGA-AA-A01D-01A-01R-A00A-07
TCGA-CM-5862-01A-01R-1653-07
TCGA-CK-5916-01A-11R-1653-07
TCGA-AA-3692-01A-01R-0905-07
TCGA-AA-A00O-01A-02R-A089-07
TCGA-AZ-4323-01A-21R-1839-07
TCGA-A6-6648-01A-11R-1774-07
TCGA-AA-A01Z-01A-11R-A083-07
TCGA-WS-AB45-01A-11R-A41B-07
TCGA-CM-5861-01A-01R-1653-07
TCGA-A6-6138-01A-11R-1774-07
TCGA-AA-A01G-01A-01R-A002-07
TCGA-AM-5820-01A-01R-1653-07
TCGA-A6-5659-01B-04R-A277-07
TCGA-AA-3845-01A-01R-1022-07
TCGA-AA-A02F-01A-01R-A089-07
TCGA-G4-6322-01A-11R-1723-07
TCGA-3L-AA1B-01A-11R-A37K-07
TCGA-AZ-6603-01A-11R-1839-07
TCGA-AZ-5403-01A-01R-1653-07
TCGA-G4-6323-01A-11R-1723-07
TCGA-AA-3811-01A-01R-1022-07
TCGA-AA-3831-01A-01R-0905-07
TCGA-AY-A54L-01A-11R-A28H-07
TCGA-AD-6963-01A-11R-1928-07
TCGA-A6-A566-01A-11R-A28H-07
TCGA-5M-AAT5-01A-21R-A41B-07
TCGA-CA-6718-01A-11R-1839-07
TCGA-G4-6627-01A-11R-1774-07
TCGA-G4-6625-01A-21R-1774-07
TCGA-A6-5656-01A-21R-1839-07
TCGA-AA-3710-01A-01R-1022-07
TCGA-G4-6306-01A-11R-1774-07
TCGA-F4-6854-01A-11R-1928-07
TCGA-AD-6890-01A-11R-1928-07
TCGA-A6-3807-01A-01R-1022-07
TCGA-A6-6782-01A-11R-1839-07
TCGA-AA-A01C-01A-01R-A00A-07
TCGA-AA-3855-01A-01R-1022-07
TCGA-A6-6653-01A-11R-1774-07
TCGA-AA-A01R-01A-21R-A083-07
TCGA-A6-6650-01B-02R-A277-07
TCGA-A6-2671-01A-01R-1410-07
TCGA-AA-3663-01A-01R-1723-07
TCGA-A6-2672-01A-01R-0826-07
TCGA-G4-6294-01A-11R-1774-07
TCGA-A6-2676-01A-01R-0826-07
TCGA-AA-3549-01A-02R-0821-07
TCGA-CM-5349-01A-21R-1723-07
TCGA-AA-A01V-01A-23R-A083-07
TCGA-A6-6780-01A-11R-1839-07
TCGA-AZ-4682-01B-01R-A32Z-07
TCGA-AA-3842-01A-01R-1022-07
TCGA-AA-3542-01A-02R-1873-07
TCGA-AA-3560-01A-01R-0821-07
TCGA-AA-A01I-01A-02R-A089-07
TCGA-AY-A71X-01A-12R-A37K-07
TCGA-F4-6809-01A-11R-1839-07
TCGA-G4-6321-01A-11R-1723-07
TCGA-CM-6172-01A-11R-1653-07
TCGA-AD-A5EJ-01A-11R-A28H-07
TCGA-AA-3966-01A-01R-1113-07
TCGA-AA-A00L-01A-01R-A002-07
TCGA-D5-6927-01A-21R-1928-07
TCGA-D5-6536-01A-11R-1723-07
TCGA-D5-6539-01A-11R-1723-07
TCGA-A6-2686-01A-01R-A32Z-07
TCGA-A6-3810-01A-01R-A278-07
TCGA-F4-6461-01A-11R-1774-07
TCGA-A6-5659-01A-01R-A278-07
TCGA-AD-6895-01A-11R-1928-07
TCGA-A6-3810-01A-01R-1022-07
TCGA-AA-3510-01A-01R-1410-07
TCGA-A6-2684-01C-08R-A277-07
TCGA-CA-6715-01A-21R-1839-07
TCGA-AA-3850-01A-01R-1022-07
TCGA-AZ-4616-01A-21R-1839-07
TCGA-AA-3715-01A-01R-0905-07
TCGA-AA-3506-01A-01R-1410-07
TCGA-AD-6964-01A-11R-1928-07
TCGA-G4-6586-01A-11R-1774-07
TCGA-AZ-6600-01A-11R-1774-07
TCGA-AA-3675-01A-02R-0905-07
TCGA-D5-6529-01A-11R-1774-07
TCGA-A6-2672-01B-03R-2302-07
TCGA-4N-A93T-01A-11R-A37K-07
TCGA-AA-3696-01A-01R-0905-07
TCGA-AA-3679-01A-02R-0905-07
TCGA-A6-2674-01B-04R-A277-07
TCGA-AA-A03J-01A-21R-A16W-07
TCGA-F4-6703-01A-11R-1839-07
TCGA-A6-6781-01B-06R-A277-07
TCGA-CK-4948-01B-11R-1653-07
TCGA-RU-A8FL-01A-11R-A37K-07
TCGA-A6-3810-01B-04R-A277-07
TCGA-AY-A69D-01A-11R-A37K-07
TCGA-F4-6808-01A-11R-1839-07
TCGA-CM-6162-01A-11R-1653-07
TCGA-F4-6704-01A-11R-1839-07
TCGA-AD-6888-01A-11R-1928-07
TCGA-A6-A56B-01A-31R-A28H-07
TCGA-CM-4750-01A-01R-1410-07
TCGA-A6-4105-01A-02R-1774-07
TCGA-AA-3548-01A-01R-1873-07
TCGA-AY-6386-01A-21R-1723-07
TCGA-AY-4071-01A-01R-1113-07
TCGA-F4-6569-01A-11R-1774-07
TCGA-AA-3976-01A-01R-1022-07
TCGA-A6-5656-01A-21R-A278-07
TCGA-AD-6899-01A-11R-1928-07
TCGA-A6-6651-01A-21R-1839-07
TCGA-AA-3977-01A-01R-1022-07
TCGA-AA-A00Z-01A-01R-A002-07
TCGA-D5-6533-01A-11R-1723-07
TCGA-CK-6746-01A-11R-1839-07
TCGA-DM-A288-01A-11R-A16W-07
TCGA-A6-4107-01A-02R-1410-07
TCGA-QG-A5Z1-01A-11R-A28H-07
TCGA-DM-A0XF-01A-11R-A155-07
TCGA-AA-3947-01A-01R-1022-07
TCGA-AA-3950-01A-02R-1022-07
TCGA-AA-3971-01A-01R-1022-07
TCGA-CK-6751-01A-11R-1839-07
TCGA-F4-6570-01A-11R-1774-07
TCGA-AA-3955-01A-02R-1022-07

## Sheet: HNSC
TCGA barcode
TCGA-CV-7440-11A-01R-2187-07
TCGA-CV-7097-11A-01R-2016-07
TCGA-H7-A6C4-11A-21R-A466-07
TCGA-CV-6935-11A-01R-1915-07
TCGA-HD-A6I0-11A-11R-A31N-07
TCGA-CV-7245-11A-01R-2016-07
TCGA-CV-7423-11A-01R-2081-07
TCGA-CV-7438-11A-01R-2132-07
TCGA-CV-7252-11A-01R-2016-07
TCGA-CV-7183-11A-01R-2016-07
TCGA-CV-7235-11A-01R-2016-07
TCGA-CV-7101-11A-01R-2016-07
TCGA-CV-6939-11A-01R-1915-07
TCGA-H7-A6C5-11A-11R-A30B-07
TCGA-CV-6933-11A-01R-1915-07
TCGA-CV-6960-11A-01R-2016-07
TCGA-CV-7177-11A-01R-2016-07
TCGA-CV-6938-11A-01R-1915-07
TCGA-CV-7250-11A-01R-2016-07
TCGA-CV-6936-11A-01R-1915-07
TCGA-CV-7437-11A-01R-2132-07
TCGA-CV-6962-11A-01R-1915-07
TCGA-HD-A6HZ-11A-11R-A31N-07
TCGA-CV-6956-11A-01R-2016-07
TCGA-CV-7425-11A-01R-2081-07
TCGA-HD-8635-11A-01R-2403-07
TCGA-CV-7103-11A-01R-2016-07
TCGA-CV-7178-11A-01R-2016-07
TCGA-CV-7416-11A-01R-2081-07
TCGA-CV-6961-11A-01R-1915-07
TCGA-CV-7432-11A-01R-2132-07
TCGA-CV-6959-11A-01R-1915-07
TCGA-CV-6955-11A-01R-2016-07
TCGA-CV-7406-11A-01R-2081-07
TCGA-CV-7434-11A-01R-2132-07
TCGA-CV-7424-11A-01R-2081-07
TCGA-CV-7242-11A-01R-2016-07
TCGA-CV-7261-11A-01R-2016-07
TCGA-CV-6943-11A-01R-1915-07
TCGA-CV-7238-11A-01R-2016-07
TCGA-CV-6934-11A-01R-1915-07
TCGA-CV-7091-11A-01R-2016-07
TCGA-CV-7255-11A-01R-2016-07
TCGA-WA-A7GZ-11A-11R-A34R-07
TCGA-CV-A45V-01A-21R-A24Z-07
TCGA-H7-7774-01A-21R-2081-07
TCGA-CQ-A4CG-01A-11R-A266-07
TCGA-CV-5970-01A-11R-1686-07
TCGA-HD-8635-01A-11R-2403-07
TCGA-CV-7250-01A-11R-2016-07
TCGA-CR-6487-01A-11R-1873-07
TCGA-CN-6018-01A-11R-1686-07
TCGA-CR-6484-01A-11R-1873-07
TCGA-CN-6996-01A-11R-1915-07
TCGA-CN-5356-01A-01R-1436-07
TCGA-CN-6017-01A-11R-1686-07
TCGA-CR-7369-01A-11R-2132-07
TCGA-P3-A6T8-01A-11R-A34R-07
TCGA-F7-A50J-01A-21R-A28V-07
TCGA-HD-8634-01A-11R-2403-07
TCGA-CN-6994-01A-11R-1915-07
TCGA-D6-A4Z9-01A-11R-A24Z-07
TCGA-CR-7376-01A-11R-2132-07
TCGA-CR-7391-01A-11R-2016-07
TCGA-T2-A6X2-01A-12R-A34R-07
TCGA-BA-4074-01A-01R-1436-07
TCGA-CR-7380-01A-11R-2016-07
TCGA-CN-4734-01A-01R-1436-07
TCGA-CV-6441-01A-11R-1686-07
TCGA-CV-A6JY-01A-11R-A31N-07
TCGA-D6-6825-01A-21R-1915-07
TCGA-CR-5247-01A-01R-2016-07
TCGA-CV-7410-01A-21R-2081-07
TCGA-CV-7091-01A-11R-2016-07
TCGA-BA-5153-01A-01R-1436-07
TCGA-CV-7428-01A-11R-2132-07
TCGA-CX-7086-01A-11R-2081-07
TCGA-CN-5364-01A-01R-1436-07
TCGA-BA-A6DB-01A-11R-A30B-07
TCGA-CQ-5325-01A-01R-1686-07
TCGA-CN-4731-01A-01R-1436-07
TCGA-CV-7427-01A-11R-2081-07
TCGA-CR-6467-01A-11R-1873-07
TCGA-T3-A92M-01A-31R-A39I-07
TCGA-MT-A67F-01A-11R-A30B-07
TCGA-CV-A45X-01A-21R-A24Z-07
TCGA-CN-A6UY-01A-12R-A34R-07
TCGA-CQ-6222-01A-11R-1915-07
TCGA-MZ-A7D7-01A-21R-A34R-07
TCGA-CQ-5329-01A-01R-1686-07
TCGA-CV-5973-01A-11R-1686-07
TCGA-BA-5555-01A-01R-1514-07
TCGA-CV-A6K2-01A-11R-A31N-07
TCGA-CN-A49A-01A-11R-A24H-07
TCGA-TN-A7HJ-01A-12R-A34R-07
TCGA-CN-4736-01A-01R-1436-07
TCGA-CN-4730-01A-01R-1436-07
TCGA-CV-7433-01A-11R-2132-07
TCGA-CV-6934-01A-11R-1915-07
TCGA-CV-6941-01A-11R-1915-07
TCGA-BB-A6UM-01A-12R-A34R-07
TCGA-C9-A47Z-01A-11R-A24H-07
TCGA-P3-A6T7-01A-11R-A34R-07
TCGA-D6-6515-01A-21R-1873-07
TCGA-CV-7180-01A-11R-2016-07
TCGA-CV-6951-01A-11R-1915-07
TCGA-F7-8298-01A-11R-2403-07
TCGA-CV-7100-01A-11R-2016-07
TCGA-TN-A7HL-01A-11R-A34R-07
TCGA-CV-7183-01A-11R-2016-07
TCGA-CV-A6JN-01A-11R-A31N-07
TCGA-DQ-5625-01A-01R-1873-07
TCGA-CN-4723-01A-01R-1436-07
TCGA-F7-A624-01A-22R-A30B-07
TCGA-CV-A463-01A-11R-A266-07
TCGA-BB-4228-01A-01R-1436-07
TCGA-CV-6953-01A-11R-1915-07
TCGA-CV-7261-01A-11R-2016-07
TCGA-P3-A5QF-01A-11R-A28V-07
TCGA-CR-6470-01A-11R-1873-07
TCGA-CV-5979-01A-11R-1686-07
TCGA-CV-6950-01A-11R-1915-07
TCGA-CR-6493-01A-11R-1873-07
TCGA-CV-A6JT-01A-11R-A31N-07
TCGA-T2-A6WZ-01A-21R-A34R-07
TCGA-CV-6436-01A-11R-1686-07
TCGA-UF-A7JA-01A-12R-A34R-07
TCGA-CQ-A4CB-01A-11R-A24Z-07
TCGA-CX-7219-01A-11R-2016-07
TCGA-IQ-A61G-01A-11R-A30B-07
TCGA-CV-5434-01A-01R-1686-07
TCGA-CR-7382-01A-11R-2132-07
TCGA-CQ-A4CI-01A-11R-A266-07
TCGA-BB-4224-01A-01R-1436-07
TCGA-CN-6997-01A-11R-2016-07
TCGA-CV-7101-01A-11R-2016-07
TCGA-CV-6937-01A-11R-2016-07
TCGA-CQ-5326-01A-01R-1873-07
TCGA-P3-A6SX-01A-11R-A34R-07
TCGA-D6-A6EQ-01A-11R-A31N-07
TCGA-CN-6995-01A-31R-2016-07
TCGA-CV-5971-01A-11R-1686-07
TCGA-CQ-6220-01A-11R-1915-07
TCGA-CV-A45Y-01A-11R-A24Z-07
TCGA-P3-A6T0-01A-12R-A34R-07
TCGA-CN-4740-01A-01R-1436-07
TCGA-CN-5370-01A-01R-2016-07
TCGA-CN-6024-01A-11R-1686-07
TCGA-CR-7397-01A-11R-2016-07
TCGA-QK-AA3J-01A-11R-A39I-07
TCGA-BA-A6DI-01A-11R-A30B-07
TCGA-CV-5443-01A-01R-1514-07
TCGA-P3-A5Q5-01A-11R-A28V-07
TCGA-CN-A498-01A-11R-A24H-07
TCGA-CX-7082-01A-11R-2016-07
TCGA-CV-7432-01A-11R-2132-07
TCGA-CV-7248-01A-11R-2016-07
TCGA-KU-A66T-01A-11R-A30B-07
TCGA-P3-A5Q6-01A-11R-A28V-07
TCGA-CN-5374-01A-01R-1436-07
TCGA-CV-A45O-01A-21R-A24H-07
TCGA-T3-A92N-01A-11R-A39I-07
TCGA-CV-7438-01A-21R-2132-07
TCGA-CV-A6K1-01A-11R-A31N-07
TCGA-BA-A4IH-01A-11R-A266-07
TCGA-H7-8502-01A-11R-2403-07
TCGA-CV-7406-01A-11R-2081-07
TCGA-CV-7414-01A-11R-2081-07
TCGA-HD-7229-01A-11R-2016-07
TCGA-CV-6961-01A-21R-1915-07
TCGA-TN-A7HI-01A-11R-A34R-07
TCGA-CQ-5333-01A-01R-2403-07
TCGA-CN-4733-01A-02R-1873-07
TCGA-CN-5363-01A-01R-1436-07
TCGA-CV-6956-01A-21R-2016-07
TCGA-CV-7263-01A-11R-2016-07
TCGA-CN-A49C-01A-11R-A24H-07
TCGA-CV-7097-01A-11R-2016-07
TCGA-IQ-A6SG-01A-12R-A34R-07
TCGA-UF-A7JC-01A-21R-A34R-07
TCGA-QK-A6II-01A-11R-A31N-07
TCGA-CN-A49B-01A-31R-A24H-07
TCGA-IQ-A61E-01A-22R-A30B-07
TCGA-QK-A8ZB-01A-11R-A39I-07
TCGA-CR-6481-01A-11R-1873-07
TCGA-BB-8596-01A-11R-2403-07
TCGA-RS-A6TP-01A-12R-A34R-07
TCGA-CV-5978-01A-11R-1686-07
TCGA-CV-5977-01A-11R-1686-07
TCGA-CV-A6JU-01A-11R-A31N-07
TCGA-CV-7102-01A-11R-2016-07
TCGA-CR-7368-01A-11R-2132-07
TCGA-D6-A74Q-01A-11R-A34R-07
TCGA-D6-6824-01A-11R-1915-07
TCGA-CV-7440-01A-11R-2132-07
TCGA-CR-6477-01A-11R-1873-07
TCGA-UF-A71B-01A-12R-A34R-07
TCGA-QK-A6IF-01A-11R-A31N-07
TCGA-CQ-6229-01A-11R-1915-07
TCGA-CN-A63U-01A-11R-A30B-07
TCGA-CV-6940-01A-11R-1915-07
TCGA-H7-8501-01A-11R-2403-07
TCGA-BA-A4IF-01A-11R-A266-07
TCGA-CV-5442-01A-01R-1514-07
TCGA-CR-7392-01A-11R-2016-07
TCGA-UF-A71A-01A-22R-A34R-07
TCGA-CN-A642-01A-12R-A30B-07
TCGA-CV-A45U-01A-12R-A24H-07
TCGA-CN-6012-01A-11R-1686-07
TCGA-CV-A45W-01A-11R-A24Z-07
TCGA-CV-A6K0-01B-21R-A31N-07
TCGA-CN-6022-01A-21R-1686-07
TCGA-CN-A6V3-01A-12R-A34R-07
TCGA-IQ-A61J-01A-11R-A30B-07
TCGA-BA-7269-01A-11R-2016-07
TCGA-CV-7178-01A-21R-2016-07
TCGA-BB-A6UO-01A-12R-A34R-07
TCGA-CV-A468-01A-11R-A266-07
TCGA-CV-6960-01A-41R-2016-07
TCGA-CV-7252-01A-11R-2016-07
TCGA-CV-7422-01A-21R-2081-07
TCGA-CX-A4AQ-01A-11R-A24Z-07
TCGA-CQ-5330-01A-01R-1686-07
TCGA-P3-A6T3-01A-11R-A34R-07
TCGA-HD-A6I0-01A-11R-A31N-07
TCGA-CQ-A4CE-01A-11R-A266-07
TCGA-CV-A460-01A-21R-A24Z-07
TCGA-CV-7104-01A-11R-2016-07
TCGA-UF-A7JF-01A-11R-A34R-07
TCGA-HD-7753-01A-11R-2081-07
TCGA-F7-A61S-01A-11R-A28V-07
TCGA-CQ-A4C9-01A-11R-A24Z-07
TCGA-CQ-A4CA-01A-11R-A24Z-07
TCGA-IQ-A61O-01A-11R-A30B-07
TCGA-CQ-A4CD-01A-21R-A24Z-07
TCGA-CN-A499-01A-11R-A24H-07
TCGA-CN-6013-01A-11R-1686-07
TCGA-CN-6998-01A-23R-2016-07
TCGA-MZ-A6I9-01A-11R-A31N-07
TCGA-QK-A6VB-01A-12R-A34R-07
TCGA-CV-6959-01A-11R-1915-07
TCGA-HD-7832-01A-11R-2132-07
TCGA-CN-A63V-01A-11R-A466-07
TCGA-CV-7415-01A-11R-2081-07
TCGA-CV-6003-01A-11R-1686-07
TCGA-CN-6016-01A-11R-1686-07
TCGA-H7-A6C4-01A-11R-A30B-07
TCGA-CV-5966-01A-11R-1686-07
TCGA-BA-4076-01A-01R-1436-07
TCGA-CN-4735-01A-01R-1436-07
TCGA-CV-6955-01A-11R-2016-07
TCGA-CR-6491-01A-11R-1873-07
TCGA-BA-5558-01A-01R-1514-07
TCGA-CN-4728-01A-01R-1436-07
TCGA-BB-A5HZ-01A-21R-A28V-07
TCGA-UP-A6WW-01A-12R-A34R-07
TCGA-CV-7407-01A-11R-2081-07
TCGA-CV-7416-01A-11R-2081-07
TCGA-CN-5361-01A-01R-1436-07
TCGA-UF-A71D-01A-12R-A34R-07
TCGA-CV-A464-01A-11R-A266-07
TCGA-CV-A6JD-01A-11R-A31N-07
TCGA-CQ-7071-01A-12R-A30B-07
TCGA-UF-A7J9-01A-12R-A34R-07
TCGA-CQ-6225-01A-11R-1915-07
TCGA-MT-A51X-01A-11R-A266-07
TCGA-CR-6488-01A-12R-2081-07
TCGA-DQ-7588-01A-11R-2081-07
TCGA-BA-6873-01A-11R-1873-07
TCGA-CQ-A4CH-01A-11R-A266-07
TCGA-CN-6020-01A-11R-1686-07
TCGA-HD-7831-01A-11R-2132-07
TCGA-CR-7364-01A-11R-2016-07
TCGA-CN-A63W-01A-11R-A30B-07
TCGA-D6-A6EK-01A-11R-A31N-07
TCGA-BA-5557-01A-01R-1514-07
TCGA-BA-6869-01A-11R-1873-07
TCGA-CR-7385-01A-11R-2016-07
TCGA-CR-6472-01A-11R-1873-07
TCGA-UF-A7JH-01A-21R-A34R-07
TCGA-BA-4077-01B-01R-1436-07
TCGA-CV-7411-01A-11R-2081-07
TCGA-MT-A67A-01A-11R-A30B-07
TCGA-D6-6826-01A-11R-1915-07
TCGA-CR-7404-01A-11R-2132-07
TCGA-D6-A6EM-01A-21R-A31N-07
TCGA-BA-6871-01A-11R-1873-07
TCGA-CR-7371-01A-11R-2016-07
TCGA-CV-5432-01A-02R-1686-07
TCGA-CN-5360-01A-01R-1436-07
TCGA-CQ-A4C6-01A-11R-A24Z-07
TCGA-MT-A7BN-01A-12R-A34R-07
TCGA-CN-A641-01A-11R-A30B-07
TCGA-DQ-5629-01A-01R-1873-07
TCGA-BA-A6DJ-01A-11R-A30B-07
TCGA-CV-6938-01A-11R-1915-07
TCGA-CR-7395-01A-11R-2016-07
TCGA-CV-7423-01A-11R-2081-07
TCGA-P3-A5QE-01A-11R-A28V-07
TCGA-QK-A8Z8-01A-11R-A39I-07
TCGA-CV-A465-01A-11R-A266-07
TCGA-QK-A8Z9-01B-11R-A39I-07
TCGA-IQ-7630-01A-11R-2081-07
TCGA-CN-4738-01A-02R-1514-07
TCGA-CQ-5331-01A-02R-1873-07
TCGA-CV-7418-01A-11R-2081-07
TCGA-H7-A76A-01A-51R-A34R-07
TCGA-D6-A6EP-01A-11R-A31N-07
TCGA-BA-A6DG-01A-21R-A30B-07
TCGA-UF-A7JT-01A-11R-A34R-07
TCGA-CN-A6V6-01A-12R-A34R-07
TCGA-CR-6473-01A-11R-1873-07
TCGA-CQ-7069-01A-11R-2403-07
TCGA-CQ-6219-01A-11R-1915-07
TCGA-IQ-A6SH-01A-12R-A34R-07
TCGA-IQ-7631-01A-11R-2081-07
TCGA-CR-7398-01A-11R-2016-07
TCGA-UF-A71E-01A-31R-A34R-07
TCGA-UF-A719-01A-12R-A34R-07
TCGA-CN-6023-01A-11R-1686-07
TCGA-D6-A6EO-01A-11R-A31N-07
TCGA-KU-A6H8-01A-21R-A34R-07
TCGA-CN-6010-01A-11R-1686-07
TCGA-BA-A8YP-01A-11R-A39I-07
TCGA-CV-6936-01A-11R-1915-07
TCGA-D6-A4ZB-01A-11R-A24Z-07
TCGA-QK-A6IG-01A-11R-A31N-07
TCGA-UF-A7JJ-01A-11R-A34R-07
TCGA-RS-A6TO-01A-32R-A34R-07
TCGA-CR-7372-01A-11R-2016-07
TCGA-D6-6827-01A-11R-1915-07
TCGA-CN-5366-01A-01R-1436-07
TCGA-CQ-6223-01A-11R-1915-07
TCGA-F7-7848-01A-11R-2132-07
TCGA-CV-A6JM-01A-11R-A31N-07
TCGA-CN-5359-01A-01R-1436-07
TCGA-P3-A5QA-01A-11R-A28V-07
TCGA-F7-A50I-01A-11R-A28V-07
TCGA-T2-A6WX-01A-12R-A34R-07
TCGA-CR-7402-01A-11R-2016-07
TCGA-CR-7389-01A-11R-2016-07
TCGA-BA-6868-01B-12R-1915-07
TCGA-QK-A6IH-01A-11R-A31N-07
TCGA-CN-6011-01A-11R-1686-07
TCGA-CR-6474-01A-11R-1873-07
TCGA-CV-6939-01A-11R-1915-07
TCGA-D6-8568-01A-11R-2403-07
TCGA-HD-A634-01A-11R-A28V-07
TCGA-CV-6948-01A-11R-1915-07
TCGA-QK-A64Z-01A-11R-A30B-07
TCGA-CQ-6228-01A-11R-1915-07
TCGA-QK-A8Z7-01A-11R-A39I-07
TCGA-CN-A497-01A-11R-A24H-07
TCGA-F7-A50G-01A-11R-A266-07
TCGA-IQ-A61I-01A-11R-A30B-07
TCGA-CR-7373-01A-11R-2016-07
TCGA-CN-A63T-01A-11R-A28V-07
TCGA-CN-6019-01A-11R-1686-07
TCGA-CR-7386-01A-11R-2016-07
TCGA-HD-A6HZ-01A-12R-A31N-07
TCGA-CN-4725-01A-01R-1436-07
TCGA-WA-A7H4-01A-21R-A34R-07
TCGA-CV-5441-01A-01R-1514-07
TCGA-CR-7367-01A-11R-2016-07
TCGA-CR-5249-01A-01R-1514-07
TCGA-F7-A620-01A-11R-A28V-07
TCGA-CV-7090-01A-11R-2016-07
TCGA-CV-7437-01A-21R-2132-07
TCGA-BA-5151-01A-01R-1436-07
TCGA-CV-A461-01A-41R-A266-07
TCGA-BA-5559-01A-01R-1514-07
TCGA-CV-7421-01A-11R-2081-07
TCGA-CN-4729-01A-01R-1436-07
TCGA-BB-4217-01A-11R-2081-07
TCGA-CR-5248-01A-01R-2016-07
TCGA-CR-7394-01A-11R-2016-07
TCGA-F7-A61V-01A-11R-A28V-07
TCGA-CN-5369-01A-01R-1436-07
TCGA-CN-6988-01A-11R-1915-07
TCGA-BA-A6DE-01A-22R-A31N-07
TCGA-D6-8569-01A-11R-2403-07
TCGA-CR-7401-01A-11R-2016-07
TCGA-CV-7177-01A-11R-2016-07
TCGA-CV-7238-01A-11R-2016-07
TCGA-CV-7247-01A-11R-2016-07
TCGA-CQ-7072-01A-21R-A30B-07
TCGA-CV-A45T-01A-11R-A24H-07
TCGA-KU-A6H7-01A-11R-A31N-07
TCGA-BA-4075-01A-01R-1436-07
TCGA-DQ-5624-01A-01R-1873-07
TCGA-BA-A6DD-01A-12R-A31N-07
TCGA-KU-A66S-01A-21R-A30B-07
TCGA-CV-7254-01A-11R-2016-07
TCGA-CV-5976-01A-11R-1686-07
TCGA-CR-7374-01A-11R-2016-07
TCGA-CR-5250-01A-01R-1514-07
TCGA-CV-A6JZ-01A-11R-A31N-07
TCGA-CV-6935-01A-11R-1915-07
TCGA-CV-6954-01A-11R-1915-07
TCGA-CV-5431-01A-01R-1514-07
TCGA-CQ-7065-01A-11R-2081-07
TCGA-UF-A7JD-01A-11R-A34R-07
TCGA-QK-A6IJ-01A-11R-A31N-07
TCGA-CV-7425-01A-11R-2081-07
TCGA-BB-A5HU-01A-11R-A28V-07
TCGA-CQ-5324-01A-01R-1686-07
TCGA-BB-A5HY-01A-11R-A28V-07
TCGA-CV-A45R-01A-11R-A24H-07
TCGA-P3-A6T4-01A-11R-A34R-07
TCGA-CV-6962-01A-11R-1915-07
TCGA-MT-A51W-01A-21R-A266-07
TCGA-CQ-7068-01A-11R-2081-07
TCGA-4P-AA8J-01A-11R-A39I-07
TCGA-CV-A45P-01A-11R-A24H-07
TCGA-CV-7429-01A-11R-2132-07
TCGA-HD-A633-01A-11R-A28V-07
TCGA-DQ-5631-01A-01R-1873-07
TCGA-CV-5436-01A-01R-1514-07
TCGA-DQ-5630-01A-01R-1873-07
TCGA-CR-6482-01A-11R-1873-07
TCGA-P3-A6T6-01A-11R-A34R-07
TCGA-DQ-7592-01A-11R-2081-07
TCGA-BA-A4II-01A-11R-A266-07
TCGA-HL-7533-01A-11R-2232-07
TCGA-CV-7255-01A-11R-2016-07
TCGA-CR-5243-01A-01R-1514-07
TCGA-P3-A6T5-01A-11R-A34R-07
TCGA-CV-6952-01A-11R-1915-07
TCGA-D6-A6ES-01A-12R-A31N-07
TCGA-CV-7435-01A-11R-2132-07
TCGA-CV-7446-01A-11R-2232-07
TCGA-BA-6870-01A-11R-1873-07
TCGA-MZ-A5BI-01A-31R-A34R-07
TCGA-CN-4741-01A-01R-1436-07
TCGA-CR-6471-01A-11R-1873-07
TCGA-CV-7430-01A-11R-2132-07
TCGA-CV-7099-01A-41R-2016-07
TCGA-CQ-6221-01A-11R-2081-07
TCGA-CN-6992-01A-11R-1915-07
TCGA-BA-5556-01A-01R-1514-07
TCGA-CV-7245-01A-11R-2016-07
TCGA-UF-A7JV-01A-11R-A34R-07
TCGA-CV-5440-01A-01R-1514-07
TCGA-UF-A7JO-01A-11R-A34R-07
TCGA-CR-7399-01A-11R-2016-07
TCGA-CQ-5334-01A-01R-1686-07
TCGA-CQ-5332-01A-01R-1686-07
TCGA-HD-8224-01A-11R-2403-07
TCGA-BB-8601-01A-11R-2403-07
TCGA-CN-5355-01A-01R-1436-07
TCGA-CN-4737-01A-01R-1436-07
TCGA-QK-A6V9-01A-11R-A34R-07
TCGA-DQ-7591-01A-11R-2081-07
TCGA-CN-5358-01A-01R-1514-07
TCGA-CV-6945-01A-11R-1915-07
TCGA-CQ-6218-01A-11R-1915-07
TCGA-CV-7413-01A-11R-2081-07
TCGA-CR-7377-01A-11R-2016-07
TCGA-D6-6823-01A-11R-1915-07
TCGA-CV-7253-01A-11R-2016-07
TCGA-CV-6942-01A-21R-2016-07
TCGA-BA-A6DA-01A-31R-A31N-07
TCGA-MT-A67D-01A-31R-A30B-07
TCGA-CQ-5323-01A-01R-1686-07
TCGA-CR-7390-01A-11R-2016-07
TCGA-UF-A7JK-01A-11R-A34R-07
TCGA-CR-6478-01A-11R-1873-07
TCGA-CN-6021-01A-11R-1686-07
TCGA-CQ-6224-01A-11R-1915-07
TCGA-HD-7754-01A-11R-2081-07
TCGA-F7-A622-01A-11R-A28V-07
TCGA-P3-A6T2-01A-11R-A34R-07
TCGA-CR-7383-01A-11R-2132-07
TCGA-D6-A6EN-01A-11R-A31N-07
TCGA-CQ-A4C7-01A-11R-A24Z-07
TCGA-CV-5435-01A-01R-1686-07
TCGA-CR-7370-01A-11R-2132-07
TCGA-CN-4722-01A-01R-1436-07
TCGA-F7-8489-01A-31R-2403-07
TCGA-D6-6516-01A-11R-1873-07
TCGA-CV-5444-01A-02R-1514-07
TCGA-CN-A6V7-01A-12R-A34R-07
TCGA-CV-A45Z-01A-21R-A24Z-07
TCGA-UF-A7JS-01A-11R-A34R-07
TCGA-CV-A45Q-01A-11R-A24H-07
TCGA-QK-A6VC-01A-23R-A34R-07
TCGA-BA-A6DL-01A-21R-A30B-07
TCGA-CR-7365-01A-11R-2016-07
TCGA-P3-A6SW-01A-11R-A34R-07
TCGA-HD-8314-01A-11R-2403-07
TCGA-CN-4742-01A-02R-1514-07
TCGA-IQ-A61H-01A-11R-A30B-07
TCGA-CX-7085-01A-21R-2016-07
TCGA-CV-7235-01A-11R-2016-07
TCGA-CV-7434-01A-11R-2132-07
TCGA-CR-6480-01A-11R-1873-07
TCGA-CV-7242-01A-11R-2016-07
TCGA-F7-A61W-01A-11R-A28V-07
TCGA-CV-5439-01A-01R-1686-07
TCGA-HD-A4C1-01A-11R-A24H-07
TCGA-D6-6517-01A-11R-1873-07
TCGA-CQ-6227-01A-11R-1915-07
TCGA-CV-7089-01A-11R-2016-07
TCGA-QK-AA3K-01A-11R-A39I-07
TCGA-CN-5367-01A-01R-1436-07
TCGA-WA-A7GZ-01A-11R-A34R-07
TCGA-CN-5365-01A-01R-1436-07
TCGA-CV-7095-01A-21R-2016-07
TCGA-QK-A8ZA-01A-11R-A39I-07
TCGA-CV-A6JE-01A-11R-A31N-07
TCGA-CQ-7063-01A-11R-2403-07
TCGA-BB-4227-01A-01R-1873-07
TCGA-CV-6433-01A-11R-1686-07
TCGA-CN-5373-01A-01R-1436-07
TCGA-CV-7103-01A-21R-2016-07
TCGA-CV-7568-01A-11R-2232-07
TCGA-CN-6989-01A-11R-1915-07
TCGA-CV-6943-01A-11R-1915-07
TCGA-CV-7424-01A-11R-2081-07
TCGA-BA-4078-01A-01R-1436-07
TCGA-CN-4739-01A-02R-1514-07
TCGA-CV-5430-01A-02R-1686-07
TCGA-BA-A6D8-01A-31R-A31N-07
TCGA-CR-7379-01A-11R-2016-07
TCGA-CV-7236-01A-11R-2016-07
TCGA-CN-4727-01A-01R-1436-07
TCGA-CQ-5327-01A-01R-1686-07
TCGA-C9-A480-01A-12R-A24H-07
TCGA-CV-A6JO-01B-11R-A34R-07
TCGA-CR-6492-01A-12R-2081-07
TCGA-CV-6933-01A-11R-1915-07
TCGA-BA-6872-01A-11R-1873-07
TCGA-BB-4223-01A-01R-1436-07
TCGA-CN-4726-01A-01R-1436-07
TCGA-BA-5152-01A-02R-1873-07
TCGA-BB-4225-01A-01R-1436-07
TCGA-BA-A4IG-01A-11R-A266-07
TCGA-CR-7393-01A-11R-2016-07
TCGA-T2-A6X0-01A-11R-A34R-07
TCGA-F7-A623-01A-11R-A28V-07
TCGA-IQ-7632-01A-11R-2081-07
TCGA-QK-A652-01A-11R-A30B-07
TCGA-CR-7388-01A-11R-2016-07
TCGA-UF-A718-01A-22R-A34R-07

## Sheet: LUAD
TCGA barcode
TCGA-55-6985-11A-01R-1949-07
TCGA-44-2668-11A-01R-1758-07
TCGA-91-6835-11A-01R-1858-07
TCGA-50-5932-11A-01R-1755-07
TCGA-91-6828-11A-01R-1858-07
TCGA-44-3398-11B-01R-1758-07
TCGA-91-6847-11A-01R-1949-07
TCGA-49-6743-11A-01R-1858-07
TCGA-38-4625-11A-01R-1758-07
TCGA-44-6778-11A-01R-1858-07
TCGA-44-6146-11A-01R-1858-07
TCGA-50-5939-11A-01R-1628-07
TCGA-44-6144-11A-01R-1755-07
TCGA-55-6979-11A-01R-1949-07
TCGA-73-4676-11A-01R-1755-07
TCGA-55-6982-11A-01R-1949-07
TCGA-55-6972-11A-01R-1949-07
TCGA-50-5930-11A-01R-1755-07
TCGA-55-6980-11A-01R-1949-07
TCGA-44-6145-11A-01R-1858-07
TCGA-55-6970-11A-01R-1949-07
TCGA-55-6968-11A-01R-1949-07
TCGA-49-4512-11A-01R-1858-07
TCGA-55-6983-11A-01R-1949-07
TCGA-44-3396-11A-01R-1758-07
TCGA-50-5931-11A-01R-1858-07
TCGA-44-2665-11A-01R-1758-07
TCGA-44-6776-11A-01R-1858-07
TCGA-44-6777-11A-01R-1858-07
TCGA-50-5936-11A-01R-1628-07
TCGA-49-6761-11A-01R-1949-07
TCGA-44-2657-11A-01R-1758-07
TCGA-44-2662-11A-01R-1758-07
TCGA-91-6849-11A-01R-1949-07
TCGA-50-6595-11A-01R-1858-07
TCGA-38-4627-11A-01R-1758-07
TCGA-44-2655-11A-01R-1758-07
TCGA-44-6147-11A-01R-1858-07
TCGA-38-4626-11A-01R-1758-07
TCGA-44-6148-11A-01R-1858-07
TCGA-91-6829-11A-01R-1858-07
TCGA-55-6986-11A-01R-1949-07
TCGA-55-6984-11A-01R-1949-07
TCGA-91-6836-11A-01R-1858-07
TCGA-50-5933-11A-01R-1755-07
TCGA-91-6831-11A-02R-1858-07
TCGA-49-4490-11A-01R-1858-07
TCGA-44-2661-11A-01R-1758-07
TCGA-38-4632-11A-01R-1755-07
TCGA-55-6971-11A-01R-1949-07
TCGA-49-6742-11A-01R-1858-07
TCGA-55-6978-11A-01R-1949-07
TCGA-55-6975-11A-01R-1949-07
TCGA-44-5645-11A-01R-1628-07
TCGA-55-6969-11A-01R-1949-07
TCGA-49-6745-11A-01R-1858-07
TCGA-49-6744-11A-01R-1858-07
TCGA-50-5935-11A-01R-1858-07
TCGA-55-6981-11A-01R-1949-07
TCGA-44-7660-01A-11R-2066-07
TCGA-78-8662-01A-11R-2403-07
TCGA-75-7027-01A-11R-1949-07
TCGA-97-A4M6-01A-11R-A24X-07
TCGA-MP-A4SV-01A-11R-A24X-07
TCGA-38-4627-01A-01R-1206-07
TCGA-93-A4JO-01A-21R-A24X-07
TCGA-05-4426-01A-01R-1206-07
TCGA-97-7937-01A-11R-2170-07
TCGA-75-6206-01A-11R-1755-07
TCGA-62-A472-01A-11R-A24H-07
TCGA-49-6743-01A-11R-1858-07
TCGA-50-6597-01A-11R-1858-07
TCGA-55-A490-01A-11R-A466-07
TCGA-99-8032-01A-11R-2241-07
TCGA-55-8299-01A-11R-2287-07
TCGA-64-1676-01A-01R-0946-07
TCGA-86-8279-01A-11R-2287-07
TCGA-97-A4M5-01A-11R-A24X-07
TCGA-78-7536-01A-11R-2066-07
TCGA-55-8208-01A-11R-2241-07
TCGA-95-7562-01A-11R-2241-07
TCGA-MP-A4TK-01A-11R-A24X-07
TCGA-49-6761-01A-31R-1949-07
TCGA-50-6593-01A-11R-1755-07
TCGA-55-7728-01A-11R-2187-07
TCGA-86-8055-01A-11R-2241-07
TCGA-73-4668-01A-01R-1206-07
TCGA-55-8090-01A-11R-2241-07
TCGA-38-7271-01A-11R-2039-07
TCGA-55-8514-01A-11R-2403-07
TCGA-50-5932-01A-11R-1755-07
TCGA-95-A4VN-01A-11R-A262-07
TCGA-86-7954-01A-11R-2187-07
TCGA-91-A4BC-01A-11R-A24H-07
TCGA-MP-A4TJ-01A-51R-A262-07
TCGA-75-5126-01A-01R-1755-07
TCGA-44-6146-01A-11R-A278-07
TCGA-75-6211-01A-11R-1755-07
TCGA-62-A470-01A-11R-A24H-07
TCGA-73-4677-01A-01R-1206-07
TCGA-55-7911-01A-11R-2170-07
TCGA-50-8460-01A-11R-2326-07
TCGA-55-6981-01A-11R-1949-07
TCGA-44-8120-01A-11R-2241-07
TCGA-55-8614-01A-11R-2403-07
TCGA-64-1677-01A-01R-0946-07
TCGA-97-8552-01A-11R-2403-07
TCGA-69-8253-01A-11R-2287-07
TCGA-86-8668-01A-11R-2403-07
TCGA-86-8074-01A-11R-2241-07
TCGA-69-7765-01A-11R-2170-07
TCGA-55-8092-01A-11R-2241-07
TCGA-NJ-A4YQ-01A-11R-A262-07
TCGA-55-6983-01A-11R-1949-07
TCGA-62-8394-01A-11R-2326-07
TCGA-44-2661-01A-01R-1107-07
TCGA-44-7659-01A-11R-2066-07
TCGA-55-6712-01A-11R-1858-07
TCGA-05-4403-01A-01R-1206-07
TCGA-97-7553-01A-21R-2039-07
TCGA-78-8655-01A-11R-2403-07
TCGA-55-7724-01A-11R-2170-07
TCGA-73-4659-01A-01R-1206-07
TCGA-50-6673-01A-11R-1949-07
TCGA-78-7542-01A-21R-2066-07
TCGA-38-4625-01A-01R-1206-07
TCGA-55-7570-01A-11R-2039-07
TCGA-69-7979-01A-11R-2187-07
TCGA-55-A4DF-01A-11R-A24H-07
TCGA-67-3773-01A-01R-0946-07
TCGA-55-7573-01A-11R-2039-07
TCGA-50-5068-01A-01R-1628-07
TCGA-49-AARN-01A-21R-A41B-07
TCGA-78-7150-01A-21R-2039-07
TCGA-MP-A4TA-01A-21R-A24X-07
TCGA-55-7907-01A-11R-2170-07
TCGA-55-5899-01A-11R-1628-07
TCGA-55-7574-01A-11R-2039-07
TCGA-86-8073-01A-11R-2241-07
TCGA-L9-A7SV-01A-11R-A39D-07
TCGA-93-A4JP-01A-11R-A24X-07
TCGA-78-7163-01A-12R-2066-07
TCGA-64-1678-01A-01R-0946-07
TCGA-NJ-A55R-01A-11R-A262-07
TCGA-97-A4M7-01A-11R-A24X-07
TCGA-38-A44F-01A-11R-A24H-07
TCGA-62-8399-01A-21R-2326-07
TCGA-49-4514-01A-21R-1858-07
TCGA-44-6775-01A-11R-A278-07
TCGA-44-5643-01A-01R-1628-07
TCGA-44-6147-01A-11R-A278-07
TCGA-J2-A4AE-01A-21R-A24H-07
TCGA-44-2657-01A-01R-1107-07
TCGA-78-7158-01A-11R-2039-07
TCGA-93-7347-01A-11R-2187-07
TCGA-38-4630-01A-01R-1206-07
TCGA-86-7953-01A-11R-2187-07
TCGA-50-5072-01A-21R-1858-07
TCGA-62-A46S-01A-11R-A24H-07
TCGA-53-A4EZ-01A-12R-A24X-07
TCGA-69-7973-01A-11R-2187-07
TCGA-44-6775-01C-02R-A277-07
TCGA-55-8204-01A-11R-2241-07
TCGA-35-5375-01A-01R-1628-07
TCGA-78-7539-01A-11R-2066-07
TCGA-95-A4VK-01A-11R-A262-07
TCGA-50-5055-01A-01R-1628-07
TCGA-44-7667-01A-31R-2066-07
TCGA-MP-A4TI-01A-21R-A24X-07
TCGA-55-6979-01A-11R-1949-07
TCGA-55-7284-01B-11R-2241-07
TCGA-44-2656-01A-02R-A278-07
TCGA-44-6778-01A-11R-1858-07
TCGA-35-4123-01A-01R-1107-07
TCGA-44-6776-01A-11R-1858-07
TCGA-44-2656-01A-02R-0946-07
TCGA-44-2656-01B-06R-A277-07
TCGA-73-4676-01A-01R-1755-07
TCGA-86-8673-01A-11R-2403-07
TCGA-62-8395-01A-11R-2326-07
TCGA-44-A4SS-01A-11R-A24X-07
TCGA-86-8358-01A-11R-2326-07
TCGA-55-6968-01A-11R-1949-07
TCGA-99-AA5R-01A-11R-A39D-07
TCGA-55-8085-01A-11R-2241-07
TCGA-44-8117-01A-11R-2241-07
TCGA-55-8506-01A-11R-2403-07
TCGA-NJ-A7XG-01A-12R-A39D-07
TCGA-05-4384-01A-01R-1755-07
TCGA-64-1679-01A-21R-2066-07
TCGA-73-4666-01A-01R-1206-07
TCGA-55-8616-01A-11R-2403-07
TCGA-38-6178-01A-11R-1755-07
TCGA-93-7348-01A-21R-2039-07
TCGA-55-1594-01A-01R-0946-07
TCGA-73-4658-01A-01R-1755-07
TCGA-80-5607-01A-31R-1949-07
TCGA-55-8505-01A-11R-2403-07
TCGA-MP-A4T4-01A-11R-A262-07
TCGA-49-4506-01A-01R-1206-07
TCGA-97-8172-01A-11R-2287-07
TCGA-O1-A52J-01A-11R-A262-07
TCGA-78-7537-01A-11R-2066-07
TCGA-73-4662-01A-01R-1206-07
TCGA-62-8398-01A-11R-2326-07
TCGA-49-AAQV-01A-11R-A39D-07
TCGA-55-8621-01A-11R-2403-07
TCGA-53-7626-01A-12R-2066-07
TCGA-44-7669-01A-21R-2066-07
TCGA-93-8067-01A-11R-2287-07
TCGA-97-A4M2-01A-12R-A24X-07
TCGA-05-4425-01A-01R-1755-07
TCGA-69-7763-01A-11R-2170-07
TCGA-86-8056-01A-11R-2241-07
TCGA-44-2662-01A-01R-0946-07
TCGA-50-5931-01A-11R-1755-07
TCGA-55-8512-01A-11R-2403-07
TCGA-75-7025-01A-12R-1949-07
TCGA-50-5930-01A-11R-1755-07
TCGA-75-6214-01A-41R-1949-07
TCGA-L9-A743-01A-43R-A39D-07
TCGA-50-5939-01A-11R-1628-07
TCGA-78-7161-01A-11R-2039-07
TCGA-44-5645-01A-01R-1628-07
TCGA-44-3398-01A-01R-1107-07
TCGA-97-8547-01A-11R-2403-07
TCGA-91-6847-01A-11R-1949-07
TCGA-55-8511-01A-11R-2403-07
TCGA-50-5944-01A-11R-1755-07
TCGA-55-1592-01A-01R-0946-07
TCGA-50-8457-01A-11R-2326-07
TCGA-78-7159-01A-11R-2039-07
TCGA-67-6215-01A-11R-1755-07
TCGA-MP-A4T9-01A-11R-A24X-07
TCGA-97-7938-01A-11R-2170-07
TCGA-05-5425-01A-02R-1628-07
TCGA-55-7913-01B-11R-2241-07
TCGA-05-4417-01A-22R-1858-07
TCGA-75-6203-01A-11R-1755-07
TCGA-05-4434-01A-01R-1206-07
TCGA-55-8096-01A-11R-2241-07
TCGA-49-6767-01A-11R-1858-07
TCGA-44-2666-01A-01R-A278-07
TCGA-MP-A4T6-01A-32R-A262-07
TCGA-MP-A4TE-01A-22R-A466-07
TCGA-99-7458-01A-11R-2039-07
TCGA-91-6840-01A-11R-1949-07
TCGA-55-6986-01A-11R-1949-07
TCGA-05-4395-01A-01R-1206-07
TCGA-44-7672-01A-11R-2066-07
TCGA-44-2662-01B-02R-A277-07
TCGA-97-8175-01A-11R-2287-07
TCGA-55-8087-01A-11R-2241-07
TCGA-78-7160-01A-11R-2039-07
TCGA-L4-A4E5-01A-11R-A24X-07
TCGA-97-A4LX-01A-11R-A24X-07
TCGA-86-8359-01A-11R-2326-07
TCGA-44-6145-01A-11R-1755-07
TCGA-78-7155-01A-11R-2039-07
TCGA-55-7816-01A-11R-2170-07
TCGA-99-8025-01A-11R-2241-07
TCGA-44-A47G-01A-21R-A24H-07
TCGA-55-8615-01A-11R-2403-07
TCGA-73-7499-01A-11R-2187-07
TCGA-86-7711-01A-11R-2066-07
TCGA-86-8075-01A-11R-2241-07
TCGA-86-7955-01A-11R-2187-07
TCGA-05-4415-01A-22R-1858-07
TCGA-91-6830-01A-11R-1949-07
TCGA-49-6745-01A-11R-1858-07
TCGA-86-A4P7-01A-11R-A24X-07
TCGA-44-4112-01B-06R-A277-07
TCGA-55-6975-01A-11R-1949-07
TCGA-95-7039-01A-11R-1949-07
TCGA-44-6147-01B-06R-A277-07
TCGA-05-4432-01A-01R-1206-07
TCGA-49-4487-01A-21R-1858-07
TCGA-55-7727-01A-11R-2170-07
TCGA-73-A9RS-01A-11R-A41B-07
TCGA-44-5644-01A-21R-2039-07
TCGA-55-7914-01A-11R-2170-07
TCGA-62-A46R-01A-11R-A24H-07
TCGA-49-AARQ-01A-11R-A41B-07
TCGA-75-6207-01A-11R-1755-07
TCGA-53-7813-01A-11R-2170-07
TCGA-44-3918-01B-02R-A277-07
TCGA-64-1681-01A-11R-2066-07
TCGA-05-4410-01A-21R-1858-07
TCGA-55-8620-01A-11R-2403-07
TCGA-64-5774-01A-01R-1628-07
TCGA-97-A4M1-01A-11R-A24X-07
TCGA-83-5908-01A-21R-2287-07
TCGA-97-8179-01A-11R-2287-07
TCGA-64-1680-01A-02R-0946-07
TCGA-73-4670-01A-01R-1206-07
TCGA-44-3396-01A-01R-1206-07
TCGA-80-5611-01A-01R-1628-07
TCGA-53-7624-01A-11R-2066-07
TCGA-91-6835-01A-11R-1858-07
TCGA-L9-A50W-01A-12R-A39D-07
TCGA-86-7713-01A-11R-2066-07
TCGA-50-5044-01A-21R-1858-07
TCGA-50-6595-01A-12R-1858-07
TCGA-55-7903-01A-11R-2170-07
TCGA-55-8508-01A-11R-2403-07
TCGA-67-3771-01A-01R-0946-07
TCGA-55-A4DG-01A-11R-A24H-07
TCGA-91-7771-01A-11R-2170-07
TCGA-91-6849-01A-11R-1949-07
TCGA-64-5781-01A-01R-1628-07
TCGA-44-6146-01B-04R-A277-07
TCGA-97-7552-01A-11R-2039-07
TCGA-80-5608-01A-31R-1949-07
TCGA-91-6829-01A-21R-1858-07
TCGA-49-AARE-01A-11R-A41B-07
TCGA-97-7941-01A-11R-2187-07
TCGA-86-7714-01A-12R-2170-07
TCGA-62-8402-01A-11R-2326-07
TCGA-78-7162-01A-21R-2066-07
TCGA-49-AAR0-01A-21R-A39D-07
TCGA-35-4122-01A-01R-1107-07
TCGA-55-7726-01A-11R-2170-07
TCGA-62-A46Y-01A-11R-A24H-07
TCGA-55-6980-01A-11R-1949-07
TCGA-05-4430-01A-02R-1206-07
TCGA-67-3772-01A-01R-0946-07
TCGA-MP-A4SY-01A-21R-A24X-07
TCGA-78-7148-01A-11R-2039-07
TCGA-35-3615-01A-01R-0946-07
TCGA-44-3918-01A-01R-A278-07
TCGA-55-A493-01A-11R-A24H-07
TCGA-49-6744-01A-11R-1858-07
TCGA-49-4494-01A-01R-1206-07
TCGA-78-7143-01A-11R-2039-07
TCGA-55-8513-01A-11R-2403-07
TCGA-MP-A4TC-01A-11R-A24X-07
TCGA-05-4420-01A-01R-1206-07
TCGA-97-8174-01A-11R-2287-07
TCGA-44-6777-01A-11R-1858-07
TCGA-62-A46P-01A-11R-A24H-07
TCGA-55-8089-01A-11R-2241-07
TCGA-MN-A4N5-01A-11R-A24X-07
TCGA-49-AAR9-01A-21R-A41B-07
TCGA-86-8671-01A-11R-2403-07
TCGA-44-5645-01A-01R-A278-07
TCGA-49-4507-01A-01R-1206-07
TCGA-62-A46V-01A-11R-A24H-07
TCGA-05-4389-01A-01R-1206-07
TCGA-44-3918-01A-01R-1107-07
TCGA-50-6592-01A-11R-1755-07
TCGA-91-6831-01A-11R-1858-07
TCGA-55-6987-01A-11R-1949-07
TCGA-49-4510-01A-01R-1206-07
TCGA-86-8672-01A-21R-2403-07
TCGA-44-2668-01B-02R-A277-07
TCGA-93-A4JQ-01A-11R-A24X-07
TCGA-97-8177-01A-11R-2287-07
TCGA-05-4396-01A-21R-1858-07
TCGA-55-6978-01A-11R-1949-07
TCGA-69-8453-01A-12R-2326-07
TCGA-50-7109-01A-11R-2039-07
TCGA-49-4501-01A-01R-1206-07
TCGA-50-5049-01A-01R-1628-07
TCGA-78-8660-01A-11R-2403-07
TCGA-91-6828-01A-11R-1858-07
TCGA-50-6590-01A-12R-1858-07
TCGA-97-8176-01A-11R-2403-07
TCGA-50-5935-01A-11R-1755-07
TCGA-55-7281-01A-11R-2039-07
TCGA-49-4488-01A-01R-1755-07
TCGA-NJ-A55A-01A-11R-A262-07
TCGA-95-8494-01A-11R-2326-07
TCGA-64-5775-01A-01R-1628-07
TCGA-97-7547-01A-11R-2039-07
TCGA-75-7031-01A-11R-1949-07
TCGA-44-2655-01A-01R-0946-07
TCGA-75-6212-01A-11R-1755-07
TCGA-44-6147-01A-11R-1755-07
TCGA-05-4390-01A-02R-1755-07
TCGA-86-8674-01A-21R-2403-07
TCGA-49-6742-01A-11R-1858-07
TCGA-44-A47B-01A-11R-A24H-07
TCGA-MP-A4SW-01A-21R-A24X-07
TCGA-64-5815-01A-01R-1628-07
TCGA-MP-A4T8-01A-11R-A24X-07
TCGA-NJ-A4YI-01A-11R-A262-07
TCGA-L4-A4E6-01A-11R-A24H-07
TCGA-49-AAR4-01A-12R-A41B-07
TCGA-97-A4M3-01A-11R-A24X-07
TCGA-05-4397-01A-01R-1206-07
TCGA-55-6984-01A-11R-1949-07
TCGA-05-4427-01A-21R-1858-07
TCGA-86-8281-01A-11R-2287-07
TCGA-44-A4SU-01A-11R-A24X-07
TCGA-75-5147-01A-01R-1628-07
TCGA-97-7546-01A-11R-2039-07
TCGA-86-8585-01A-11R-2403-07
TCGA-55-8301-01A-11R-2287-07
TCGA-86-6562-01A-11R-1755-07
TCGA-J2-A4AD-01A-11R-A24H-07
TCGA-50-5946-01A-11R-1755-07
TCGA-55-8510-01A-11R-2403-07
TCGA-99-8033-01A-11R-2241-07
TCGA-44-2668-01A-01R-A278-07
TCGA-69-7978-01A-11R-2187-07
TCGA-86-8054-01A-11R-2241-07
TCGA-55-8302-01A-11R-2326-07
TCGA-05-4405-01A-21R-1858-07
TCGA-78-7147-01A-11R-2039-07
TCGA-MP-A4TD-01A-32R-A262-07
TCGA-44-2668-01A-01R-0946-07
TCGA-55-6971-01A-11R-1949-07
TCGA-50-6591-01A-11R-1755-07
TCGA-95-7944-01A-11R-2187-07
TCGA-NJ-A4YF-01A-12R-A262-07
TCGA-55-A48Z-01A-12R-A24X-07
TCGA-44-5645-01B-04R-A277-07
TCGA-05-5428-01A-01R-1628-07
TCGA-69-8255-01A-11R-2287-07
TCGA-75-5125-01A-01R-1755-07
TCGA-55-8097-01A-11R-2241-07
TCGA-86-A4D0-01A-11R-A24H-07
TCGA-L9-A444-01A-21R-A24H-07
TCGA-MP-A4T7-01A-11R-A24X-07
TCGA-91-A4BD-01A-11R-A24H-07
TCGA-05-4250-01A-01R-1107-07
TCGA-55-7994-01A-11R-2187-07
TCGA-99-8028-01A-11R-2241-07
TCGA-97-8171-01A-11R-2287-07
TCGA-67-6216-01A-11R-1755-07
TCGA-91-6848-01A-11R-1949-07
TCGA-44-2665-01A-01R-0946-07
TCGA-86-7701-01A-11R-2170-07
TCGA-78-7156-01A-11R-2039-07
TCGA-05-5420-01A-01R-1628-07
TCGA-55-6642-01A-11R-1858-07
TCGA-78-7149-01A-11R-2039-07
TCGA-05-4418-01A-01R-1206-07
TCGA-05-4422-01A-01R-1206-07
TCGA-78-7146-01A-11R-2039-07
TCGA-86-A4P8-01A-11R-A24X-07
TCGA-67-6217-01A-11R-1755-07
TCGA-78-8640-01A-11R-2403-07
TCGA-44-7670-01A-11R-2066-07
TCGA-49-AARO-01A-12R-A41B-07
TCGA-75-7030-01A-11R-1949-07
TCGA-50-5941-01A-11R-1755-07
TCGA-49-AARR-01A-11R-A41B-07
TCGA-J2-8192-01A-11R-2241-07
TCGA-64-5779-01A-01R-1628-07
TCGA-62-A46O-01A-11R-A24H-07
TCGA-50-8459-01A-11R-2326-07
TCGA-86-A4JF-01A-11R-A24X-07
TCGA-05-4249-01A-01R-1107-07
TCGA-J2-A4AG-01A-11R-A24H-07
TCGA-86-8280-01A-11R-2287-07
TCGA-78-7166-01A-12R-2066-07
TCGA-91-8499-01A-11R-2403-07
TCGA-71-6725-01A-11R-1858-07
TCGA-69-7980-01A-11R-2187-07
TCGA-L9-A8F4-01A-11R-A39D-07
TCGA-05-4433-01A-22R-1858-07
TCGA-55-A492-01A-11R-A24H-07
TCGA-73-4675-01A-01R-1206-07
TCGA-50-5936-01A-11R-1628-07
TCGA-44-7662-01A-11R-2066-07
TCGA-78-7154-01A-11R-2039-07
TCGA-05-4244-01A-01R-1107-07
TCGA-73-7498-01A-12R-2187-07
TCGA-50-5933-01A-11R-1755-07
TCGA-55-8507-01A-11R-2403-07
TCGA-S2-AA1A-01A-12R-A39D-07
TCGA-95-7948-01A-11R-2187-07
TCGA-67-3774-01A-01R-0946-07
TCGA-38-4628-01A-01R-1206-07
TCGA-50-5051-01A-21R-1858-07
TCGA-86-6851-01A-11R-1949-07
TCGA-75-6205-01A-11R-1755-07
TCGA-44-6148-01A-11R-1755-07
TCGA-MN-A4N1-01A-11R-A24X-07
TCGA-05-5429-01A-01R-1628-07
TCGA-55-8091-01A-11R-2241-07
TCGA-44-4112-01A-01R-1107-07
TCGA-44-3917-01A-01R-A278-07
TCGA-49-4505-01A-01R-1206-07
TCGA-62-8397-01A-11R-2326-07
TCGA-50-5942-01A-21R-1755-07
TCGA-55-8206-01A-11R-2241-07
TCGA-55-8094-01A-11R-2241-07
TCGA-05-4382-01A-01R-1206-07
TCGA-05-5423-01A-01R-1628-07
TCGA-75-5146-01A-01R-1628-07
TCGA-78-7167-01A-11R-2066-07
TCGA-J2-8194-01A-11R-2241-07
TCGA-97-A4M0-01A-11R-A24X-07
TCGA-38-4632-01A-01R-1755-07
TCGA-44-7661-01A-11R-2066-07
TCGA-55-8205-01A-11R-2241-07
TCGA-05-4424-01A-22R-1858-07
TCGA-44-2666-01A-01R-0946-07
TCGA-44-6775-01A-11R-1858-07
TCGA-38-4631-01A-01R-1755-07
TCGA-55-7283-01A-11R-2039-07
TCGA-95-7567-01A-11R-2066-07
TCGA-38-4629-01A-02R-1206-07
TCGA-91-8497-01A-11R-2403-07
TCGA-78-7540-01A-11R-2066-07
TCGA-55-A48Y-01A-11R-A24H-07
TCGA-55-7995-01A-11R-2187-07
TCGA-44-3919-01A-02R-1107-07
TCGA-69-7764-01A-11R-2170-07
TCGA-95-7947-01A-11R-2187-07
TCGA-MP-A4TH-01A-31R-A262-07
TCGA-55-7725-01A-11R-2170-07
TCGA-L9-A5IP-01A-21R-A39D-07
TCGA-97-7554-01A-11R-2039-07
TCGA-55-8619-01A-11R-2403-07
TCGA-55-7227-01A-11R-2039-07
TCGA-67-3770-01A-01R-0946-07
TCGA-78-7145-01A-11R-2039-07
TCGA-49-AAR3-01A-11R-A41B-07
TCGA-44-A479-01A-31R-A24H-07
TCGA-4B-A93V-01A-11R-A39D-07
TCGA-78-7633-01A-11R-2066-07
TCGA-NJ-A4YP-01A-11R-A262-07
TCGA-38-4626-01A-01R-1206-07
TCGA-78-7535-01A-11R-2066-07
TCGA-55-6970-01A-11R-1949-07
TCGA-55-6543-01A-11R-1755-07
TCGA-05-4402-01A-01R-1206-07
TCGA-55-1596-01A-01R-0946-07
TCGA-49-4490-01A-21R-1858-07
TCGA-62-A471-01A-12R-A24H-07
TCGA-86-A456-01A-11R-A24H-07
TCGA-49-4512-01A-21R-1858-07
TCGA-75-5122-01A-01R-1755-07
TCGA-55-A48X-01A-11R-A24H-07
TCGA-86-8278-01A-11R-2287-07
TCGA-55-6982-01A-11R-1949-07
TCGA-50-5045-01A-01R-1628-07
TCGA-05-4398-01A-01R-1206-07
TCGA-78-7152-01A-11R-2039-07
TCGA-44-6146-01A-11R-1755-07
TCGA-MP-A4TF-01A-11R-A262-07
TCGA-67-4679-01B-01R-1755-07
TCGA-91-6836-01A-21R-1858-07
TCGA-78-8648-01A-11R-2403-07
TCGA-44-A47A-01A-21R-A24H-07
TCGA-55-A57B-01A-12R-A39D-07
TCGA-55-8207-01A-11R-2241-07
TCGA-55-7576-01A-11R-2066-07
TCGA-NJ-A55O-01A-11R-A262-07
TCGA-55-A494-01A-11R-A24X-07
TCGA-44-2662-01A-01R-A278-07
TCGA-95-7043-01A-11R-1949-07
TCGA-L9-A443-01A-12R-A24H-07
TCGA-69-7974-01A-11R-2187-07
TCGA-NJ-A4YG-01A-22R-A262-07
TCGA-69-7760-01A-11R-2170-07
TCGA-49-4486-01A-01R-1206-07
TCGA-93-A4JN-01A-11R-A24X-07
TCGA-44-7671-01A-11R-2066-07
TCGA-44-6774-01A-21R-1858-07
TCGA-50-5066-01A-01R-1628-07
TCGA-50-6594-01A-11R-1755-07
TCGA-44-8119-01A-11R-2241-07
TCGA-49-AAR2-01A-11R-A39D-07
TCGA-44-2666-01B-02R-A277-07
TCGA-44-6779-01A-11R-1858-07
TCGA-86-8669-01A-11R-2403-07
TCGA-05-5715-01A-01R-1628-07
TCGA-69-A59K-01A-11R-A262-07
TCGA-55-A491-01A-11R-A24H-07
TCGA-71-8520-01A-11R-2403-07
TCGA-91-8496-01A-11R-2403-07
TCGA-69-8254-01A-11R-2287-07
TCGA-95-A4VP-01A-21R-A262-07
TCGA-95-8039-01A-11R-2241-07
TCGA-86-8076-01A-31R-2241-07
TCGA-44-2659-01A-01R-0946-07
TCGA-55-8203-01A-11R-2241-07
TCGA-MP-A5C7-01A-11R-A262-07
TCGA-78-7220-01A-11R-2039-07
TCGA-44-3917-01B-02R-A277-07
TCGA-78-7153-01A-11R-2039-07
TCGA-55-7910-01A-11R-2170-07
TCGA-64-5778-01A-01R-1628-07
TCGA-55-7815-01A-11R-2170-07
TCGA-55-6985-01A-11R-1949-07
TCGA-69-7761-01A-11R-2170-07
TCGA-MN-A4N4-01A-12R-A24X-07
TCGA-55-6972-01A-11R-1949-07

## Sheet: LUSC
TCGA barcode
TCGA-43-7657-11A-01R-2125-07
TCGA-43-5670-11A-01R-2125-07
TCGA-90-6837-11A-01R-1949-07
TCGA-34-7107-11A-01R-1949-07
TCGA-43-6771-11A-01R-1820-07
TCGA-58-8386-11A-01R-2296-07
TCGA-56-8083-11A-01R-2247-07
TCGA-92-7340-11A-01R-2045-07
TCGA-56-7582-11A-01R-2045-07
TCGA-77-7142-11A-01R-2045-07
TCGA-22-5481-11A-01R-1949-07
TCGA-77-8007-11A-01R-2187-07
TCGA-90-7767-11A-01R-2125-07
TCGA-22-4593-11A-01R-1820-07
TCGA-43-6143-11A-01R-1820-07
TCGA-43-6773-11A-01R-1949-07
TCGA-77-7138-11A-01R-2045-07
TCGA-56-8309-11A-01R-2296-07
TCGA-56-7580-11A-01R-2045-07
TCGA-22-4609-11A-01R-2125-07
TCGA-39-5040-11A-01R-2125-07
TCGA-56-8623-11A-01R-A28V-07
TCGA-60-2709-11A-01R-1820-07
TCGA-56-7579-11A-01R-2045-07
TCGA-22-5491-11A-01R-1858-07
TCGA-56-7730-11A-01R-2125-07
TCGA-56-7731-11A-01R-2125-07
TCGA-33-4587-11A-01R-2125-07
TCGA-22-5482-11A-01R-1635-07
TCGA-85-7710-11A-01R-2125-07
TCGA-22-5472-11A-11R-1635-07
TCGA-43-6647-11A-01R-1820-07
TCGA-43-7658-11A-01R-2125-07
TCGA-22-5478-11A-11R-1635-07
TCGA-33-6737-11A-01R-1820-07
TCGA-77-7337-11A-01R-2045-07
TCGA-77-8008-11A-01R-2187-07
TCGA-34-8454-11A-01R-2326-07
TCGA-77-7335-11A-01R-2045-07
TCGA-51-4079-11A-01R-1758-07
TCGA-56-8082-11A-01R-2247-07
TCGA-56-7823-11A-01R-2247-07
TCGA-22-5471-11A-01R-1635-07
TCGA-51-4081-11A-01R-1758-07
TCGA-56-7222-11A-01R-2045-07
TCGA-56-8201-11A-01R-2247-07
TCGA-22-5483-11A-11R-1820-07
TCGA-22-5489-11A-01R-1635-07
TCGA-77-7338-11A-01R-2045-07
TCGA-94-7943-01A-11R-2187-07
TCGA-68-8251-01A-11R-2296-07
TCGA-33-A5GW-01A-11R-A27Q-07
TCGA-85-8070-01A-11R-2247-07
TCGA-85-8479-01A-11R-2326-07
TCGA-22-5482-01A-01R-1635-07
TCGA-21-1077-01A-01R-0692-07
TCGA-43-6773-01A-41R-1949-07
TCGA-34-8455-01A-11R-2326-07
TCGA-85-7950-01A-11R-2187-07
TCGA-60-2715-01A-01R-0851-07
TCGA-85-A5B5-01A-21R-A26W-07
TCGA-33-4583-01A-01R-1443-07
TCGA-60-2725-01A-01R-1201-07
TCGA-85-8072-01A-31R-2247-07
TCGA-22-4601-01A-01R-1443-07
TCGA-66-2781-01A-01R-0851-07
TCGA-22-0940-01A-01R-0692-07
TCGA-43-6143-01A-11R-1820-07
TCGA-39-5021-01A-01R-1443-07
TCGA-22-1012-01A-01R-0692-07
TCGA-33-AASL-01A-11R-A405-07
TCGA-33-4533-01A-01R-1201-07
TCGA-43-6647-01A-11R-1820-07
TCGA-77-6845-01A-11R-1949-07
TCGA-56-8504-01A-11R-2403-07
TCGA-56-8629-01A-11R-2403-07
TCGA-63-A5MY-01A-11R-A26W-07
TCGA-37-4130-01A-01R-1100-07
TCGA-22-1002-01A-01R-0692-07
TCGA-18-3410-01A-01R-0980-07
TCGA-39-5011-01A-01R-1443-07
TCGA-56-7580-01A-11R-2045-07
TCGA-98-8023-01A-11R-2247-07
TCGA-33-4586-01A-01R-1443-07
TCGA-58-8388-01A-11R-2326-07
TCGA-77-A5G3-01A-31R-A27Q-07
TCGA-85-8071-01A-11R-2247-07
TCGA-33-A4WN-01A-11R-A262-07
TCGA-77-7141-01A-11R-2045-07
TCGA-60-2716-01A-01R-0851-07
TCGA-85-7844-01A-11R-2125-07
TCGA-98-A53H-01A-12R-A262-07
TCGA-37-A5EM-01A-21R-A27Q-07
TCGA-63-A5MU-01A-11R-A26W-07
TCGA-39-5016-01A-01R-1443-07
TCGA-33-4582-01A-01R-1443-07
TCGA-85-8666-01A-11R-2403-07
TCGA-66-2791-01A-01R-0980-07
TCGA-6A-AB49-01A-12R-A405-07
TCGA-66-2782-01A-01R-0851-07
TCGA-39-5036-01A-01R-1443-07
TCGA-NK-A5CX-01A-11R-A26W-07
TCGA-77-8154-01A-11R-2247-07
TCGA-37-4132-01A-01R-1100-07
TCGA-98-8020-01A-11R-2247-07
TCGA-56-A5DS-01A-11R-A27Q-07
TCGA-60-2707-01A-01R-0851-07
TCGA-66-2734-01A-01R-0980-07
TCGA-66-2742-01A-01R-0980-07
TCGA-22-5481-01A-31R-1949-07
TCGA-21-5787-01A-01R-1635-07
TCGA-66-2783-01A-01R-1201-07
TCGA-92-8063-01A-11R-2247-07
TCGA-66-2757-01A-01R-0851-07
TCGA-39-5022-01A-21R-1820-07
TCGA-94-A5I6-01A-21R-A27Q-07
TCGA-85-7698-01A-11R-2125-07
TCGA-37-4141-01A-02R-1100-07
TCGA-66-2753-01A-01R-0980-07
TCGA-43-A474-01A-11R-A24H-07
TCGA-63-5128-01A-01R-1443-07
TCGA-56-8625-01A-11R-2403-07
TCGA-63-A5MB-01A-11R-A26W-07
TCGA-22-5471-01A-01R-1635-07
TCGA-56-A4BX-01A-11R-A24H-07
TCGA-63-7021-01A-11R-1949-07
TCGA-85-A511-01A-21R-A262-07
TCGA-66-2755-01A-01R-0851-07
TCGA-46-3769-01A-01R-0980-07
TCGA-21-1070-01A-01R-0692-07
TCGA-22-5477-01A-01R-1635-07
TCGA-18-3412-01A-01R-0980-07
TCGA-34-5929-01A-11R-1820-07
TCGA-NK-A5CT-01A-31R-A26W-07
TCGA-46-6025-01A-11R-1820-07
TCGA-NK-A7XE-01A-12R-A405-07
TCGA-33-AASI-01A-22R-A405-07
TCGA-56-A4ZJ-01A-11R-A262-07
TCGA-34-5239-01A-21R-1820-07
TCGA-66-2754-01A-01R-0980-07
TCGA-66-2756-01A-01R-0851-07
TCGA-58-8390-01A-11R-2326-07
TCGA-77-A5GB-01B-11R-A27Q-07
TCGA-O2-A52S-01A-11R-A262-07
TCGA-60-2713-01A-01R-0851-07
TCGA-37-A5EN-01A-21R-A26W-07
TCGA-56-8626-01A-11R-2403-07
TCGA-L3-A4E7-01A-11R-A24Z-07
TCGA-22-5472-01A-01R-1635-07
TCGA-63-A5MW-01A-11R-A26W-07
TCGA-63-A5M9-01A-11R-A26W-07
TCGA-60-2710-01A-01R-0851-07
TCGA-77-6843-01A-11R-1949-07
TCGA-21-5786-01A-01R-1635-07
TCGA-68-7755-01A-11R-2125-07
TCGA-85-A50Z-01A-21R-A262-07
TCGA-66-2737-01A-01R-0980-07
TCGA-NC-A5HK-01A-11R-A26W-07
TCGA-85-A4JC-01A-11R-A24Z-07
TCGA-58-A46J-01A-11R-A24H-07
TCGA-46-6026-01A-11R-1820-07
TCGA-46-3765-01A-01R-0980-07
TCGA-O2-A52V-01A-31R-A262-07
TCGA-92-7341-01A-31R-2045-07
TCGA-51-4080-01A-01R-1100-07
TCGA-21-1076-01A-01R-0692-07
TCGA-56-7730-01A-11R-2125-07
TCGA-NC-A5HO-01A-11R-A26W-07
TCGA-21-1079-01A-01R-0692-07
TCGA-21-1076-01A-02R-0692-07
TCGA-NC-A5HT-01A-11R-A26W-07
TCGA-56-6545-01A-11R-1820-07
TCGA-85-8582-01A-21R-2403-07
TCGA-66-2787-01A-01R-0980-07
TCGA-60-2698-01A-01R-0851-07
TCGA-O2-A5IB-01A-11R-A27Q-07
TCGA-22-1000-01A-01R-A32Z-07
TCGA-56-8083-01A-11R-2247-07
TCGA-66-2763-01A-01R-0851-07
TCGA-77-8153-01A-11R-2403-07
TCGA-21-1083-01A-01R-0692-07
TCGA-85-8049-01A-11R-2247-07
TCGA-34-8456-01A-21R-2326-07
TCGA-33-6737-01A-11R-1820-07
TCGA-77-8140-01A-11R-2247-07
TCGA-39-5028-01A-01R-1443-07
TCGA-34-5240-01A-01R-1443-07
TCGA-79-5596-01A-31R-1949-07
TCGA-56-8308-01A-11R-2296-07
TCGA-90-7964-01A-21R-2187-07
TCGA-18-3408-01A-01R-0980-07
TCGA-18-4721-01A-01R-1443-07
TCGA-22-5478-01A-01R-1635-07
TCGA-66-2773-01A-01R-1201-07
TCGA-22-5479-01A-31R-1949-07
TCGA-39-5019-01A-01R-1820-07
TCGA-NK-A5CR-01A-11R-A26W-07
TCGA-39-5040-01A-21R-2125-07
TCGA-77-A5G6-01A-11R-A27Q-07
TCGA-98-A539-01A-31R-A262-07
TCGA-85-6175-01A-11R-1820-07
TCGA-34-5927-01A-11R-1820-07
TCGA-85-8350-01A-11R-2296-07
TCGA-NC-A5HM-01A-12R-A26W-07
TCGA-22-4591-01A-01R-1201-07
TCGA-85-6561-01A-11R-1820-07
TCGA-98-A53B-01A-11R-A262-07
TCGA-39-5039-01A-01R-1443-07
TCGA-68-A59I-01A-11R-A262-07
TCGA-90-7766-01A-21R-2125-07
TCGA-66-2744-01A-01R-0980-07
TCGA-22-4594-01A-01R-1201-07
TCGA-77-A5GF-01A-21R-A27Q-07
TCGA-60-2711-01A-01R-0851-07
TCGA-33-4566-01A-01R-1443-07
TCGA-43-2576-01A-01R-A32Z-07
TCGA-37-4135-01A-01R-1100-07
TCGA-98-7454-01A-11R-2045-07
TCGA-92-8065-01A-11R-2247-07
TCGA-52-7812-01A-11R-2125-07
TCGA-63-A5MM-01A-11R-A26W-07
TCGA-56-A5DR-01A-11R-A27Q-07
TCGA-56-8082-01A-11R-2247-07
TCGA-98-A538-01A-11R-A262-07
TCGA-94-8490-01A-11R-2326-07
TCGA-52-7810-01A-11R-2125-07
TCGA-NC-A5HJ-01A-11R-A26W-07
TCGA-52-7809-01A-21R-2125-07
TCGA-NC-A5HN-01A-11R-A26W-07
TCGA-18-3414-01A-01R-0980-07
TCGA-96-A4JL-01A-11R-A24Z-07
TCGA-18-5595-01A-01R-1635-07
TCGA-77-7140-01A-41R-2045-07
TCGA-33-AASB-01A-11R-A405-07
TCGA-63-7022-01A-11R-1949-07
TCGA-56-8628-01A-11R-2403-07
TCGA-NK-A5D1-01A-11R-A26W-07
TCGA-NC-A5HH-01A-11R-A26W-07
TCGA-77-8133-01A-12R-2247-07
TCGA-34-8454-01A-11R-2326-07
TCGA-90-6837-01A-11R-1949-07
TCGA-70-6722-01A-11R-1820-07
TCGA-60-2712-01A-01R-0851-07
TCGA-66-2727-01A-01R-0980-07
TCGA-18-3409-01A-01R-0980-07
TCGA-77-8009-01A-11R-2187-07
TCGA-85-A50M-01A-21R-A262-07
TCGA-37-4129-01A-01R-1100-07
TCGA-46-3766-01A-01R-0980-07
TCGA-37-5819-01A-01R-1635-07
TCGA-60-2706-01A-01R-0851-07
TCGA-85-A4JB-01A-51R-A262-07
TCGA-77-8007-01A-11R-2187-07
TCGA-43-2581-01A-01R-0851-07
TCGA-56-8309-01A-11R-2296-07
TCGA-43-A475-01A-11R-A24H-07
TCGA-63-A5MV-01A-21R-A26W-07
TCGA-22-1016-01A-01R-0692-07
TCGA-85-8288-01A-11R-2296-07
TCGA-22-4613-01A-01R-1443-07
TCGA-56-A62T-01A-11R-A405-07
TCGA-18-3411-01A-01R-0980-07
TCGA-60-2721-01A-01R-0851-07
TCGA-66-2771-01A-01R-0980-07
TCGA-58-8387-01A-11R-2296-07
TCGA-77-8148-01A-11R-2247-07
TCGA-46-3768-01A-01R-0980-07
TCGA-85-A4QQ-01A-41R-A262-07
TCGA-43-7658-01A-11R-2125-07
TCGA-56-7823-01B-11R-2247-07
TCGA-77-8138-01A-11R-2247-07
TCGA-22-5489-01A-01R-1635-07
TCGA-56-7822-01A-11R-2125-07
TCGA-77-A5G8-01B-11R-A27Q-07
TCGA-18-5592-01A-01R-1635-07
TCGA-22-4595-01A-01R-1201-07
TCGA-37-3783-01A-01R-1201-07
TCGA-77-7139-01A-11R-2045-07
TCGA-98-A53D-01A-32R-A262-07
TCGA-66-2758-01A-02R-0851-07
TCGA-33-6738-01A-11R-1949-07
TCGA-98-8021-01A-11R-2247-07
TCGA-56-1622-01A-01R-0692-07
TCGA-90-7769-01A-11R-2125-07
TCGA-85-8664-01A-11R-2403-07
TCGA-77-8008-01A-21R-2187-07
TCGA-58-8386-01A-11R-2296-07
TCGA-63-5131-01A-01R-1443-07
TCGA-77-6844-01A-11R-1949-07
TCGA-66-2790-01A-01R-0980-07
TCGA-85-8352-01A-31R-2326-07
TCGA-77-8156-01A-11R-2247-07
TCGA-60-2696-01A-01R-0851-07
TCGA-60-2703-01A-11R-2045-07
TCGA-60-2714-01A-01R-0851-07
TCGA-39-5031-01A-01R-1443-07
TCGA-60-2722-01A-01R-0851-07
TCGA-NC-A5HR-01A-21R-A26W-07
TCGA-22-4605-01A-21R-2125-07
TCGA-43-6770-01A-11R-1820-07
TCGA-77-7138-01A-41R-2045-07
TCGA-60-2704-01A-11R-2045-07
TCGA-77-8146-01A-11R-2247-07
TCGA-NC-A5HG-01A-11R-A26W-07
TCGA-63-6202-01A-11R-1820-07
TCGA-63-A5MG-01A-12R-A27Q-07
TCGA-22-1011-01A-01R-0692-07
TCGA-34-A5IX-01A-12R-A27Q-07
TCGA-34-2608-01A-02R-0851-07
TCGA-63-A5MI-01A-12R-A27Q-07
TCGA-56-7582-01A-11R-2045-07
TCGA-33-4587-01A-11R-2125-07
TCGA-33-4538-01A-01R-1201-07
TCGA-43-A56U-01A-11R-A26W-07
TCGA-77-7142-01A-11R-2045-07
TCGA-77-7463-01A-11R-2045-07
TCGA-77-8143-01A-11R-2247-07
TCGA-21-5782-01A-01R-1635-07
TCGA-98-A53C-01A-11R-A262-07
TCGA-43-7656-01A-11R-2125-07
TCGA-21-1078-01A-01R-0692-07
TCGA-85-8048-01A-11R-2247-07
TCGA-LA-A7SW-01A-11R-A405-07
TCGA-56-8624-01A-11R-2403-07
TCGA-18-3407-01A-01R-0980-07
TCGA-18-4086-01A-01R-1100-07
TCGA-34-5241-01A-01R-1443-07
TCGA-90-A59Q-01A-11R-A26W-07
TCGA-34-2596-01A-01R-0851-07
TCGA-85-8351-01A-11R-2296-07
TCGA-NC-A5HI-01A-11R-A26W-07
TCGA-22-5474-01A-01R-1635-07
TCGA-66-2768-01A-01R-0851-07
TCGA-52-7622-01A-11R-2125-07
TCGA-77-A5GH-01A-11R-A27Q-07
TCGA-18-3417-01A-01R-1443-07
TCGA-34-2600-01A-01R-0851-07
TCGA-NC-A5HQ-01A-11R-A26W-07
TCGA-66-2795-01A-02R-0980-07
TCGA-77-A5GA-01A-11R-A27Q-07
TCGA-63-7020-01A-11R-1949-07
TCGA-63-A5MR-01A-31R-A27Q-07
TCGA-33-AAS8-01A-11R-A405-07
TCGA-77-8136-01A-11R-2247-07
TCGA-68-7757-01B-11R-2296-07
TCGA-39-5030-01A-01R-1443-07
TCGA-22-A5C4-01A-12R-A27Q-07
TCGA-18-4083-01A-01R-1100-07
TCGA-56-A4BY-01A-11R-A24H-07
TCGA-21-5783-01A-41R-2187-07
TCGA-68-8250-01A-11R-2296-07
TCGA-18-3419-01A-01R-0980-07
TCGA-56-6546-01A-11R-1820-07
TCGA-56-7579-01A-11R-2045-07
TCGA-21-1075-01A-01R-0692-07
TCGA-66-2765-01A-01R-0851-07
TCGA-66-2778-01A-02R-0851-07
TCGA-56-8503-01A-11R-2403-07
TCGA-NC-A5HE-01A-11R-A26W-07
TCGA-LA-A446-01A-21R-A24Z-07
TCGA-51-6867-01A-11R-2045-07
TCGA-96-A4JK-01A-11R-A24Z-07
TCGA-77-7338-01A-11R-2045-07
TCGA-85-7843-01A-11R-2125-07
TCGA-77-8150-01A-11R-2247-07
TCGA-46-3767-01A-01R-0980-07
TCGA-92-8064-01A-11R-2247-07
TCGA-92-7340-01A-21R-2045-07
TCGA-60-2697-01A-11R-2125-07
TCGA-43-6771-01A-11R-1820-07
TCGA-85-6798-01A-11R-1949-07
TCGA-NC-A5HF-01A-11R-A26W-07
TCGA-77-8130-01A-11R-2247-07
TCGA-43-2578-01A-01R-0851-07
TCGA-77-8145-01A-11R-2247-07
TCGA-39-5035-01A-01R-1443-07
TCGA-58-8392-01A-11R-2326-07
TCGA-66-2786-01A-01R-0851-07
TCGA-68-7756-01A-11R-2125-07
TCGA-33-4589-01A-01R-1443-07
TCGA-22-0944-01A-01R-0692-07
TCGA-98-A53J-01A-11R-A26W-07
TCGA-70-6723-01A-11R-1820-07
TCGA-43-7657-01A-31R-2125-07
TCGA-63-A5MT-01A-21R-A26W-07
TCGA-NC-A5HP-01A-11R-A26W-07
TCGA-39-5024-01A-21R-1820-07
TCGA-63-7023-01A-11R-1949-07
TCGA-J1-A4AH-01A-31R-A24H-07
TCGA-85-8355-01A-11R-2296-07
TCGA-96-7545-01A-21R-2045-07
TCGA-85-8353-01A-21R-2296-07
TCGA-58-A46N-01A-11R-A24H-07
TCGA-22-1017-01A-01R-0692-07
TCGA-XC-AA0X-01A-32R-A405-07
TCGA-94-A5I4-01A-11R-A26W-07
TCGA-85-8354-01A-31R-2326-07
TCGA-22-5483-01A-01R-1820-07
TCGA-90-A4EE-01A-11R-A24Z-07
TCGA-34-5231-01A-21R-1820-07
TCGA-56-8623-01A-11R-A28V-07
TCGA-66-2759-01A-01R-0851-07
TCGA-66-2770-01A-01R-0851-07
TCGA-56-8307-01A-11R-2296-07
TCGA-43-3394-01A-01R-0980-07
TCGA-60-2695-01A-01R-0851-07
TCGA-22-4593-01A-21R-1820-07
TCGA-56-7222-01A-11R-2045-07
TCGA-22-5491-01A-01R-1635-07
TCGA-98-A53A-01A-11R-A262-07
TCGA-85-A4PA-01A-11R-A24Z-07
TCGA-21-1080-01A-01R-0692-07
TCGA-18-3406-01A-01R-0980-07
TCGA-58-8391-01A-11R-2326-07
TCGA-85-7696-01A-11R-2125-07
TCGA-22-5480-01A-01R-1635-07
TCGA-43-8116-01A-11R-2247-07
TCGA-22-4607-01A-01R-1201-07
TCGA-60-2726-01A-01R-0851-07
TCGA-85-7699-01A-11R-2125-07
TCGA-34-5236-01A-21R-1820-07
TCGA-63-A5ML-01A-31R-A27Q-07
TCGA-33-AASJ-01A-11R-A405-07
TCGA-56-5898-01A-11R-1635-07
TCGA-56-8622-01A-11R-2403-07
TCGA-66-2800-01A-01R-1201-07
TCGA-77-7335-01A-11R-2045-07
TCGA-43-8118-01A-11R-2403-07
TCGA-22-4596-01A-01R-1201-07
TCGA-56-7731-01A-11R-2125-07
TCGA-56-8304-01A-11R-2326-07
TCGA-85-A53L-01A-21R-A26W-07
TCGA-52-7811-01A-11R-2125-07
TCGA-85-7710-01A-11R-2125-07
TCGA-85-8481-01A-11R-2326-07
TCGA-85-A512-01A-11R-A26W-07
TCGA-56-7221-01A-11R-2045-07
TCGA-22-5485-01A-01R-1635-07
TCGA-56-8305-01A-11R-2296-07
TCGA-66-2789-01A-01R-0980-07
TCGA-96-8169-01A-11R-2296-07
TCGA-63-A5MP-01A-11R-A26W-07
TCGA-85-8584-01A-11R-2403-07
TCGA-63-A5MJ-01A-11R-A27Q-07
TCGA-94-7557-01A-11R-2125-07
TCGA-85-8287-01A-11R-2296-07
TCGA-21-A5DI-01A-31R-A26W-07
TCGA-60-2719-01A-01R-0851-07
TCGA-56-7223-01A-11R-2045-07
TCGA-33-4532-01A-01R-1201-07
TCGA-85-A510-01A-11R-A26W-07
TCGA-37-3792-01A-01R-0980-07
TCGA-34-7107-01A-11R-1949-07
TCGA-77-8144-01A-11R-2247-07
TCGA-22-4609-01A-21R-2125-07
TCGA-O2-A52Q-01A-11R-A26W-07
TCGA-43-8115-01A-11R-2247-07
TCGA-77-8128-01A-11R-2247-07
TCGA-94-7033-01A-11R-1949-07
TCGA-63-A5MH-01A-12R-A27Q-07
TCGA-66-2780-01A-01R-0851-07
TCGA-85-7697-01A-11R-2125-07
TCGA-56-A4BW-01A-11R-A24H-07
TCGA-85-A4CN-01A-11R-A24H-07
TCGA-96-8170-01A-11R-2296-07
TCGA-94-A4VJ-01A-11R-A24Z-07
TCGA-22-4604-01A-01R-1201-07
TCGA-58-A46L-01A-11R-A24H-07
TCGA-85-8580-01A-31R-2403-07
TCGA-21-5784-01A-01R-1635-07
TCGA-NC-A5HL-01A-11R-A26W-07
TCGA-90-A4ED-01A-31R-A24Z-07
TCGA-68-A59J-01A-21R-A26W-07
TCGA-60-2720-01A-01R-0851-07
TCGA-94-8491-01A-11R-2326-07
TCGA-66-2793-01A-01R-1201-07
TCGA-77-A5FZ-01A-31R-A27Q-07
TCGA-21-1081-01A-01R-0692-07
TCGA-43-3920-01A-01R-0980-07
TCGA-37-A5EL-01A-11R-A26W-07
TCGA-37-3789-01A-01R-0980-07
TCGA-60-2724-01A-01R-0851-07
TCGA-77-7337-01A-21R-2045-07
TCGA-85-8276-01A-11R-2296-07
TCGA-98-8022-01A-11R-2247-07
TCGA-66-2766-01A-01R-0851-07
TCGA-66-2792-01A-01R-0980-07
TCGA-56-5897-01A-11R-1635-07
TCGA-85-8277-01A-11R-2296-07
TCGA-39-5034-01A-01R-1443-07
TCGA-22-5473-01A-01R-1635-07
TCGA-66-2767-01A-01R-0851-07
TCGA-37-4133-01A-01R-1100-07
TCGA-56-A49D-01A-11R-A24H-07
TCGA-60-2723-01A-01R-0851-07
TCGA-94-8035-01A-11R-2247-07
TCGA-18-3421-01A-01R-0980-07
TCGA-22-4599-01A-01R-1443-07
TCGA-63-A5MS-01A-11R-A26W-07
TCGA-56-8201-01A-11R-2247-07
TCGA-85-8052-01A-11R-2247-07
TCGA-22-5492-01A-01R-1635-07
TCGA-O2-A52N-01A-11R-A26W-07
TCGA-34-5234-01A-01R-1635-07
TCGA-98-A53I-01A-31R-A262-07
TCGA-66-2785-01A-01R-0851-07
TCGA-63-A5MN-01A-22R-A27Q-07
TCGA-85-A4QR-01A-11R-A24Z-07
TCGA-39-5027-01A-21R-1820-07
TCGA-66-2788-01A-01R-0980-07
TCGA-21-1072-01A-01R-0692-07
TCGA-51-4081-01A-01R-1100-07
TCGA-22-1005-01A-01R-0692-07
TCGA-L3-A524-01A-11R-A262-07
TCGA-O2-A52W-01A-11R-A26W-07
TCGA-60-2708-01A-01R-0851-07
TCGA-85-A513-01A-12R-A26W-07
TCGA-77-7465-01A-11R-2045-07
TCGA-58-8393-01A-11R-2326-07
TCGA-77-A5G1-01A-11R-A27Q-07
TCGA-34-5232-01A-21R-1820-07
TCGA-60-2709-01A-21R-1820-07
TCGA-43-A56V-01A-11R-A26W-07
TCGA-34-5928-01A-11R-1820-07
TCGA-56-A4ZK-01A-11R-A262-07
TCGA-39-5037-01A-01R-1443-07
TCGA-77-8131-01A-11R-2247-07
TCGA-77-6842-01A-11R-1949-07
TCGA-96-7544-01A-11R-2045-07
TCGA-18-3415-01A-01R-0980-07
TCGA-66-2794-01A-01R-1201-07
TCGA-90-7767-01A-11R-2125-07
TCGA-85-6560-01A-11R-1820-07
TCGA-58-A46M-01A-11R-A24H-07
TCGA-66-2777-01A-01R-1201-07
TCGA-77-8139-01A-11R-2247-07
TCGA-58-A46K-01A-11R-A24H-07
TCGA-77-A5G7-01B-11R-A27Q-07
TCGA-85-A4CL-01A-41R-A26W-07
TCGA-18-3416-01A-01R-0980-07
TCGA-43-5668-01A-01R-1635-07
TCGA-43-5670-01A-21R-2125-07
TCGA-21-1082-01A-01R-0692-07
TCGA-NC-A5HD-01A-11R-A26W-07
TCGA-66-2769-01A-02R-0851-07
TCGA-33-4547-01A-01R-1201-07
TCGA-21-1071-01A-01R-0692-07
TCGA-33-AASD-01A-11R-A405-07
TCGA-39-5029-01A-01R-1443-07
TCGA-MF-A522-01A-11R-A262-07
TCGA-51-4079-01A-01R-1100-07

## Sheet: STAD
TCGA barcode
TCGA-IN-AB1V-11A-11R-A414-31
TCGA-BR-7716-11A-01R-2055-13
TCGA-CG-5734-11A-01R-1602-13
TCGA-IN-7806-11A-01R-2055-13
TCGA-CG-5733-11A-01R-1602-13
TCGA-CG-5730-11A-01R-1602-13
TCGA-CG-5721-11A-01R-1602-13
TCGA-FP-7829-11A-01R-2055-13
TCGA-HU-A4GY-11A-11R-A36D-31
TCGA-BR-7704-11A-01R-2055-13
TCGA-BR-7851-11A-01R-2203-13
TCGA-HU-A4HB-11A-11R-A251-31
TCGA-HU-A4GH-11A-11R-A36D-31
TCGA-CG-5728-11A-01R-1602-13
TCGA-BR-7703-11A-01R-2055-13
TCGA-CG-5720-11A-01R-1602-13
TCGA-HU-A4GN-11A-12R-A251-31
TCGA-FP-7735-11A-01R-2055-13
TCGA-BR-6802-11A-01R-1884-13
TCGA-BR-8060-11A-01R-2343-13
TCGA-HU-A4GP-11A-21R-A251-31
TCGA-BR-6453-11A-01R-1802-13
TCGA-CG-5722-11A-02R-1602-13
TCGA-BR-6454-11A-01R-1802-13
TCGA-IP-7968-11A-01R-2203-13
TCGA-IN-AB1X-11A-21R-A39E-31
TCGA-IN-8663-11A-01R-2402-13
TCGA-BR-7717-11A-01R-2055-13
TCGA-HU-A4GC-11A-11R-A251-31
TCGA-BR-7715-11A-01R-2055-13
TCGA-BR-6457-11A-01R-1802-13
TCGA-HU-8238-11A-01R-2343-13
TCGA-B7-A5TK-01A-12R-A36D-31
TCGA-BR-7959-01A-11R-2343-13
TCGA-IN-8462-01A-11R-2343-13
TCGA-BR-A4CR-01A-11R-A24K-31
TCGA-CG-4443-01A-01R-1157-13
TCGA-KB-A93J-01A-11R-A39E-31
TCGA-BR-4371-01A-01R-1157-13
TCGA-IN-A6RO-01A-12R-A33Y-31
TCGA-HU-A4H3-01A-21R-A251-31
TCGA-RD-A8MV-01A-11R-A36D-31
TCGA-VQ-A91X-01A-12R-A414-31
TCGA-D7-8575-01A-11R-2343-13
TCGA-BR-4257-01A-01R-1131-13
TCGA-BR-8485-01A-11R-2402-13
TCGA-BR-4370-01A-01R-1157-13
TCGA-D7-A748-01A-12R-A32D-31
TCGA-VQ-A91Z-01A-11R-A414-31
TCGA-RD-A7C1-01A-11R-A32D-31
TCGA-CG-4465-01A-01R-1157-13
TCGA-BR-8384-01A-21R-2402-13
TCGA-HU-A4G8-01A-11R-A251-31
TCGA-BR-8382-01A-11R-2402-13
TCGA-HU-A4G9-01A-11R-A24K-31
TCGA-BR-8289-01A-11R-2343-13
TCGA-BR-A44U-01A-11R-A36D-31
TCGA-HF-A5NB-01A-11R-A31P-31
TCGA-R5-A7ZE-01B-11R-A354-31
TCGA-HU-A4H8-01A-11R-A251-31
TCGA-FP-7829-01A-11R-2055-13
TCGA-D7-6522-01A-11R-1802-13
TCGA-CD-A487-01A-21R-A24K-31
TCGA-HU-A4GF-01A-11R-A24K-31
TCGA-R5-A7O7-01A-11R-A33Y-31
TCGA-RD-A7BT-01A-11R-A33Y-31
TCGA-IN-A6RN-01A-12R-A33Y-31
TCGA-CG-5719-01A-11R-1602-13
TCGA-D7-A6EV-01A-11R-A31P-31
TCGA-BR-8060-01A-11R-2343-13
TCGA-HF-7134-01A-11R-2055-13
TCGA-VQ-A8PM-01A-21R-A414-31
TCGA-D7-6818-01A-11R-1884-13
TCGA-HU-A4GX-01A-12R-A251-31
TCGA-BR-8371-01A-11R-2343-13
TCGA-D7-6524-01A-11R-1802-13
TCGA-D7-5577-01A-01R-1602-13
TCGA-CG-5725-01A-11R-1602-13
TCGA-CD-8528-01A-11R-2343-13
TCGA-VQ-A94P-01A-13R-A414-31
TCGA-R5-A805-01A-11R-A36D-31
TCGA-CD-8532-01A-11R-2343-13
TCGA-RD-A8N4-01A-21R-A36D-31
TCGA-BR-8676-01A-11R-2402-13
TCGA-BR-8297-01A-12R-2343-13
TCGA-HU-A4H4-01A-21R-A251-31
TCGA-VQ-A8P3-01A-11R-A36D-31
TCGA-BR-7851-01A-11R-2203-13
TCGA-BR-6453-01A-11R-1802-13
TCGA-RD-A8N6-01A-11R-A36D-31
TCGA-HF-7133-01A-11R-2055-13
TCGA-BR-4361-01A-01R-1157-13
TCGA-D7-8572-01A-11R-2343-13
TCGA-CG-4437-01A-01R-1802-13
TCGA-R5-A7ZR-01A-11R-A354-31
TCGA-IN-A6RJ-01A-21R-A33Y-31
TCGA-VQ-A91S-01A-11R-A414-31
TCGA-BR-8686-01A-11R-2402-13
TCGA-VQ-A8PP-01A-21R-A414-31
TCGA-D7-6520-01A-11R-1802-13
TCGA-VQ-A8P8-01A-11R-A39E-31
TCGA-FP-8631-01A-11R-2402-13
TCGA-VQ-AA6J-01A-11R-A414-31
TCGA-ZA-A8F6-01A-23R-A36D-31
TCGA-BR-6707-01A-11R-1884-13
TCGA-HU-8610-01A-22R-2402-13
TCGA-FP-A4BF-01A-12R-A36D-31
TCGA-IN-A7NT-01A-21R-A354-31
TCGA-SW-A7EB-01A-11R-A354-31
TCGA-CD-A486-01A-11R-A24K-31
TCGA-HU-8608-01A-11R-2402-13
TCGA-BR-A4QL-01A-31R-A251-31
TCGA-D7-6521-01A-11R-1802-13
TCGA-RD-A8N5-01A-12R-A36D-31
TCGA-VQ-A91V-01A-11R-A414-31
TCGA-VQ-A8DZ-01A-11R-A36D-31
TCGA-D7-6519-01A-11R-1802-13
TCGA-VQ-A8P2-01A-11R-A36D-31
TCGA-BR-6710-01A-11R-1884-13
TCGA-KB-A93H-01A-11R-A39E-31
TCGA-CG-4438-01A-01R-1157-13
TCGA-BR-6452-01A-12R-1802-13
TCGA-CG-4440-01A-01R-1157-13
TCGA-IN-7808-01A-11R-2203-13
TCGA-CD-8529-01A-11R-2343-13
TCGA-CG-4444-01A-01R-1157-13
TCGA-RD-A7BS-01A-11R-A32D-31
TCGA-IN-A6RL-01A-11R-A32D-31
TCGA-D7-A4Z0-01A-22R-A251-31
TCGA-VQ-A8PK-01A-12R-A414-31
TCGA-BR-8680-01A-11R-2402-13
TCGA-CG-4304-01A-01R-1157-13
TCGA-BR-6563-01A-13R-2055-13
TCGA-BR-4363-01A-01R-1157-13
TCGA-BR-A4IV-01A-31R-A251-31
TCGA-D7-A74A-01A-11R-A32D-31
TCGA-CD-8530-01A-11R-2343-13
TCGA-D7-6815-01A-11R-1884-13
TCGA-BR-8367-01A-11R-2343-13
TCGA-D7-A6F0-01A-11R-A31P-31
TCGA-BR-A4J7-01A-31R-A251-31
TCGA-CG-4301-01A-01R-1157-13
TCGA-FP-A9TM-01A-11R-A39E-31
TCGA-CD-8534-01A-11R-2343-13
TCGA-D7-8576-01A-11R-2343-13
TCGA-HU-A4GD-01A-11R-A36D-31
TCGA-HJ-7597-01A-21R-2203-13
TCGA-MX-A663-01A-11R-A31P-31
TCGA-VQ-A8PX-01A-12R-A414-31
TCGA-HU-A4H6-01A-11R-A251-31
TCGA-BR-8059-01A-11R-2343-13
TCGA-D7-6525-01A-11R-1802-13
TCGA-D7-8579-01A-11R-2343-13
TCGA-IN-AB1V-01A-21R-A414-31
TCGA-VQ-A91E-01A-31R-A414-31
TCGA-BR-8678-01A-11R-2402-13
TCGA-CG-4462-01A-01R-1157-13
TCGA-BR-A4J6-01A-11R-A251-31
TCGA-HU-A4HB-01A-12R-A251-31
TCGA-BR-7957-01A-11R-2203-13
TCGA-CD-8526-01A-11R-2343-13
TCGA-CG-4305-01A-01R-1157-13
TCGA-BR-8372-01A-11R-2343-13
TCGA-BR-6801-01A-11R-1884-13
TCGA-BR-4201-01A-01R-1131-13
TCGA-IN-A6RI-01A-11R-A32D-31
TCGA-VQ-A927-01A-12R-A414-31
TCGA-VQ-AA6K-01A-11R-A414-31
TCGA-BR-8366-01A-11R-2343-13
TCGA-BR-6852-01A-11R-1884-13
TCGA-IN-8663-01A-11R-2402-13
TCGA-D7-A6F2-01A-12R-A31P-31
TCGA-HU-A4HD-01A-11R-A251-31
TCGA-BR-6803-01A-11R-1884-13
TCGA-BR-6455-01A-11R-1802-13
TCGA-BR-6456-01A-11R-1802-13
TCGA-BR-8365-01A-21R-2343-13
TCGA-BR-8058-01A-31R-2343-13
TCGA-BR-8364-01A-11R-2343-13
TCGA-BR-7707-01A-11R-2055-13
TCGA-3M-AB46-01A-11R-A414-31
TCGA-RD-A8N0-01A-12R-A36D-31
TCGA-B7-5818-01A-11R-1602-13
TCGA-HU-A4GJ-01A-11R-A251-31
TCGA-D7-8570-01A-11R-2343-13
TCGA-B7-A5TJ-01A-11R-A31P-31
TCGA-BR-8296-01A-11R-2343-13
TCGA-FP-8211-01A-11R-2343-13
TCGA-D7-8574-01A-13R-2343-13
TCGA-VQ-A94T-01A-11R-A414-31
TCGA-BR-8077-01A-11R-2343-13
TCGA-FP-7916-01A-11R-2203-13
TCGA-D7-A6EX-01A-11R-A31P-31
TCGA-BR-4294-01A-01R-1131-13
TCGA-BR-A4CS-01A-11R-A24K-31
TCGA-BR-6802-01A-11R-1884-13
TCGA-F1-A448-01A-11R-A24K-31
TCGA-CG-5716-01A-21R-1802-13
TCGA-HU-A4GQ-01A-11R-A36D-31
TCGA-CD-5798-01A-11R-1602-13
TCGA-FP-7735-01A-11R-2055-13
TCGA-CG-5734-01A-11R-1602-13
TCGA-BR-4279-01A-01R-1131-13
TCGA-BR-8368-01A-11R-2343-13
TCGA-BR-7715-01A-11R-2055-13
TCGA-IN-A7NU-01A-22R-A354-31
TCGA-HU-A4H2-01A-11R-A251-31
TCGA-CD-5801-01A-11R-1602-13
TCGA-CG-5718-01A-11R-1602-13
TCGA-HU-A4GC-01A-12R-A251-31
TCGA-CD-5813-01A-11R-1602-13
TCGA-D7-6822-01A-11R-1884-13
TCGA-BR-4357-01A-01R-1157-13
TCGA-VQ-AA68-01A-11R-A414-31
TCGA-CG-5723-01A-11R-1602-13
TCGA-MX-A5UG-01A-21R-A31P-31
TCGA-VQ-A8PB-01A-11R-A39E-31
TCGA-CD-8535-01A-11R-2343-13
TCGA-BR-8487-01A-11R-2402-13
TCGA-VQ-A8E2-01A-11R-A36D-31
TCGA-F1-6177-01A-11R-1802-13
TCGA-D7-A6EY-01A-21R-A31P-31
TCGA-VQ-A928-01A-11R-A414-31
TCGA-VQ-A91U-01A-11R-A414-31
TCGA-IN-AB1X-01A-11R-A39E-31
TCGA-VQ-A8E7-01B-11R-A414-31
TCGA-VQ-A8PC-01A-11R-A39E-31
TCGA-BR-8361-01A-11R-2343-13
TCGA-HU-8604-01A-11R-2402-13
TCGA-CD-8525-01A-11R-2343-13
TCGA-BR-8483-01A-31R-2402-13
TCGA-CD-A4MG-01A-11R-A251-31
TCGA-D7-A4YU-01A-21R-A251-31
TCGA-3M-AB47-01A-22R-A414-31
TCGA-VQ-AA6D-01A-11R-A414-31
TCGA-BR-A4J5-01A-21R-A251-31
TCGA-RD-A8MW-01A-11R-A36D-31
TCGA-BR-8687-01A-11R-2402-13
TCGA-CG-5732-01A-11R-1602-13
TCGA-BR-7958-01A-21R-2343-13
TCGA-D7-5578-01A-01R-1602-13
TCGA-VQ-AA6A-01A-11R-A414-31
TCGA-HU-A4GU-01A-11R-A251-31
TCGA-VQ-A91K-01A-11R-A414-31
TCGA-BR-8284-01A-11R-2343-13
TCGA-BR-A4J4-01A-12R-A251-31
TCGA-CD-5799-01A-11R-1602-13
TCGA-D7-8573-01A-11R-2343-13
TCGA-BR-6454-01A-11R-1802-13
TCGA-CG-5724-01A-11R-1602-13
TCGA-HU-A4GP-01A-11R-A251-31
TCGA-BR-4187-01A-01R-1131-13
TCGA-VQ-A8PU-01A-12R-A414-31
TCGA-VQ-A91Y-01A-11R-A414-31
TCGA-FP-8210-01A-11R-2343-13
TCGA-CG-4475-01A-01R-1157-13
TCGA-BR-8291-01A-11R-2343-13
TCGA-BR-8683-01A-11R-2402-13
TCGA-BR-6565-01A-11R-1802-13
TCGA-BR-8592-01A-11R-2402-13
TCGA-VQ-AA69-01A-11R-A414-31
TCGA-BR-8679-01A-11R-2402-13
TCGA-HF-7132-01A-11R-2055-13
TCGA-ZQ-A9CR-01A-11R-A39E-31
TCGA-RD-A7BW-01A-11R-A32D-31
TCGA-D7-6528-01A-11R-1802-13
TCGA-VQ-A8PJ-01A-11R-A414-31
TCGA-CG-5722-01A-21R-1602-13
TCGA-F1-A72C-01A-21R-A33Y-31
TCGA-CD-8533-01A-11R-2343-13
TCGA-BR-7717-01A-11R-2055-13
TCGA-VQ-A925-01A-11R-A414-31
TCGA-VQ-A8DV-01A-12R-A36D-31
TCGA-IN-7806-01A-11R-2055-13
TCGA-CG-4306-01A-01R-1157-13
TCGA-HF-7131-01A-11R-2055-13
TCGA-VQ-A922-01A-11R-A414-31
TCGA-HU-8249-01A-11R-A36D-31
TCGA-FP-7998-01A-11R-2203-13
TCGA-R5-A7ZF-01A-11R-A354-31
TCGA-VQ-A924-01A-11R-A414-31
TCGA-BR-8080-01A-11R-2343-13
TCGA-IN-A6RR-01A-12R-A32D-31
TCGA-BR-4253-01A-01R-1131-13
TCGA-BR-4368-01A-01R-1157-13
TCGA-VQ-A92D-01A-11R-A414-31
TCGA-CG-5726-01A-11R-1602-13
TCGA-EQ-8122-01A-11R-2343-13
TCGA-BR-7716-01A-21R-2055-13
TCGA-BR-8486-01A-31R-2402-13
TCGA-BR-8591-01A-11R-2402-13
TCGA-BR-4267-01A-01R-1131-13
TCGA-BR-8588-01A-11R-2402-13
TCGA-VQ-AA6F-01A-31R-A414-31
TCGA-HU-A4GT-01A-21R-A251-31
TCGA-D7-8578-01A-21R-2343-13
TCGA-CD-5804-01A-12R-2055-13
TCGA-BR-6457-01A-21R-1802-13
TCGA-VQ-A8PD-01A-11R-A414-31
TCGA-VQ-A91A-01A-11R-A414-31
TCGA-IN-A7NR-01A-11R-A354-31
TCGA-FP-8209-01A-11R-2343-13
TCGA-MX-A5UJ-01A-11R-A31P-31
TCGA-BR-8369-01A-11R-2343-13
TCGA-RD-A8NB-01A-12R-A39E-31
TCGA-D7-6527-01A-11R-1802-13
TCGA-BR-6705-01A-12R-1884-13
TCGA-HU-8602-01A-11R-2402-13
TCGA-BR-4369-01A-01R-1157-13
TCGA-BR-8381-01A-11R-2402-13
TCGA-D7-A4YX-01A-11R-A251-31
TCGA-RD-A8N1-01A-12R-A36D-31
TCGA-D7-A747-01A-22R-A33Y-31
TCGA-BR-8484-01A-11R-2402-13
TCGA-BR-A4J8-01A-11R-A251-31
TCGA-CD-8531-01A-11R-2343-13
TCGA-BR-6564-01A-12R-1884-13
TCGA-BR-8286-01A-12R-2343-13
TCGA-BR-8677-01A-11R-2402-13
TCGA-HU-A4GH-01A-11R-A24K-31
TCGA-BR-8690-01A-11R-2402-13
TCGA-B7-A5TI-01A-11R-A31P-31
TCGA-VQ-A94O-01A-11R-A414-31
TCGA-R5-A7ZI-01A-11R-A354-31
TCGA-BR-7722-01A-31R-2203-13
TCGA-VQ-A8E3-01A-11R-A39E-31
TCGA-BR-6709-01A-11R-1884-13
TCGA-CD-A48C-01A-11R-A24K-31
TCGA-VQ-A8PH-01A-12R-A414-31
TCGA-HU-A4G3-01A-11R-A24K-31
TCGA-HU-8238-01A-11R-2343-13
TCGA-CD-A489-01A-11R-A24K-31
TCGA-MX-A666-01A-11R-A31P-31
TCGA-F1-6874-01A-11R-1884-13
TCGA-CG-4466-01A-01R-1157-13
TCGA-CD-5803-01A-11R-1602-13
TCGA-CG-4477-01A-01R-1157-13
TCGA-BR-7901-01A-11R-2203-13
TCGA-KB-A6F7-01A-12R-A32D-31
TCGA-VQ-A8PF-01A-11R-A414-31
TCGA-BR-6458-01A-11R-1802-13
TCGA-HU-A4G2-01A-11R-A251-31
TCGA-HU-A4H0-01A-11R-A251-31
TCGA-BR-A4J9-01A-12R-A251-31
TCGA-BR-7196-01A-11R-2055-13
TCGA-CG-5721-01A-11R-1602-13
TCGA-VQ-A8PO-01A-11R-A414-31
TCGA-IP-7968-01A-11R-2203-13
TCGA-VQ-A923-01A-11R-A414-31
TCGA-BR-4256-01A-01R-1131-13
TCGA-VQ-A8DT-01A-11R-A36D-31
TCGA-KB-A93G-01A-11R-A39E-31
TCGA-IN-A6RS-01A-12R-A354-31
TCGA-VQ-A91Q-01A-12R-A414-31
TCGA-CG-4469-01A-01R-1157-13
TCGA-CD-8524-01A-11R-2343-13
TCGA-VQ-A94U-01A-12R-A414-31
TCGA-BR-8589-01A-11R-2402-13
TCGA-BR-7197-01A-11R-2203-13
TCGA-BR-8081-01A-11R-2343-13
TCGA-BR-8295-01A-11R-2343-13
TCGA-VQ-A8PQ-01A-11R-A414-31
TCGA-FP-A8CX-01A-11R-A36D-31
TCGA-VQ-A91D-01A-11R-A414-31
TCGA-BR-A4PF-01A-11R-A251-31
TCGA-CD-A48A-01A-12R-A36D-31
TCGA-BR-7723-01A-11R-2055-13
TCGA-VQ-A91N-01A-11R-A414-31
TCGA-F1-6875-01A-11R-2055-13
TCGA-VQ-A8PE-01A-11R-A414-31
TCGA-RD-A8N9-01A-12R-A39E-31
TCGA-BR-8590-01A-11R-2402-13
TCGA-BR-8373-01A-11R-2343-13
TCGA-HU-8244-01A-11R-2343-13
TCGA-B7-A5TN-01A-21R-A31P-31
TCGA-CG-4442-01A-01R-1157-13
TCGA-D7-6526-01A-11R-1802-13
TCGA-BR-8380-01A-11R-2343-13
TCGA-CD-A4MH-01A-11R-A251-31
TCGA-CG-4436-01A-01R-1157-13
TCGA-BR-4191-01A-02R-1131-13
TCGA-SW-A7EA-01A-12R-A354-31
TCGA-CG-5717-01A-11R-1602-13
TCGA-CD-8527-01A-11R-2343-13
TCGA-HU-A4H5-01A-21R-A251-31
TCGA-CG-4476-01A-01R-1157-13
TCGA-CD-5800-01A-11R-1602-13
TCGA-BR-6566-01A-11R-1802-13
TCGA-D7-A6EZ-01A-11R-A31P-31
TCGA-BR-8682-01A-11R-2402-13
TCGA-VQ-A94R-01A-11R-A414-31
TCGA-VQ-A8DU-01A-11R-A36D-31
TCGA-VQ-A8E0-01A-11R-A414-31
TCGA-BR-4366-01A-01R-1157-13
TCGA-VQ-A8P5-01A-11R-A39E-31
TCGA-BR-4280-01A-01R-1131-13
TCGA-RD-A8N2-01A-12R-A36D-31
TCGA-CG-4441-01A-01R-1802-13
TCGA-FP-8099-01A-11R-2343-13
TCGA-BR-7704-01A-11R-2055-13
TCGA-BR-A44T-01A-32R-A24K-31
TCGA-BR-4367-01A-01R-1157-13
TCGA-VQ-AA6G-01A-11R-A414-31
TCGA-CG-4460-01A-01R-1157-13
TCGA-VQ-AA64-01A-11R-A414-31
TCGA-HU-A4GY-01A-21R-A24K-31
TCGA-CG-5720-01A-11R-1602-13

## Sheet: THCA
TCGA barcode
TCGA-BJ-A3PU-11A-11R-A220-07
TCGA-EL-A3H7-11A-11R-A21D-07
TCGA-EM-A1CV-11A-11R-A13Y-07
TCGA-EL-A3ZS-11A-11R-A23N-07
TCGA-EL-A3T7-11A-21R-A22L-07
TCGA-BJ-A290-11A-11R-A180-07
TCGA-EM-A3ST-11A-11R-A22U-07
TCGA-BJ-A28X-11A-11R-A22L-07
TCGA-EL-A3T6-11A-11R-A220-07
TCGA-EL-A3T2-11A-11R-A22L-07
TCGA-EL-A3ZO-11A-12R-A23N-07
TCGA-EM-A1CS-11A-21R-A13Y-07
TCGA-EL-A3ZL-11A-11R-A23N-07
TCGA-BJ-A2N7-11A-11R-A18C-07
TCGA-ET-A3DP-11A-22R-A21D-07
TCGA-H2-A2K9-11A-11R-A180-07
TCGA-EL-A3H2-11A-11R-A20F-07
TCGA-EL-A3ZT-11A-13R-A23N-07
TCGA-EM-A1YC-11A-11R-A14Y-07
TCGA-EL-A3ZM-11A-12R-A23N-07
TCGA-EL-A3GZ-11A-11R-A20F-07
TCGA-EL-A3ZK-11A-11R-A23N-07
TCGA-BJ-A28R-11A-11R-A16R-07
TCGA-BJ-A28W-11A-11R-A32Y-07
TCGA-EL-A3T0-11A-12R-A22L-07
TCGA-BJ-A2NA-11A-11R-A19O-07
TCGA-KS-A41L-11A-11R-A23N-07
TCGA-EL-A3TB-11A-11R-A22L-07
TCGA-EL-A3N3-11A-11R-A20F-07
TCGA-EM-A1CU-11A-11R-A13Y-07
TCGA-EL-A3T8-11A-11R-A22L-07
TCGA-BJ-A3PR-11A-11R-A220-07
TCGA-KS-A41I-11A-11R-A23N-07
TCGA-EL-A3N2-11A-11R-A20F-07
TCGA-EL-A3TA-11A-12R-A22L-07
TCGA-EL-A3MW-11A-11R-A20F-07
TCGA-EL-A3ZR-11A-11R-A23N-07
TCGA-FY-A3TY-11A-12R-A22U-07
TCGA-EM-A1CW-11A-12R-A13Y-07
TCGA-EL-A3H1-11A-11R-A21D-07
TCGA-GE-A2C6-11A-11R-A16R-07
TCGA-EL-A3MX-11A-11R-A21D-07
TCGA-EL-A3ZH-11A-11R-A23N-07
TCGA-ET-A2N5-11B-11R-A18C-07
TCGA-EM-A1CT-11A-11R-A13Y-07
TCGA-EL-A3ZP-11A-11R-A23N-07
TCGA-EL-A3MY-11A-12R-A21D-07
TCGA-BJ-A2N9-11A-11R-A18C-07
TCGA-KS-A41J-11A-12R-A23N-07
TCGA-EL-A3ZQ-11A-11R-A23N-07
TCGA-EL-A3ZG-11A-13R-A23N-07
TCGA-DO-A1JZ-11A-11R-A13Y-07
TCGA-ET-A3DW-11A-11R-A19O-07
TCGA-EL-A3T3-11A-11R-A22L-07
TCGA-BJ-A2N8-11A-11R-A18C-07
TCGA-EL-A3T1-11A-11R-A22L-07
TCGA-E8-A2JQ-11A-11R-A180-07
TCGA-ET-A2MX-11C-11R-A23N-07
TCGA-EL-A3D0-01A-12R-A206-07
TCGA-J8-A4HY-01A-11R-A250-07
TCGA-L6-A4ET-01A-11R-A250-07
TCGA-DE-A4MC-01A-11R-A250-07
TCGA-ET-A25K-01A-11R-A16R-07
TCGA-DJ-A3UU-01A-11R-A22L-07
TCGA-EM-A1YA-01A-11R-A14Y-07
TCGA-CE-A483-01A-11R-A23W-07
TCGA-DJ-A3VD-01A-11R-A23N-07
TCGA-BJ-A28S-01A-11R-A19O-07
TCGA-FY-A3R9-01A-11R-A220-07
TCGA-FY-A3R8-01A-11R-A220-07
TCGA-DJ-A3V2-01A-11R-A22U-07
TCGA-ET-A25L-01A-11R-A16R-07
TCGA-EL-A3D1-01A-11R-A19O-07
TCGA-FY-A3I4-01A-11R-A21D-07
TCGA-DJ-A3UV-01A-11R-A22L-07
TCGA-BJ-A28T-01A-11R-A16R-07
TCGA-EM-A3FQ-01A-11R-A21D-07
TCGA-J8-A4HW-01A-11R-A250-07
TCGA-MK-A4N6-01A-11R-A250-07
TCGA-DJ-A3V8-01A-11R-A23N-07
TCGA-DJ-A1QI-01A-11R-A14Y-07
TCGA-EL-A3H8-01A-11R-A20F-07
TCGA-EM-A3O3-01A-11R-A220-07
TCGA-IM-A3U3-01A-11R-A22L-07
TCGA-BJ-A191-01A-11R-A13Y-07
TCGA-E8-A3X7-01A-11R-A22U-07
TCGA-FY-A3YR-01A-11R-A22U-07
TCGA-KS-A41I-01A-11R-A23N-07
TCGA-EL-A3CS-01A-21R-A19O-07
TCGA-EL-A3GU-01A-11R-A21D-07
TCGA-EM-A1CU-01A-11R-A13Y-07
TCGA-H2-A26U-01A-11R-A16R-07
TCGA-DJ-A2PT-01A-11R-A18C-07
TCGA-DJ-A3V6-01A-11R-A22U-07
TCGA-DJ-A2Q7-01A-11R-A18C-07
TCGA-ET-A3BV-01A-11R-A19O-07
TCGA-EL-A3ZL-01A-11R-A23N-07
TCGA-CE-A13K-01A-11R-A10U-07
TCGA-DJ-A3UQ-01A-11R-A22L-07
TCGA-BJ-A45H-01A-12R-A23W-07
TCGA-L6-A4EU-01A-11R-A250-07
TCGA-DJ-A3VM-01A-11R-A23N-07
TCGA-H2-A3RH-01A-11R-A220-07
TCGA-EL-A3ZR-01A-11R-A23N-07
TCGA-BJ-A291-01A-11R-A16R-07
TCGA-MK-A4N9-01A-11R-A250-07
TCGA-EL-A3MZ-01A-11R-A21D-07
TCGA-EM-A2CP-01A-11R-A180-07
TCGA-DJ-A2PZ-01A-21R-A18C-07
TCGA-EL-A3ZG-01A-11R-A23N-07
TCGA-FE-A3PC-01A-11R-A220-07
TCGA-BJ-A0YZ-01A-11R-A10U-07
TCGA-DJ-A13M-01A-11R-A10U-07
TCGA-EM-A3OA-01A-11R-A220-07
TCGA-J8-A3YE-01A-12R-A23N-07
TCGA-BJ-A0Z9-01A-11R-A10U-07
TCGA-EL-A3CW-01A-11R-A19O-07
TCGA-FY-A3R6-01A-11R-A220-07
TCGA-H2-A2K9-01A-11R-A180-07
TCGA-DJ-A2PO-01A-21R-A19O-07
TCGA-FY-A40N-01A-11R-A23N-07
TCGA-EM-A1YD-01A-11R-A14Y-07
TCGA-DE-A69J-01A-21R-A39I-07
TCGA-EL-A3MX-01A-11R-A21D-07
TCGA-J8-A3YG-01A-11R-A22U-07
TCGA-BJ-A0ZC-01A-12R-A13Y-07
TCGA-FY-A40K-01A-11R-A23N-07
TCGA-EL-A4K6-01A-12R-A250-07
TCGA-EL-A3H3-01A-11R-A206-07
TCGA-BJ-A290-01A-11R-A180-07
TCGA-BJ-A28Z-01A-11R-A16R-07
TCGA-CE-A484-01A-11R-A23W-07
TCGA-EM-A3FL-01A-11R-A21D-07
TCGA-EL-A3GO-01A-11R-A206-07
TCGA-ET-A39T-01A-11R-A19O-07
TCGA-EM-A2CK-01A-11R-A180-07
TCGA-DJ-A4UQ-01A-11R-A250-07
TCGA-DJ-A3UO-01A-11R-A22L-07
TCGA-DJ-A1QM-01A-11R-A14Y-07
TCGA-ET-A3BS-01A-11R-A206-07
TCGA-EM-A3AO-01A-11R-A206-07
TCGA-DJ-A3UN-01A-11R-A22L-07
TCGA-DJ-A13W-01A-11R-A10U-07
TCGA-DJ-A3VE-01A-11R-A23N-07
TCGA-DJ-A3VI-01A-11R-A23N-07
TCGA-EM-A2CO-01A-11R-A19O-07
TCGA-ET-A39L-01A-12R-A19O-07
TCGA-EM-A3FO-01A-11R-A21D-07
TCGA-E8-A418-01A-11R-A23N-07
TCGA-DE-A4M9-01A-11R-A250-07
TCGA-BJ-A28W-01A-11R-A32Y-07
TCGA-DJ-A2Q6-01A-11R-A18C-07
TCGA-EL-A3N2-01A-11R-A20F-07
TCGA-FK-A3SG-01A-11R-A22L-07
TCGA-DJ-A3UM-01A-11R-A22L-07
TCGA-BJ-A45E-01A-11R-A32Y-07
TCGA-E8-A415-01A-11R-A23N-07
TCGA-DJ-A4UP-01A-11R-A250-07
TCGA-ET-A39J-01A-11R-A19O-07
TCGA-KS-A41J-01A-11R-A23N-07
TCGA-BJ-A4O9-01A-11R-A250-07
TCGA-EM-A2CM-01A-11R-A180-07
TCGA-EM-A2OW-01A-11R-A206-07
TCGA-FE-A3PA-01A-12R-A220-07
TCGA-QD-A8IV-01A-11R-A39I-07
TCGA-IM-A3U2-01A-21R-A22L-07
TCGA-EL-A3H5-01A-11R-A206-07
TCGA-DJ-A13R-01A-11R-A10U-07
TCGA-ET-A2MY-01A-11R-A18C-07
TCGA-IM-A3EB-01A-11R-A206-07
TCGA-DJ-A1QF-01A-12R-A14Y-07
TCGA-EL-A3T1-01A-11R-A22L-07
TCGA-FE-A237-01A-11R-A16R-07
TCGA-EM-A3FJ-01A-11R-A21D-07
TCGA-EL-A3D4-01A-11R-A19O-07
TCGA-FE-A234-01A-11R-A14Y-07
TCGA-FY-A40M-01A-11R-A23N-07
TCGA-EM-A2OX-01A-11R-A206-07
TCGA-EM-A4FR-01A-11R-A250-07
TCGA-EM-A22I-01A-11R-A180-07
TCGA-FY-A3ON-01A-11R-A220-07
TCGA-EM-A1YC-01A-11R-A14Y-07
TCGA-EL-A3TA-01A-12R-A22L-07
TCGA-CE-A27D-01A-11R-A16R-07
TCGA-ET-A3BT-01A-11R-A19O-07
TCGA-DJ-A13U-01A-11R-A10U-07
TCGA-EM-A3O8-01A-11R-A220-07
TCGA-H2-A422-01A-11R-A23N-07
TCGA-EL-A3CL-01A-11R-A19O-07
TCGA-DJ-A13V-01A-11R-A10U-07
TCGA-EM-A22Q-01A-11R-A180-07
TCGA-EM-A22J-01A-11R-A180-07
TCGA-BJ-A0Z2-01A-11R-A10U-07
TCGA-E3-A3E3-01A-11R-A20F-07
TCGA-IM-A41Y-01A-11R-A23W-07
TCGA-EM-A3AN-01A-11R-A206-07
TCGA-EL-A3ZP-01A-11R-A23N-07
TCGA-BJ-A3F0-01A-11R-A206-07
TCGA-L6-A4EQ-01A-11R-A250-07
TCGA-FE-A3PB-01A-11R-A220-07
TCGA-BJ-A0ZB-01A-11R-A10U-07
TCGA-BJ-A0ZJ-01A-11R-A10U-07
TCGA-EM-A4G1-01A-11R-A250-07
TCGA-DJ-A3V7-01A-11R-A23N-07
TCGA-KS-A4I3-01A-11R-A250-07
TCGA-EL-A3GR-01A-21R-A206-07
TCGA-EM-A3AQ-01A-11R-A20F-07
TCGA-BJ-A45C-01A-11R-A23W-07
TCGA-DJ-A2PN-01A-21R-A19O-07
TCGA-ET-A2MX-01A-11R-A23N-07
TCGA-DJ-A4V2-01A-11R-A250-07
TCGA-ET-A39P-01A-21R-A19O-07
TCGA-DJ-A2Q3-01A-11R-A18C-07
TCGA-DJ-A2QC-01A-11R-A18C-07
TCGA-KS-A4IB-01A-11R-A250-07
TCGA-EM-A3AK-01A-11R-A206-07
TCGA-EM-A3ST-01A-11R-A22U-07
TCGA-FK-A3SD-01A-11R-A22L-07
TCGA-DJ-A2PQ-01A-11R-A18C-07
TCGA-DJ-A13P-01A-11R-A10U-07
TCGA-EM-A2CL-01A-11R-A180-07
TCGA-EL-A3MW-01A-11R-A20F-07
TCGA-J8-A3NZ-01A-11R-A21D-07
TCGA-DE-A4MD-01A-11R-A250-07
TCGA-DJ-A3UY-01A-21R-A22L-07
TCGA-ET-A25O-01A-11R-A16R-07
TCGA-EL-A3ZM-01A-12R-A23N-07
TCGA-EM-A1YE-01A-11R-A14Y-07
TCGA-J8-A42S-01A-11R-A23N-07
TCGA-ET-A2MZ-01A-12R-A19O-07
TCGA-CE-A3ME-01A-11R-A20F-07
TCGA-EM-A3AR-01A-12R-A20F-07
TCGA-FY-A3BL-01A-11R-A19O-07
TCGA-EM-A3FM-01A-11R-A21D-07
TCGA-BJ-A4O8-01A-11R-A250-07
TCGA-H2-A3RI-01A-11R-A220-07
TCGA-ET-A3BQ-01B-11R-A206-07
TCGA-CE-A482-01A-11R-A23W-07
TCGA-DJ-A4UT-01A-11R-A250-07
TCGA-BJ-A3PU-01A-11R-A220-07
TCGA-ET-A25I-01A-11R-A16R-07
TCGA-BJ-A2NA-01A-12R-A19O-07
TCGA-DJ-A3V0-01A-11R-A22U-07
TCGA-DJ-A3VB-01A-11R-A23N-07
TCGA-DJ-A2PV-01A-11R-A19O-07
TCGA-BJ-A3PR-01A-11R-A220-07
TCGA-EL-A3CR-01A-12R-A206-07
TCGA-ET-A25N-01A-11R-A16R-07
TCGA-EM-A1CT-01A-11R-A13Y-07
TCGA-DE-A0Y3-01B-11R-A10U-07
TCGA-DJ-A2Q0-01A-11R-A206-07
TCGA-FE-A239-01A-11R-A16R-07
TCGA-EM-A2CQ-01A-11R-A180-07
TCGA-EL-A3T6-01A-11R-A220-07
TCGA-DE-A4M8-01A-21R-A250-07
TCGA-J8-A3YH-01A-11R-A22U-07
TCGA-FE-A235-01A-11R-A16R-07
TCGA-FE-A233-01A-11R-A14Y-07
TCGA-EM-A4FN-01A-11R-A250-07
TCGA-ET-A39N-01A-11R-A19O-07
TCGA-ET-A4KN-01A-11R-A250-07
TCGA-BJ-A3EZ-01A-11R-A206-07
TCGA-DJ-A3UR-01A-11R-A22L-07
TCGA-FE-A236-01A-11R-A16R-07
TCGA-ET-A2N4-01A-12R-A19O-07
TCGA-ET-A3BO-01A-11R-A19O-07
TCGA-FK-A4UB-01A-11R-A250-07
TCGA-DJ-A13L-01A-11R-A220-07
TCGA-EL-A3ZQ-01A-11R-A23N-07
TCGA-EL-A4K9-01A-11R-A250-07
TCGA-ET-A25P-01A-11R-A16R-07
TCGA-EL-A3ZH-01A-31R-A23N-07
TCGA-EM-A4FU-01A-11R-A250-07
TCGA-KS-A4IC-01A-11R-A250-07
TCGA-CE-A481-01A-21R-A23W-07
TCGA-EL-A3CT-01A-12R-A206-07
TCGA-DJ-A2QA-01A-11R-A18C-07
TCGA-FY-A40L-01A-11R-A23N-07
TCGA-DO-A1K0-01A-11R-A13Y-07
TCGA-EL-A3GW-01A-11R-A206-07
TCGA-EM-A3SU-01A-11R-A22U-07
TCGA-MK-A84Z-01A-11R-A39I-07
TCGA-EL-A3H1-01A-11R-A21D-07
TCGA-EL-A3ZK-01A-21R-A23N-07
TCGA-EL-A3GP-01A-11R-A206-07
TCGA-ET-A40R-01A-11R-A23N-07
TCGA-DJ-A3UX-01A-11R-A22L-07
TCGA-DJ-A1QQ-01A-11R-A14Y-07
TCGA-EL-A3GY-01A-21R-A206-07
TCGA-EL-A4K0-01A-11R-A250-07
TCGA-IM-A3ED-01A-11R-A206-07
TCGA-EL-A3GZ-01A-11R-A20F-07
TCGA-DJ-A1QL-01A-11R-A14Y-07
TCGA-DJ-A4V5-01A-11R-A250-07
TCGA-EL-A3T3-01A-11R-A22L-07
TCGA-E3-A3E1-01A-11R-A20F-07
TCGA-EL-A3ZN-01A-11R-A23N-07
TCGA-EL-A4KI-01A-11R-A250-07
TCGA-DJ-A2Q4-01A-21R-A18C-07
TCGA-IM-A4EB-01A-11R-A250-07
TCGA-ET-A39M-01A-11R-A19O-07
TCGA-EM-A2CU-01A-12R-A180-07
TCGA-E3-A3DZ-01A-11R-A20F-07
TCGA-ET-A3BW-01A-11R-A19O-07
TCGA-DE-A0Y2-01A-11R-A10U-07
TCGA-DJ-A3VF-01A-11R-A23N-07
TCGA-DJ-A3VA-01A-11R-A23N-07
TCGA-E3-A3E2-01A-11R-A20F-07
TCGA-DJ-A1QD-01A-11R-A14Y-07
TCGA-J8-A3O1-01A-11R-A21D-07
TCGA-DJ-A3V3-01A-11R-A22U-07
TCGA-DJ-A2Q2-01A-11R-A19O-07
TCGA-KS-A41F-01A-11R-A23N-07
TCGA-EL-A3N3-01A-11R-A20F-07
TCGA-GE-A2C6-01A-11R-A16R-07
TCGA-EL-A3D6-01A-12R-A206-07
TCGA-DE-A7U5-01A-11R-A39I-07
TCGA-DJ-A3VJ-01A-11R-A23N-07
TCGA-EM-A4FQ-01A-11R-A250-07
TCGA-CE-A3MD-01A-11R-A20F-07
TCGA-ET-A25R-01A-11R-A16R-07
TCGA-EM-A3AP-01A-12R-A20F-07
TCGA-EL-A4JZ-01A-11R-A250-07
TCGA-FE-A23A-01A-11R-A16R-07
TCGA-BJ-A45K-01A-11R-A23W-07
TCGA-DJ-A1QE-01A-21R-A14Y-07
TCGA-E8-A433-01A-11R-A23N-07
TCGA-BJ-A18Z-01A-21R-A13Y-07
TCGA-EL-A4K7-01A-11R-A250-07
TCGA-FY-A3W9-01A-11R-A22L-07
TCGA-EM-A22P-01A-11R-A19O-07
TCGA-DJ-A2PX-01A-11R-A18C-07
TCGA-J8-A3YD-01A-11R-A22U-07
TCGA-EL-A3CV-01A-11R-A19O-07
TCGA-EL-A3CM-01A-11R-A19O-07
TCGA-ET-A40Q-01A-11R-A23N-07
TCGA-FK-A3SE-01A-11R-A22L-07
TCGA-EM-A2OZ-01A-11R-A206-07
TCGA-ET-A3DW-01A-11R-A19O-07
TCGA-H2-A421-01A-11R-A23N-07
TCGA-E8-A417-01A-21R-A23N-07
TCGA-EL-A3T2-01A-11R-A22L-07
TCGA-E3-A3E0-01A-11R-A20F-07
TCGA-DJ-A3UW-01A-11R-A22L-07
TCGA-DJ-A3VG-01A-11R-A23N-07
TCGA-BJ-A28V-01A-11R-A19O-07
TCGA-EM-A2CJ-01A-11R-A180-07
TCGA-EM-A22O-01A-11R-A180-07
TCGA-E3-A3DY-01A-11R-A20F-07
TCGA-BJ-A0ZH-01A-11R-A10U-07
TCGA-BJ-A45J-01A-11R-A23W-07
TCGA-FY-A3I5-01B-11R-A220-07
TCGA-E8-A413-01A-21R-A23N-07
TCGA-FY-A3NM-01A-11R-A21D-07
TCGA-FY-A2QD-01A-11R-A19O-07
TCGA-CE-A485-01A-11R-A23W-07
TCGA-DJ-A13S-01A-11R-A10U-07
TCGA-ET-A3DR-01A-11R-A19O-07
TCGA-DJ-A13O-01A-11R-A10U-07
TCGA-EM-A22N-01A-11R-A180-07
TCGA-E8-A414-01A-11R-A23N-07
TCGA-ET-A3BU-01A-11R-A19O-07
TCGA-EL-A3ZT-01A-12R-A23N-07
TCGA-ET-A39S-01A-11R-A19O-07
TCGA-EM-A3O6-01A-11R-A220-07
TCGA-ET-A3DU-01A-11R-A19O-07
TCGA-DJ-A1QN-01A-11R-A14Y-07
TCGA-ET-A3DP-01A-11R-A21D-07
TCGA-FY-A3NN-01A-11R-A21D-07
TCGA-DJ-A3V9-01A-11R-A23N-07
TCGA-E8-A2JQ-01A-11R-A180-07
TCGA-EM-A4FH-01A-11R-A250-07
TCGA-IM-A420-01A-11R-A23N-07
TCGA-EM-A22K-01A-11R-A180-07
TCGA-EM-A2P0-01A-11R-A206-07
TCGA-BJ-A28R-01A-11R-A16R-07
TCGA-ET-A3BX-01A-11R-A19O-07
TCGA-FY-A4B4-01A-11R-A23W-07
TCGA-ET-A3DQ-01A-11R-A19O-07
TCGA-ET-A3DO-01A-11R-A19O-07
TCGA-E8-A416-01A-11R-A23N-07
TCGA-DJ-A1QG-01A-11R-A14Y-07
TCGA-EM-A2OY-01A-11R-A206-07
TCGA-EL-A3CP-01A-11R-A19O-07
TCGA-BJ-A45F-01A-12R-A23W-07
TCGA-EM-A4FV-01A-11R-A250-07
TCGA-EM-A2P1-01A-11R-A206-07
TCGA-EL-A4JW-01A-11R-A250-07
TCGA-EM-A3AI-01A-11R-A206-07
TCGA-EL-A3GX-01A-11R-A206-07
TCGA-FY-A3NP-01A-11R-A21D-07
TCGA-FY-A4B3-01A-11R-A23W-07
TCGA-ET-A39R-01A-11R-A19O-07
TCGA-EL-A3CY-01A-11R-A19O-07
TCGA-EM-A4FM-01A-11R-A250-07
TCGA-DJ-A4UL-01A-11R-A250-07
TCGA-KS-A4I1-01A-11R-A250-07
TCGA-EM-A2P3-01A-11R-A206-07
TCGA-BJ-A2P4-01A-11R-A18C-07
TCGA-KS-A4I5-01A-11R-A250-07
TCGA-EL-A3ZS-01A-12R-A23N-07
TCGA-EM-A3SX-01A-11R-A22U-07
TCGA-EM-A1YB-01A-11R-A14Y-07
TCGA-ET-A39I-01A-11R-A19O-07
TCGA-E8-A419-01A-11R-A23N-07
TCGA-BJ-A45G-01A-11R-A23W-07
TCGA-EL-A3CZ-01A-11R-A19O-07
TCGA-ET-A39O-01A-11R-A19O-07
TCGA-BJ-A192-01A-31R-A13Y-07
TCGA-EL-A3CN-01A-12R-A20F-07
TCGA-EM-A4FK-01A-11R-A250-07
TCGA-BJ-A0Z0-01A-11R-A10U-07
TCGA-FY-A76V-01A-11R-A39I-07
TCGA-DJ-A2PY-01A-11R-A18C-07
TCGA-IM-A41Z-01A-11R-A23N-07
TCGA-FE-A232-01A-11R-A14Y-07
TCGA-BJ-A0Z5-01A-11R-A10U-07
TCGA-EM-A2CS-01A-11R-A180-07
TCGA-EM-A1CW-01A-21R-A13Y-07
TCGA-KS-A4I9-01A-11R-A250-07
TCGA-DJ-A13T-01A-11R-A10U-07
TCGA-ET-A4KQ-01A-12R-A250-07
TCGA-EL-A3T8-01A-21R-A22L-07
TCGA-FY-A3RA-01A-11R-A220-07
TCGA-BJ-A28X-01A-11R-A22L-07
TCGA-EM-A22M-01A-11R-A32Y-07
TCGA-ET-A40T-01A-11R-A23N-07
TCGA-FK-A3SH-01A-11R-A22L-07
TCGA-E8-A438-01A-11R-A23W-07
TCGA-E8-A44M-01A-21R-A23W-07
TCGA-EM-A2CR-01A-11R-A180-07
TCGA-BJ-A0ZG-01A-11R-A10U-07
TCGA-EL-A3MY-01A-11R-A21D-07
TCGA-DJ-A1QO-01A-11R-A14Y-07
TCGA-ET-A25G-01A-11R-A16R-07
TCGA-EM-A3OB-01A-11R-A220-07
TCGA-DO-A1JZ-01A-11R-A13Y-07
TCGA-ET-A39K-01A-11R-A19O-07
TCGA-ET-A3DS-01A-11R-A19O-07
TCGA-EL-A4KH-01A-11R-A250-07
TCGA-DE-A4MB-01A-11R-A250-07
TCGA-EM-A3O7-01A-11R-A220-07
TCGA-EL-A3CU-01A-11R-A19O-07
TCGA-EM-A3SZ-01A-11R-A22U-07
TCGA-FY-A3WA-01A-11R-A22L-07
TCGA-BJ-A0Z3-01A-11R-A13Y-07
TCGA-FY-A3TY-01A-11R-A22U-07
TCGA-EL-A3TB-01A-11R-A22L-07
TCGA-DJ-A2PS-01A-11R-A18C-07
TCGA-E8-A2EA-01A-11R-A180-07
TCGA-DJ-A2Q1-01A-22R-A19O-07
TCGA-DJ-A3VK-01A-11R-A23N-07
TCGA-EM-A2CN-01A-11R-A19O-07
TCGA-BJ-A0ZF-01A-11R-A10U-07
TCGA-EM-A3FK-01A-11R-A21D-07
TCGA-BJ-A0ZE-01A-11R-A10U-07
TCGA-DJ-A3V4-01A-11R-A22U-07
TCGA-ET-A3BP-01A-21R-A19O-07
TCGA-DJ-A2PU-01A-12R-A19O-07
TCGA-J8-A3O0-01A-11R-A21D-07
TCGA-EM-A3FP-01A-11R-A21D-07
TCGA-EM-A3FN-01A-11R-A21D-07
TCGA-DJ-A2PW-01A-11R-A19O-07
TCGA-BJ-A0ZA-01A-11R-A10U-07
TCGA-EM-A2OV-01A-11R-A206-07
TCGA-FY-A3R7-01A-11R-A220-07
TCGA-FK-A3S3-01A-11R-A22L-07
TCGA-EM-A1CS-01A-11R-A13Y-07
TCGA-EL-A3T9-01A-21R-A22L-07
TCGA-BJ-A2N7-01A-11R-A18C-07
TCGA-ET-A40S-01A-11R-A23N-07
TCGA-EL-A3ZO-01A-11R-A23N-07
TCGA-FE-A231-01A-11R-A14Y-07
TCGA-EL-A3GQ-01A-11R-A206-07
TCGA-E8-A437-01A-12R-A23W-07
TCGA-DE-A69K-01A-11R-A39I-07
TCGA-DJ-A2PP-01A-11R-A19O-07
TCGA-FY-A4B0-01A-21R-A23W-07
TCGA-DJ-A3UK-01A-11R-A22L-07
TCGA-BJ-A3PT-01A-12R-A220-07
TCGA-EM-A2CT-01A-11R-A180-07
TCGA-EL-A3D5-01A-22R-A206-07
TCGA-EL-A3GV-01A-11R-A21D-07
TCGA-BJ-A45I-01A-11R-A23W-07
TCGA-EM-A3AJ-01A-11R-A206-07
TCGA-BJ-A2N9-01A-11R-A18C-07
TCGA-KS-A4I7-01A-11R-A250-07
TCGA-KS-A4ID-01A-11R-A250-07
TCGA-FE-A230-01A-11R-A14Y-07
TCGA-DJ-A2Q5-01A-11R-A18C-07
TCGA-EL-A4K2-01A-11R-A250-07
TCGA-EL-A4K4-01A-11R-A250-07
TCGA-EM-A22L-01A-11R-A180-07
TCGA-DE-A0XZ-01A-11R-A180-07
TCGA-EL-A3T7-01A-11R-A22L-07
TCGA-EM-A3FR-01A-11R-A220-07
TCGA-ET-A2N0-01A-11R-A18C-07
TCGA-E8-A44K-01A-21R-A23W-07
TCGA-DJ-A4UW-01A-11R-A250-07
TCGA-EL-A3CO-01A-11R-A19O-07
TCGA-DE-A4MA-01A-11R-A250-07
TCGA-E8-A432-01A-11R-A23N-07
TCGA-BJ-A18Y-01A-11R-A13Y-07
TCGA-DJ-A13X-01A-11R-A10U-07
TCGA-BJ-A190-01A-11R-A13Y-07
TCGA-FE-A238-01A-11R-A16R-07
TCGA-FK-A3SB-01A-11R-A22L-07
TCGA-4C-A93U-01A-11R-A39I-07
TCGA-EM-A3SY-01A-11R-A22U-07
TCGA-EL-A4KG-01A-11R-A250-07
TCGA-DJ-A2PR-01A-11R-A19O-07
TCGA-DJ-A3UP-01A-11R-A22L-07
TCGA-FE-A22Z-01A-11R-A16R-07
TCGA-E8-A242-01A-21R-A16R-07
TCGA-EM-A3AL-01A-11R-A206-07
TCGA-ET-A3BN-01A-11R-A19O-07
TCGA-E3-A3E5-01A-11R-A20F-07
TCGA-ET-A2N3-01B-21R-A23N-07
TCGA-BJ-A2N8-01A-11R-A18C-07
TCGA-DJ-A3US-01A-11R-A22L-07
TCGA-L6-A4EP-01A-11R-A250-07
TCGA-KS-A41L-01A-11R-A23N-07
TCGA-DJ-A1QH-01A-21R-A14Y-07
TCGA-DJ-A4V0-01A-11R-A250-07
TCGA-EL-A3T0-01A-22R-A22L-07
TCGA-EL-A3H2-01A-11R-A20F-07
TCGA-DJ-A4V4-01A-11R-A250-07
TCGA-EM-A4FO-01A-11R-A250-07
TCGA-DO-A2HM-01B-11R-A22L-07
TCGA-DJ-A3V5-01A-11R-A22U-07
TCGA-ET-A40P-01A-11R-A23N-07
TCGA-EL-A3GS-01A-11R-A20F-07
TCGA-EL-A3H7-01A-11R-A21D-07
TCGA-DJ-A3UT-01A-11R-A22L-07
TCGA-FE-A3PD-01A-11R-A220-07
TCGA-E8-A436-01A-12R-A23W-07
TCGA-DE-A3KN-01A-11R-A20F-07
TCGA-MK-A4N7-01A-11R-A250-07
TCGA-EL-A3H4-01A-11R-A206-07
TCGA-DJ-A3VL-01A-11R-A23N-07
TCGA-DJ-A2Q9-01A-21R-A18C-07
TCGA-J8-A3YF-01A-12R-A23N-07
TCGA-BJ-A45D-01A-11R-A23W-07
TCGA-EM-A4FF-01A-11R-A250-07
TCGA-EL-A4JX-01A-12R-A250-07
TCGA-DJ-A3UZ-01A-11R-A22U-07
TCGA-EL-A4KD-01A-11R-A250-07
TCGA-DE-A2OL-01A-11R-A18C-07
TCGA-EL-A3CX-01A-11R-A19O-07
TCGA-EL-A4K1-01A-11R-A250-07
TCGA-DJ-A4UR-01A-11R-A250-07
TCGA-DJ-A2QB-01A-11R-A19O-07
TCGA-EL-A4JV-01A-11R-A250-07
TCGA-ET-A3DV-01A-12R-A206-07
TCGA-E8-A434-01A-11R-A23N-07
TCGA-EM-A2P2-01A-11R-A206-07
TCGA-EM-A1CV-01A-11R-A13Y-07
TCGA-J8-A3O2-01A-11R-A23N-07
TCGA-ET-A2N5-01A-11R-A18C-07
TCGA-ET-A25M-01A-11R-A16R-07
